# Supplementary material
Source: publisher site journal article supplement (https://www.dovepress.com/get_supplementary_file.php?f=271417.xlsx)
Supplement: Supplementary file 1 [file get_supplementary_file.php]

## Sheet: Supplementary Table 1
Supplementary Table 1 GO analysis of differentially expressed genes in PCPG comparing with normal adrenal gland tissue.
ONTOLOGY	ID	Description	GeneRatio	BgRatio	pvalue	geneID	Count
BP	GO:0099504	synaptic vesicle cycle	78/3084	159/11512	1.38812e-09	NLGN3/PLD1/SYT12/SLC2A4/STX11/STX4/RIMS2/SNAP23/SH3GL1/ITSN1/CDH2/RAPGEF4/DNM1L/PREPL/GIT1/VAMP2/PFN2/CACNB2/DNAJC6/VAMP4/MAGI2/RAB3A/SYNJ1/KIAA1107/PPFIA3/ERC2/STXBP5L/APBA2/PRKAR1B/SNCA/DGKI/STXBP1/SNPH/BSN/PCDH17/DOC2B/CDK5R1/SYNDIG1/PCLO/NLGN4X/SV2A/ADCY1/BRSK2/CSPG5/TRIM9/SYT17/AMPH/NLGN1/DNM1/SYN2/SYP/PPFIA2/NRXN1/SNAP25/SYN1/SNCB/STX1A/APBA1/TH/FGF14/SYT11/CADPS/UNC13A/SLC18A1/RIMS3/SYT1/S…	78
BP	GO:0097479	synaptic vesicle localization	66/3084	128/11512	1.9082e-09	NLGN3/SYT12/SLC2A4/STX11/PINK1/STX4/RIMS2/SNAP23/CDH2/DNM1L/PREPL/GIT1/VAMP2/PFN2/AP3M2/CACNB2/MAGI2/KIF5C/RAB3A/SYNJ1/PPFIA3/ERC2/STXBP5L/APBA2/SNCA/DGKI/STXBP1/SNPH/PCDH17/DOC2B/SYNDIG1/LIN7A/PCLO/SV2A/ADCY1/BRSK2/CSPG5/TRIM9/SYT17/NLGN1/AP3B2/DNM1/SYN2/SYP/PPFIA2/SNAP25/SYN1/STX1A/APBA1/MAP2/SYT11/CADPS/UNC13A/RIMS3/SYT1/TRIM46/SNAP91/CHRNA5/RIMS1/GRIK5/KIF5A/CHRNB2/SYT5/DRD2/CPLX2/SYT2	66
BP	GO:0007269	neurotransmitter secretion	69/3084	140/11512	9.58648e-09	SLC6A9/SNCG/SYT12/KCNMB4/STX11/STX4/SLC30A1/RIMS2/MEF2C/SNAP23/DNM1L/PREPL/GIT1/VAMP2/PFN2/CACNB2/RAB3A/NAAA/SYNJ1/KCNC4/PPFIA3/ERC2/STXBP5L/APBA2/LIN7B/SNCA/DGKI/STXBP1/SNPH/DOC2B/NRXN2/LIN7A/PCLO/SV2A/ADCY1/CSPG5/TRIM9/SYT17/NLGN1/BAIAP3/SYN2/SYP/PPFIA2/NRXN1/ASIC1/SNAP25/SYN1/STX1A/APBA1/PTPRN2/PPFIA4/SYT11/CADPS/UNC13A/RIMS3/SYT1/CHRNB4/CHRNA5/RIMS1/GRIK5/CACNA1B/CHRNA3/CHRNB2/SYT5/RPH3A/SLC1…	69
BP	GO:0099643	signal release from synapse	69/3084	140/11512	9.58648e-09	SLC6A9/SNCG/SYT12/KCNMB4/STX11/STX4/SLC30A1/RIMS2/MEF2C/SNAP23/DNM1L/PREPL/GIT1/VAMP2/PFN2/CACNB2/RAB3A/NAAA/SYNJ1/KCNC4/PPFIA3/ERC2/STXBP5L/APBA2/LIN7B/SNCA/DGKI/STXBP1/SNPH/DOC2B/NRXN2/LIN7A/PCLO/SV2A/ADCY1/CSPG5/TRIM9/SYT17/NLGN1/BAIAP3/SYN2/SYP/PPFIA2/NRXN1/ASIC1/SNAP25/SYN1/STX1A/APBA1/PTPRN2/PPFIA4/SYT11/CADPS/UNC13A/RIMS3/SYT1/CHRNB4/CHRNA5/RIMS1/GRIK5/CACNA1B/CHRNA3/CHRNB2/SYT5/RPH3A/SLC1…	69
BP	GO:0099003	vesicle-mediated transport in synapse	77/3084	167/11512	5.49134e-08	NLGN3/SYT12/SLC2A4/STX11/PINK1/STX4/RIMS2/SNAP23/SH3GL1/ITSN1/EPS15/DNM1L/PREPL/GIT1/VAMP2/PFN2/AP3M2/CACNB2/DNAJC6/VAMP4/CLSTN1/KIF5C/RAB3A/SYNJ1/KIAA1107/GRIP2/PPFIA3/ERC2/STXBP5L/APBA2/SNCA/DGKI/STXBP1/SNPH/DOC2B/LIN7A/PCLO/ITGB3/NLGN4X/SV2A/ADCY1/CSPG5/TRIM9/SYT17/AMPH/GRIP1/NLGN1/AP3B2/CALY/DNM1/SYP/HPCA/PPFIA2/SNAP25/SYN1/SNCB/STX1A/APBA1/ARC/MAP2/SYT11/CADPS/UNC13A/RIMS3/SYT1/TRIM46/SNAP91…	77
BP	GO:0048489	synaptic vesicle transport	59/3084	119/11512	8.52477e-08	SYT12/SLC2A4/STX11/PINK1/STX4/RIMS2/SNAP23/DNM1L/PREPL/GIT1/VAMP2/PFN2/AP3M2/CACNB2/KIF5C/RAB3A/SYNJ1/PPFIA3/ERC2/STXBP5L/APBA2/SNCA/DGKI/STXBP1/SNPH/DOC2B/LIN7A/PCLO/SV2A/ADCY1/CSPG5/TRIM9/SYT17/NLGN1/AP3B2/DNM1/SYP/PPFIA2/SNAP25/SYN1/STX1A/APBA1/MAP2/SYT11/CADPS/UNC13A/RIMS3/SYT1/TRIM46/SNAP91/CHRNA5/RIMS1/GRIK5/KIF5A/CHRNB2/SYT5/DRD2/CPLX2/SYT2	59
BP	GO:0097480	establishment of synaptic vesicle localization	59/3084	119/11512	8.52477e-08	SYT12/SLC2A4/STX11/PINK1/STX4/RIMS2/SNAP23/DNM1L/PREPL/GIT1/VAMP2/PFN2/AP3M2/CACNB2/KIF5C/RAB3A/SYNJ1/PPFIA3/ERC2/STXBP5L/APBA2/SNCA/DGKI/STXBP1/SNPH/DOC2B/LIN7A/PCLO/SV2A/ADCY1/CSPG5/TRIM9/SYT17/NLGN1/AP3B2/DNM1/SYP/PPFIA2/SNAP25/SYN1/STX1A/APBA1/MAP2/SYT11/CADPS/UNC13A/RIMS3/SYT1/TRIM46/SNAP91/CHRNA5/RIMS1/GRIK5/KIF5A/CHRNB2/SYT5/DRD2/CPLX2/SYT2	59
BP	GO:0050808	synapse organization	130/3084	326/11512	1.30202e-07	APOE/C3/NLGN3/GPC4/SNCG/CAMK1/PDZRN3/CHRNB1/WASF3/REST/SRPX2/FARP1/LRP4/LAMB2/KALRN/ITGAM/RER1/RYK/DNAJA3/MEF2C/DLG5/CTTN/RAB29/EIF4G1/ITSN1/ETV5/CDH2/SYNPO/WASF2/DNM1L/ABI2/DCTN1/ACTN1/PFN2/BHLHB9/DLG3/SLC9A6/CACNB2/MAGI2/CLSTN1/PRNP/PTPRF/LZTS3/MYO5A/NFASC/ARHGAP33/DLG4/RAB3A/COL4A1/GLRB/TUBA1A/WASF1/ERC2/LRP8/BAIAP2/SNCA/FYN/AGRN/CACNB1/NECTIN1/BSN/PCDH17/PCDHB6/ADGRL1/ARHGAP44/CDK5R1/NRXN2/SY…	130
BP	GO:0006836	neurotransmitter transport	97/3084	230/11512	2.52686e-07	SLC6A9/SLC44A4/SNCG/SLC6A6/SYT12/KCNMB4/STX11/MAOB/RGS2/SLC1A3/SEC14L1/STX4/SLC30A1/RIMS2/SLC6A8/MEF2C/SNAP23/DNM1L/PREPL/SLC25A12/GIT1/VAMP2/SLC25A22/PFN2/CACNB2/PRAF2/RAB3A/NAAA/SYNJ1/LYN/SLC36A1/PER2/KCNC4/PPFIA3/ERC2/STXBP5L/APBA2/LIN7B/SLC29A2/SNCA/DGKI/ABAT/STXBP1/SNPH/DOC2B/NRXN2/LIN7A/PCLO/ITGB3/SLC1A1/SV2A/ADCY1/SLC38A1/CSPG5/TRIM9/SYT17/NLGN1/BAIAP3/SYN2/SYP/PPFIA2/ICA1/NRXN1/ASIC1/SNAP…	97
BP	GO:0016079	synaptic vesicle exocytosis	48/3084	95/11512	6.58973e-07	SYT12/STX11/STX4/RIMS2/SNAP23/DNM1L/PREPL/GIT1/VAMP2/PFN2/CACNB2/RAB3A/SYNJ1/PPFIA3/ERC2/STXBP5L/APBA2/SNCA/DGKI/STXBP1/SNPH/DOC2B/PCLO/SV2A/ADCY1/CSPG5/TRIM9/SYT17/NLGN1/SYP/PPFIA2/SNAP25/SYN1/STX1A/APBA1/SYT11/CADPS/UNC13A/RIMS3/SYT1/CHRNA5/RIMS1/GRIK5/CHRNB2/SYT5/DRD2/CPLX2/SYT2	48
BP	GO:0048667	cell morphogenesis involved in neuron differentiation	178/3084	486/11512	7.67216e-07	SEMA3B/APOE/SLIT2/NLGN3/RAP1GAP/SLC9A3R1/B4GALT5/FGFR2/EZR/CXCR4/UST/EPHB4/LAMA2/ROBO3/FARP1/ZEB2/MYO7A/SEMA6A/LRP4/SLC1A3/ID2/SMO/SPART/ENAH/LAMB2/PIK3CA/WHRN/KALRN/SRC/DOK2/PRKCA/GLI3/EPHA2/RYK/MEF2C/EXT1/CTTN/SPTBN1/CDH2/PARD3/DNM1L/ABI2/RAPGEF2/KIDINS220/FZD3/PSPN/MAP1S/TRIO/RBFOX2/NCAM1/PIK3R1/EVL/APBB1/BHLHB9/SLC9A6/PDLIM7/PAK1/ADARB1/B3GNT2/PTPRA/LIMK1/LZTS3/METRN/GDI1/NFASC/ARHGAP33/KIF5C…	178
BP	GO:0099177	regulation of trans-synaptic signaling	141/3084	370/11512	8.99085e-07	STAR/APOE/SLC6A9/NLGN3/SNCG/AKAP7/SYT12/PRKAR2B/EGFR/ITPR3/LAMA2/PACSIN2/KCNMB4/CCL2/SLC1A3/SRC/PINK1/EIF4A3/STX4/SLC30A1/RIMS2/EIF4EBP2/GNAI1/MEF2C/SH3GL1/CDH2/SYNPO/PLCL2/KCTD13/DNM1L/NCDN/RAPGEF2/IQSEC2/PREPL/CPEB3/GIT1/VAMP2/PFN2/CACNB2/RARA/CLSTN1/PTPRA/PRNP/CRTC1/RIN1/SYNGR1/DLG4/RAB3A/YWHAH/CYP46A1/KCNC4/PPFIA3/LRP8/STXBP5L/MAPK8IP2/APBA2/PRKAR1B/BAIAP2/SNCA/FYN/DGKI/DGKE/ABAT/STXBP1/FABP5…	141
BP	GO:0050804	modulation of chemical synaptic transmission	140/3084	369/11512	1.30922e-06	STAR/APOE/SLC6A9/NLGN3/SNCG/AKAP7/SYT12/PRKAR2B/EGFR/ITPR3/LAMA2/PACSIN2/KCNMB4/CCL2/SLC1A3/SRC/PINK1/EIF4A3/STX4/SLC30A1/RIMS2/EIF4EBP2/GNAI1/MEF2C/SH3GL1/CDH2/SYNPO/PLCL2/KCTD13/DNM1L/NCDN/RAPGEF2/IQSEC2/PREPL/CPEB3/GIT1/VAMP2/PFN2/CACNB2/RARA/CLSTN1/PTPRA/PRNP/CRTC1/RIN1/SYNGR1/DLG4/RAB3A/YWHAH/CYP46A1/KCNC4/PPFIA3/LRP8/STXBP5L/MAPK8IP2/APBA2/PRKAR1B/BAIAP2/SNCA/FYN/DGKI/DGKE/ABAT/STXBP1/PCDH1…	140
BP	GO:0017156	calcium ion regulated exocytosis	56/3084	121/11512	3.00123e-06	SYT12/REST/STX11/CACNA1H/STX4/RIMS2/SNAP23/RAPGEF4/DNM1L/PREPL/GIT1/VAMP2/PFN2/CACNB2/RAB3A/SYNJ1/PPFIA3/ERC2/STXBP5L/APBA2/SNCA/DGKI/STXBP1/SNPH/DOC2B/SCAMP5/PCLO/SV2A/ADCY1/CSPG5/TRIM9/SYT17/NLGN1/BAIAP3/SYN2/SYP/PPFIA2/SNAP25/SYN1/STX1A/APBA1/SYT11/CADPS/UNC13A/RIMS3/SYT1/KCNB1/CHRNA5/RIMS1/GRIK5/CHRNB2/SYT5/CDK5R2/DRD2/CPLX2/SYT2	56
BP	GO:0098693	regulation of synaptic vesicle cycle	45/3084	92/11512	4.52087e-06	NLGN3/PLD1/SLC2A4/RIMS2/SH3GL1/CDH2/RAPGEF4/DNM1L/PREPL/GIT1/PFN2/CACNB2/VAMP4/MAGI2/RAB3A/STXBP5L/APBA2/PRKAR1B/SNCA/DGKI/STXBP1/BSN/PCDH17/CDK5R1/ADCY1/BRSK2/CSPG5/NLGN1/DNM1/SYP/PPFIA2/NRXN1/SYN1/STX1A/APBA1/FGF14/SYT11/RIMS3/SYT1/CHRNA5/RIMS1/GRIK5/CHRNB2/DRD2/CPLX2	45
BP	GO:0061564	axon development	153/3084	426/11512	1.57238e-05	SEMA3B/APOE/SLIT2/NLGN3/RAP1GAP/B4GALT5/FGFR2/EZR/CXCR4/UST/EPHB4/LAMA2/ROBO3/APOD/ZEB2/SEMA6A/KLF4/LRP4/SMO/CTNNA1/SPART/ENAH/LAMB2/PIK3CA/TSPO/CERS2/SRC/DOK2/PRKCA/GLI3/EPHA2/RYK/EXT1/CTTN/SPTBN1/CDH2/PARD3/FZD3/PSPN/MAP1S/GRN/TRIO/NCAM1/PIK3R1/EVL/APBB1/SLC9A6/PDLIM7/PAK1/ADARB1/B3GNT2/PTPRA/PTPRF/LIMK1/METRN/GDI1/NFASC/KIF5C/SPTBN5/MAPK8IP3/PTPRM/KIF3A/RAB3A/SEMA5A/RUFY3/SHC1/RPS6KA5/AUTS2/DO…	153
BP	GO:0001505	regulation of neurotransmitter levels	112/3084	296/11512	1.69847e-05	RGN/SLC6A9/SLC44A4/SNCG/SYT12/ASS1/RIDA/POR/ZNF219/KCNMB4/RORA/ZC3H12A/STX11/MAOB/KLF4/RGS2/GCAT/SLC1A3/DDAH1/MAOA/NQO1/TSPO/ALDH7A1/CHKA/ALDH9A1/COMT/STX4/SLC30A1/RIMS2/SHMT1/MEF2C/SNAP23/SIRPA/DNM1L/PREPL/GIT1/VAMP2/PFN2/ATP7A/CACNB2/RAB3A/NAAA/SYNJ1/PER2/KCNC4/PPFIA3/ERC2/STXBP5L/APBA2/LIN7B/SLC29A2/SNCA/DGKI/ABAT/STXBP1/SNPH/DOC2B/SRD5A1/NRXN2/NOS1AP/LIN7A/PCLO/ITGB3/SLC1A1/SV2A/ADCY1/SLC38A1…	112
BP	GO:0023061	signal release	142/3084	394/11512	2.58639e-05	TBX3/GJA1/IRS1/SLC6A9/SLC44A4/SLC8B1/INHA/AGTR1/SNCG/SYT12/EGFR/ARNTL/WLS/NADK/ITPR3/REST/KCNMB4/SREBF1/HFE/STX11/HIF1A/C1QTNF1/NKX3-1/LRP5/HMGCR/CPT1A/SERP1/KALRN/RAB11FIP1/PRKCA/STX4/SLC30A1/RIMS2/MEF2C/GLUD1/SNAP23/ITSN1/TCIRG1/RAPGEF4/DNM1L/C2CD2L/PREPL/GIT1/VAMP2/PFN2/MAP4K4/CACNB2/RAB11FIP5/SOX4/MYO5A/RFX3/CAMK2G/RAB3A/NAAA/C1QTNF3/SYNJ1/LYN/PER2/ADM/KCNC4/PPFIA3/ERC2/STXBP5L/APBA2/MYRIP/LI…	142
BP	GO:0007409	axonogenesis	140/3084	390/11512	3.68006e-05	SEMA3B/APOE/SLIT2/NLGN3/RAP1GAP/B4GALT5/FGFR2/EZR/CXCR4/UST/EPHB4/LAMA2/ROBO3/ZEB2/SEMA6A/LRP4/SMO/SPART/ENAH/LAMB2/PIK3CA/SRC/DOK2/PRKCA/GLI3/EPHA2/RYK/EXT1/CTTN/SPTBN1/CDH2/PARD3/FZD3/PSPN/MAP1S/TRIO/NCAM1/PIK3R1/EVL/APBB1/SLC9A6/PDLIM7/PAK1/ADARB1/B3GNT2/PTPRA/LIMK1/METRN/GDI1/NFASC/KIF5C/SPTBN5/PTPRM/KIF3A/RAB3A/SEMA5A/RUFY3/SHC1/RPS6KA5/AUTS2/DOK4/SEMA3G/SLIT3/GAB2/PLXNA3/BAIAP2/FN1/SEMA4F/R…	140
BP	GO:0097091	synaptic vesicle clustering	11/3084	14/11512	7.90544e-05	NLGN3/CDH2/MAGI2/RAB3A/PCDH17/SYNDIG1/PCLO/BRSK2/NLGN1/SYN2/SYN1	11
BP	GO:0097485	neuron projection guidance	87/3084	227/11512	8.46201e-05	SEMA3B/SLIT2/RAP1GAP/EZR/CXCR4/EPHB4/LAMA2/ROBO3/SEMA6A/SMO/ENAH/LAMB2/PIK3CA/SRC/DOK2/PRKCA/GLI3/EPHA2/RYK/EXT1/SPTBN1/FZD3/PSPN/TRIO/NCAM1/PIK3R1/EVL/PDLIM7/B3GNT2/PTPRA/NFASC/KIF5C/SPTBN5/PTPRM/KIF3A/SEMA5A/SHC1/RPS6KA5/DOK4/SEMA3G/SLIT3/GAB2/PLXNA3/SEMA4F/FYN/TUBB3/AGRN/FEZ1/NECTIN1/DPYSL4/CDK5R1/PLXNC1/ALCAM/SEMA6C/ANOS1/BMPR1B/EPHA3/FLRT3/SEMA6D/PLXNA2/DAB1/EFNA5/GFRA2/PLXNB1/EPHB6/GATA3/PT…	87
BP	GO:0046928	regulation of neurotransmitter secretion	40/3084	87/11512	8.98396e-05	SNCG/SYT12/KCNMB4/SLC30A1/RIMS2/MEF2C/DNM1L/PREPL/GIT1/PFN2/CACNB2/RAB3A/KCNC4/STXBP5L/APBA2/SNCA/DGKI/STXBP1/ADCY1/CSPG5/NLGN1/BAIAP3/SYP/PPFIA2/ASIC1/SYN1/STX1A/APBA1/SYT11/UNC13A/RIMS3/SYT1/CHRNB4/CHRNA5/RIMS1/GRIK5/CHRNA3/CHRNB2/DRD2/CPLX2	40
BP	GO:0050806	positive regulation of synaptic transmission	61/3084	149/11512	0.000114225	APOE/NLGN3/SYT12/EGFR/ITPR3/LAMA2/CCL2/SLC1A3/PINK1/STX4/RIMS2/KCTD13/DNM1L/VAMP2/CACNB2/CLSTN1/PRNP/CRTC1/DLG4/CYP46A1/BAIAP2/SNCA/ABAT/STXBP1/PRKCE/SERPINE2/CLSTN3/ADCY1/CLSTN2/S100B/CACNB3/NLGN1/BAIAP3/OXTR/NRGN/IGSF9B/NRXN1/SNAP25/PTN/GRIK2/STX1A/GRIN2A/SLC24A2/RGS4/ARC/UNC13A/MPP2/RIMS3/SYT1/TNR/SLC8A2/RIMS1/CHRNB2/CACNG4/INS/ADORA1/LRRTM2/NTRK1/DRD2/CACNG2/ADCYAP1	61
BP	GO:0017158	regulation of calcium ion-dependent exocytosis	40/3084	88/11512	0.000122547	SYT12/REST/CACNA1H/RIMS2/DNM1L/PREPL/GIT1/PFN2/CACNB2/RAB3A/STXBP5L/APBA2/DGKI/STXBP1/DOC2B/SCAMP5/ADCY1/CSPG5/TRIM9/SYT17/NLGN1/BAIAP3/SYP/PPFIA2/SYN1/STX1A/APBA1/SYT11/RIMS3/SYT1/KCNB1/CHRNA5/RIMS1/GRIK5/CHRNB2/SYT5/CDK5R2/DRD2/CPLX2/SYT2	40
BP	GO:0007411	axon guidance	86/3084	226/11512	0.000123861	SEMA3B/SLIT2/RAP1GAP/EZR/CXCR4/EPHB4/LAMA2/ROBO3/SEMA6A/SMO/ENAH/LAMB2/PIK3CA/SRC/DOK2/PRKCA/GLI3/EPHA2/RYK/EXT1/SPTBN1/FZD3/PSPN/TRIO/NCAM1/PIK3R1/EVL/PDLIM7/B3GNT2/PTPRA/NFASC/KIF5C/SPTBN5/PTPRM/KIF3A/SEMA5A/SHC1/RPS6KA5/DOK4/SEMA3G/SLIT3/GAB2/PLXNA3/SEMA4F/FYN/TUBB3/AGRN/FEZ1/NECTIN1/CDK5R1/PLXNC1/ALCAM/SEMA6C/ANOS1/BMPR1B/EPHA3/FLRT3/SEMA6D/PLXNA2/DAB1/EFNA5/GFRA2/PLXNB1/EPHB6/GATA3/PTPRO/SPT…	86
BP	GO:0048167	regulation of synaptic plasticity	63/3084	158/11512	0.000217368	STAR/APOE/NLGN3/SYT12/ITPR3/STX4/RIMS2/EIF4EBP2/MEF2C/SYNPO/NCDN/RAPGEF2/CPEB3/VAMP2/RARA/PRNP/CRTC1/RIN1/SYNGR1/DLG4/RAB3A/YWHAH/CYP46A1/PPFIA3/BAIAP2/SNCA/DGKI/STXBP1/MAP1B/SERPINE2/HRH1/NSMF/ADCY1/LZTS1/DBN1/S100B/NLGN1/NRGN/SYP/SNAP25/PTN/GRIK2/MAP1A/GRIN2A/SLC24A2/ARC/FGF14/UNC13A/MPP2/RIMS3/KCNB1/NEURL1/TNR/SLC8A2/RIMS1/MAPT/CAMK2B/INS/ADORA1/LRRTM2/DRD2/CPLX2/CBLN1	63
BP	GO:0048791	calcium ion-regulated exocytosis of neurotransmitter	9/3084	11/11512	0.000223719	RIMS2/DOC2B/SYT17/SYT11/RIMS3/SYT1/RIMS1/SYT5/SYT2	9
BP	GO:0010975	regulation of neuron projection development	143/3084	414/11512	0.000242515	SEMA3B/APOE/SLIT2/NLGN3/CAMK1/CXCR4/UST/NR2F1/ZEB2/SEMA6A/KLF4/LRP4/RGS2/PRKD1/SPART/KALRN/CERS2/RIMS2/CIB1/RYK/SMURF1/LLPH/MEF2C/DLG5/CTTN/RAB29/CFLAR/ITSN1/CDH2/ATF1/MYO9A/DNM1L/ABI2/RAPGEF2/KIDINS220/CPEB3/GRN/MAP4K4/APBB1/BHLHB9/PAQR3/PAK1/TENM3/MAGI2/PTPRF/LIMK1/LZTS3/METRN/CBFA2T2/CAMK1D/GDI1/CRTC1/ARHGAP33/DLG4/PPP2R5B/SEMA5A/RUFY3/LYN/MARK1/YWHAH/SEMA3G/LRP8/PLXNA3/BAIAP2/FN1/SEMA4F/RND2/…	143
BP	GO:0042391	regulation of membrane potential	122/3084	348/11512	0.000348161	KCNQ1/DCN/GJA1/KCNN2/NLGN3/SLC8B1/KCNK3/CHRNB1/ATP1B3/FGF12/KCNJ5/BAK1/KCNMB4/PRDX3/GPD1L/USP53/GLRX/CACNA1H/ABCD1/SPART/TSPO/RNF122/CTNS/SRC/PINK1/EIF4A3/GCLM/RIMS2/DLD/MEF2C/SH3GL1/WWP2/AKT2/NDUFS1/FHL1/SNTA1/GABBR1/ATP1A1/CACNB2/SNX16/CRTC1/DLG4/CACNA2D1/YWHAH/CNTNAP1/GLRB/ANK2/MAPK8IP2/BAIAP2/SNCA/DGKI/ABAT/KCNK15/ATP1B1/PYCR1/BCL2/SCN8A/FKBP1B/NOS1AP/GJC1/KCNK7/KCNMA1/SLC8A1/NLGN4X/PIEZO2/PK…	122
BP	GO:0048488	synaptic vesicle endocytosis	24/3084	48/11512	0.000497775	NLGN3/SLC2A4/SH3GL1/ITSN1/DNM1L/DNAJC6/VAMP4/SYNJ1/KIAA1107/SNCA/NLGN4X/SYT17/AMPH/NLGN1/DNM1/SYP/SNCB/STX1A/SYT11/SYT1/SNAP91/SYT5/RAB27B/SYT2	24
BP	GO:0140238	presynaptic endocytosis	24/3084	48/11512	0.000497775	NLGN3/SLC2A4/SH3GL1/ITSN1/DNM1L/DNAJC6/VAMP4/SYNJ1/KIAA1107/SNCA/NLGN4X/SYT17/AMPH/NLGN1/DNM1/SYP/SNCB/STX1A/SYT11/SYT1/SNAP91/SYT5/RAB27B/SYT2	24
BP	GO:0010866	regulation of triglyceride biosynthetic process	8/3084	10/11512	0.000689967	RGN/C3/SCARB1/LDLR/SREBF1/NR1H3/FBXW7/GPLD1	8
BP	GO:1902803	regulation of synaptic vesicle transport	30/3084	67/11512	0.00112322	SLC2A4/PINK1/RIMS2/DNM1L/PREPL/GIT1/PFN2/CACNB2/RAB3A/STXBP5L/APBA2/DGKI/STXBP1/ADCY1/CSPG5/NLGN1/SYP/PPFIA2/SYN1/STX1A/APBA1/MAP2/RIMS3/SYT1/CHRNA5/RIMS1/GRIK5/CHRNB2/DRD2/CPLX2	30
BP	GO:1903305	regulation of regulated secretory pathway	52/3084	133/11512	0.00125498	SYT12/REST/CACNA1H/STXBP2/ITGAM/CEACAM1/STX4/RIMS2/DNM1L/PREPL/GIT1/PFN2/CACNB2/RAB3A/LYN/RAB3D/STXBP5L/GAB2/APBA2/MICAL1/DGKI/FOXF1/STXBP1/DOC2B/SCAMP5/ADCY1/CSPG5/TRIM9/SYT17/NLGN1/BAIAP3/SYP/PPFIA2/GATA2/SYN1/STX1A/APBA1/RAB15/SYT11/RIMS3/SYT1/KCNB1/CHRNA5/IL13RA2/RIMS1/GRIK5/CHRNB2/SYT5/CDK5R2/DRD2/CPLX2/SYT2	52
BP	GO:0051648	vesicle localization	89/3084	251/11512	0.00140386	NLGN3/SYT12/ARFGAP3/SLC2A4/STX11/MYO7A/PINK1/STX4/MCFD2/FYCO1/TRAPPC2L/KIF1C/RIMS2/ACTN4/SEC24A/SNAP23/CTSC/CDH2/DNM1L/TRAPPC2/PREPL/GIT1/DYNC1H1/VAMP2/NSF/PFN2/AP3M2/VPS33A/CACNB2/MAGI2/CLASP2/MYO5A/KIF5C/KIFAP3/KIF3A/RAB3A/SYNJ1/KIAA1107/PPFIA3/ERC2/STXBP5L/APBA2/SNCA/DGKI/STXBP1/SNPH/PCDH17/DOC2B/SYNDIG1/LIN7A/PCLO/SV2A/ADCY1/BRSK2/CSPG5/TRIM9/SYT17/NLGN1/AP3B2/DNM1/SYN2/SYP/PPFIA2/SNAP25/SYN1…	89
BP	GO:0016082	synaptic vesicle priming	10/3084	15/11512	0.00141878	SNAP23/RAB3A/SYNJ1/ERC2/SNCA/STXBP1/SV2A/SNAP25/STX1A/UNC13A	10
BP	GO:0031629	synaptic vesicle fusion to presynaptic active zone membrane	10/3084	15/11512	0.00141878	STX11/STX4/SNAP23/RAB3A/STXBP1/SNAP25/STX1A/SYT1/GRIK5/CPLX2	10
BP	GO:0099500	vesicle fusion to plasma membrane	10/3084	15/11512	0.00141878	STX11/STX4/SNAP23/RAB3A/STXBP1/SNAP25/STX1A/SYT1/GRIK5/CPLX2	10
BP	GO:0007416	synapse assembly	51/3084	131/11512	0.0015509	NLGN3/GPC4/SRPX2/FARP1/LRP4/RYK/MEF2C/DLG5/RAB29/EIF4G1/CDH2/BHLHB9/MAGI2/CLSTN1/SNCA/AGRN/NECTIN1/BSN/PCDH17/PCDHB6/ADGRL1/NRXN2/SYNDIG1/MAP1B/CLSTN3/PCLO/NLGN4X/CLSTN2/FLRT3/PCDHB3/EFNA5/PLXNB1/SPOCK2/ADGRB3/NLGN1/OXTR/GABRB3/ACHE/SDK2/NRG1/NRXN1/ADGRB2/GABRG2/GAP43/FLRT1/CHRNB2/ADD2/LRRTM2/NTRK1/DRD2/CBLN1	51
BP	GO:0036465	synaptic vesicle recycling	26/3084	57/11512	0.00169417	NLGN3/SLC2A4/SH3GL1/ITSN1/DNM1L/DNAJC6/VAMP4/RAB3A/SYNJ1/KIAA1107/SNCA/NLGN4X/SYT17/AMPH/NLGN1/DNM1/SYP/SNCB/STX1A/FGF14/SYT11/SYT1/SNAP91/SYT5/RAB27B/SYT2	26
BP	GO:0048485	sympathetic nervous system development	12/3084	20/11512	0.00179215	FZD3/SOX4/GATA3/ASCL1/HAND2/GFRA3/PHOX2A/PHOX2B/TFAP2B/INSM1/NTRK1/SOX11	12
BP	GO:0097104	postsynaptic membrane assembly	8/3084	11/11512	0.0019333	NLGN3/LRP4/CDH2/MAGI2/NRXN2/NLGN4X/NLGN1/NRXN1	8
BP	GO:0009081	branched-chain amino acid metabolic process	11/3084	18/11512	0.00227796	HIBCH/MCCC1/BCAT2/ACAT1/DBT/MCCC2/ALDH6A1/BCKDHA/HMGCL/AUH/DLD	11
BP	GO:0009083	branched-chain amino acid catabolic process	11/3084	18/11512	0.00227796	HIBCH/MCCC1/BCAT2/ACAT1/DBT/MCCC2/ALDH6A1/BCKDHA/HMGCL/AUH/DLD	11
BP	GO:0045956	positive regulation of calcium ion-dependent exocytosis	11/3084	18/11512	0.00227796	CACNA1H/DNM1L/CACNB2/STXBP1/DOC2B/SCAMP5/NLGN1/STX1A/SYT1/KCNB1/CDK5R2	11
BP	GO:0051588	regulation of neurotransmitter transport	47/3084	121/11512	0.00244582	SNCG/SYT12/KCNMB4/MAOB/RGS2/SLC30A1/RIMS2/MEF2C/DNM1L/PREPL/GIT1/PFN2/CACNB2/RAB3A/PER2/KCNC4/STXBP5L/APBA2/SNCA/DGKI/ABAT/STXBP1/ITGB3/SV2A/ADCY1/CSPG5/NLGN1/BAIAP3/SYP/PPFIA2/ASIC1/SYN1/STX1A/APBA1/RGS4/SYT11/UNC13A/RIMS3/SYT1/CHRNB4/CHRNA5/RIMS1/GRIK5/CHRNA3/CHRNB2/DRD2/CPLX2	47
BP	GO:0006635	fatty acid beta-oxidation	28/3084	64/11512	0.00247291	IRS1/HIBCH/ACADS/ACADM/ACADVL/BDH2/HADHB/ACAT1/ETFDH/DECR1/ECH1/ETFA/CPT2/ACAT2/ABCD1/CPT1A/ECHDC2/DECR2/ECI2/MLYCD/PPARA/ACAA1/HSD17B4/AUH/AMACR/MCAT/AKT2/SCP2	28
BP	GO:0009062	fatty acid catabolic process	36/3084	88/11512	0.00273126	IRS1/ALDH3A2/HIBCH/ACADS/PCCB/PCCA/ACADM/ACADVL/BDH2/HADHB/ACAT1/LIPE/ETFDH/DECR1/ECH1/ETFA/CPT2/PHYH/ACAT2/ABCD1/CPT1A/ECHDC2/DECR2/ECI2/MLYCD/PPARA/ACAA1/HSD17B4/AUH/AMACR/FAAH/MCAT/AKT2/SCP2/ABHD3/LPIN1	36
BP	GO:0099010	modification of postsynaptic structure	10/3084	16/11512	0.00287724	WASF3/ITSN1/SYNPO/PFN2/WASF1/BAIAP2/ARHGAP44/CTNNA2/TIAM1/CAMKV	10
BP	GO:0017157	regulation of exocytosis	66/3084	182/11512	0.00296603	SYT12/SDC1/RAB9A/REST/SDC4/CACNA1H/STXBP2/ITGAM/CEACAM1/STX4/RIMS2/RAPGEF4/DNM1L/PREPL/GIT1/VAMP2/NSF/PFN2/ATP6AP1/CACNB2/CLASP2/RAB3A/LYN/RAB3D/STXBP5L/GAB2/APBA2/MICAL1/SNCA/DGKI/FOXF1/STXBP1/DOC2B/SCAMP5/PCLO/ADCY1/CSPG5/TRIM9/SYT17/NLGN1/BAIAP3/RAB26/SYP/PPFIA2/GATA2/SMPD3/SYN1/STX1A/APBA1/RAB15/SYT11/CADPS/RIMS3/SYT1/KCNB1/CHRNA5/IL13RA2/RIMS1/GRIK5/CHRNB2/SYT5/CDK5R2/RAB27B/DRD2/CPLX2/SYT2	66
BP	GO:0006790	sulfur compound metabolic process	101/3084	297/11512	0.00324023	ACSF2/TST/DCN/PAPSS2/IDH1/CTH/SCD5/OPLAH/GSTA4/B4GALT5/PDK4/ST3GAL4/MPST/SLC26A1/LUM/OGN/UST/ST3GAL1/VCAN/SLC26A2/PCCB/PCCA/MCCC1/ACAT1/SLC35D1/ELOVL6/MCCC2/HYAL1/ELOVL5/BHMT2/SUCLG2/IBA57/TPST2/SUOX/DGAT1/ABCD1/SCD/PDK1/B4GALT1/SULT1A1/HMGCS1/UGDH/PC/GNS/AASS/SQOR/PDP1/TXN2/COMT/MLYCD/CTNS/GLRX2/GCLM/MMACHC/NUBP1/SMS/HSD17B4/DSE/HMGCL/PPCS/APIP/AHCYL1/DLD/GPX1/MVD/NFS1/ADI1/HSPA9/DLST/OXSM/STAT5…	101
BP	GO:0007158	neuron cell-cell adhesion	9/3084	14/11512	0.00359997	NLGN3/CDK5R1/NRXN2/NLGN4X/NLGN1/NRXN3/NRXN1/RET/TNR	9
BP	GO:0071625	vocalization behavior	9/3084	14/11512	0.00359997	NLGN3/SRPX2/DLG4/NRXN2/NLGN4X/NRXN3/BRINP1/NRXN1/CNTNAP2	9
BP	GO:0010976	positive regulation of neuron projection development	83/3084	239/11512	0.00383242	APOE/SLIT2/CAMK1/CXCR4/ZEB2/RGS2/PRKD1/KALRN/RIMS2/SMURF1/LLPH/DLG5/CFLAR/ITSN1/ATF1/DNM1L/RAPGEF2/KIDINS220/CPEB3/GRN/APBB1/BHLHB9/PAK1/TENM3/MAGI2/LIMK1/METRN/CBFA2T2/CAMK1D/GDI1/CRTC1/DLG4/PPP2R5B/SEMA5A/RUFY3/LYN/LRP8/PLXNA3/BAIAP2/FN1/RND2/FYN/FEZ1/ITGA6/FGFR1/MAP1B/FKBP1B/PLXNC1/SERPINI1/ATP8A2/DBN1/PTK7/EPHA3/PLXNA2/SYT17/EFNA5/GRIP1/PLXNB1/NLGN1/CNTN1/DPYSL3/TIAM1/PTN/ALK/UNC13A/PTK6/PAK3…	83
BP	GO:0045666	positive regulation of neuron differentiation	105/3084	312/11512	0.00392492	APOE/SLIT2/CAMK1/CXCR4/REST/BMP4/ZEB2/RGS2/PRKD1/KALRN/RIMS2/SMURF1/LLPH/MEF2C/BCL6/DLG5/EIF4G1/CFLAR/ITSN1/ETV5/ATF1/DNM1L/TCF4/RAPGEF2/KIDINS220/CPEB3/GRN/APBB1/BHLHB9/DNMT3B/PAK1/RARA/TENM3/MAGI2/ZEB1/LIMK1/METRN/CBFA2T2/CAMK1D/GDI1/CRTC1/DLG4/PPP2R5B/SEMA5A/RUFY3/LYN/LRP8/PLXNA3/NAP1L2/BAIAP2/FN1/RND2/FYN/MMD/FEZ1/ITGA6/FGFR1/BCL2/TRPC6/MAP1B/FKBP1B/PLXNC1/SERPINI1/ATP8A2/DBN1/GDPD5/PTK7/EPHA…	105
BP	GO:0010996	response to auditory stimulus	11/3084	19/11512	0.00410818	USP53/SLC1A3/NRXN2/ATP8A2/NRXN1/PTN/KCNC1/KIAA0319/DRD2/STRA6/CNTNAP2	11
BP	GO:0086064	cell communication by electrical coupling involved in cardiac conduction	11/3084	19/11512	0.00410818	GJA1/ATP1A1/ATP1B1/FKBP1B/GJC1/PDE4D/SLC8A1/PKP2/CACNA1C/RYR2/ATP1A3	11
BP	GO:2000300	regulation of synaptic vesicle exocytosis	27/3084	63/11512	0.00415643	RIMS2/DNM1L/PREPL/GIT1/PFN2/CACNB2/RAB3A/STXBP5L/APBA2/DGKI/STXBP1/ADCY1/CSPG5/NLGN1/SYP/PPFIA2/SYN1/STX1A/APBA1/RIMS3/SYT1/CHRNA5/RIMS1/GRIK5/CHRNB2/DRD2/CPLX2	27
BP	GO:0048168	regulation of neuronal synaptic plasticity	20/3084	43/11512	0.00425496	STAR/APOE/SYNPO/NCDN/SYNGR1/DLG4/RAB3A/PPFIA3/SNCA/NSMF/DBN1/S100B/SYP/GRIK2/ARC/UNC13A/NEURL1/SLC8A2/CAMK2B/DRD2	20
BP	GO:0032411	positive regulation of transporter activity	34/3084	84/11512	0.00431798	RGN/NLGN3/PRKCD/ABCB1/SGK1/ATP1B3/TESC/CCL2/PLCG2/GLRX/HSPA2/NIPSNAP2/PINK1/ACTN4/TMSB4X/STIM1/KMT2A/CACNB2/CACNA2D1/STK39/ANK2/ATP1B1/TRPC6/NOS1AP/AKAP6/STAC/CACNB3/ARC/FGF14/KCNC1/SYNGR3/RYR2/CACNG4/CACNG2	34
BP	GO:0021694	cerebellar Purkinje cell layer formation	7/3084	10/11512	0.0053376	RORA/WHRN/ATP7A/LDB1/AGTPBP1/FAIM2/CEND1	7
BP	GO:0042415	norepinephrine metabolic process	7/3084	10/11512	0.0053376	AKR1B1/ATP7A/GATA3/TH/HAND2/DBH/INSM1	7
BP	GO:0048172	regulation of short-term neuronal synaptic plasticity	7/3084	10/11512	0.0053376	SYNGR1/RAB3A/PPFIA3/SYP/GRIK2/UNC13A/SLC8A2	7
BP	GO:1904321	response to forskolin	7/3084	10/11512	0.0053376	FDX1/AHR/GNAI1/ADCY3/ADCY2/ADCY1/EFNA5	7
BP	GO:1904322	cellular response to forskolin	7/3084	10/11512	0.0053376	FDX1/AHR/GNAI1/ADCY3/ADCY2/ADCY1/EFNA5	7
BP	GO:0014047	glutamate secretion	19/3084	41/11512	0.00554237	AVPR1A/SLC1A3/GLS/SLC38A2/VAMP2/RAB3A/PPFIA3/SNCA/STXBP1/SLC1A1/GLS2/PPFIA2/SNAP25/STX1A/APBA1/PPFIA4/SYT1/RIMS1/ADORA1	19
BP	GO:0048483	autonomic nervous system development	19/3084	41/11512	0.00554237	VCAM1/FZD3/ADARB1/SOX4/PLXNA3/NAV2/FN1/GATA3/ASCL1/TLX2/RET/HAND2/GFRA3/PHOX2A/PHOX2B/TFAP2B/INSM1/NTRK1/SOX11	19
BP	GO:0006865	amino acid transport	43/3084	113/11512	0.00563018	AVPR1A/SLC6A9/SLC6A6/LRRC8D/SLC16A10/SLC43A1/SLC11A1/RGS2/SLC1A3/CTNS/SLC6A8/GLS/SLC38A2/SLC3A2/SLC25A12/VAMP2/SLC25A22/PRAF2/RAB3A/SLC7A4/SLC17A5/SLC36A1/PER2/STK39/PPFIA3/SNCA/ABAT/STXBP1/SLC1A1/GLS2/SV2A/SLC38A1/XK/SLC7A5/PPFIA2/SNAP25/STX1A/APBA1/RGS4/PPFIA4/SYT1/RIMS1/ADORA1	43
BP	GO:0051965	positive regulation of synapse assembly	21/3084	47/11512	0.00613749	NLGN3/SRPX2/DLG5/BHLHB9/CLSTN1/AGRN/ADGRL1/SYNDIG1/CLSTN3/CLSTN2/FLRT3/EFNA5/ADGRB3/NLGN1/OXTR/NRXN1/ADGRB2/FLRT1/LRRTM2/NTRK1/CBLN1	21
BP	GO:0001941	postsynaptic membrane organization	16/3084	33/11512	0.00619852	APOE/NLGN3/CHRNB1/LRP4/RER1/DNAJA3/ETV5/CDH2/MAGI2/DLG4/GLRB/NRXN2/NLGN4X/NLGN1/NRXN1/PTN	16
BP	GO:0050807	regulation of synapse organization	61/3084	171/11512	0.0062971	APOE/NLGN3/GPC4/CAMK1/SRPX2/LRP4/KALRN/MEF2C/DLG5/EIF4G1/ITSN1/ETV5/CDH2/DNM1L/ABI2/DCTN1/BHLHB9/CLSTN1/PRNP/LZTS3/ARHGAP33/TUBA1A/LRP8/BAIAP2/SNCA/FYN/AGRN/NECTIN1/ADGRL1/ARHGAP44/CDK5R1/SYNDIG1/ARHGAP22/CLSTN3/DBN1/CLSTN2/FLRT3/EFNA5/ADGRB3/NLGN1/OXTR/PTPRO/CTNNA2/TIAM1/NRXN1/PTN/ADGRB2/DGKB/ARC/PAK3/GAP43/NEURL1/FLRT1/CAMK2B/CHRNB2/INS/LRRTM2/NTRK1/DRD2/CAMKV/CBLN1	61
BP	GO:0032409	regulation of transporter activity	72/3084	207/11512	0.00645457	RGN/GJA1/NLGN3/PPIF/PRKCD/ABCB1/SLC9A3R1/SGK1/ATP1B3/FGF12/TESC/CCL2/PLCG2/GPD1L/GLRX/HSPA2/NIPSNAP2/PINK1/ACTN4/AHCYL1/MEF2C/TMSB4X/WWP2/NDFIP1/STIM1/KMT2A/FHL1/VAMP2/ATP7A/DLG3/CACNB2/PRNP/MYO5A/DLG4/CACNA2D1/YWHAH/STK39/ANK2/GNB5/MAPK8IP2/KCNAB1/SNCA/CACNB1/ATP1B1/BCL2/PRKCE/TRPC6/FKBP1B/NOS1AP/PDE4D/AKAP6/STAC/CACNB3/NLGN1/HPCA/SCN2B/GRIN2A/SCN3B/ARC/FGF14/KCNC1/SYNGR3/GRIA2/GRIA4/MMP9/NEFL/R…	72
BP	GO:0007610	behavior	157/3084	494/11512	0.00668314	STAR/AVPR1A/APOE/GJA1/NLGN3/LDLR/GPR157/SNCG/PTGDS/SGK1/PRKAR2B/CHRNB1/EGFR/USP2/ITPR3/NPC1/THRB/FGF12/NPY1R/CEBPB/GATM/NQO2/SRPX2/HIF1A/OXR1/SLC1A3/ID2/HMGCR/CPT1A/TSPO/MEIS1/KALRN/COMT/CTNS/PPARA/EIF4A3/GM2A/EIF4EBP2/CAPN2/GLS/MEF2C/PBX3/EIF4G1/ETV5/SYNPO/FADD/APRT/DCTN1/CPEB3/AHI1/ATP7A/BHLHB9/ADCY3/WFS1/ADARB1/SLC12A5/PRNP/MYO5A/CRTC1/RIN1/NR1D2/DLG4/TMOD1/SYNJ1/CFAP20/ABCA7/GLRB/MAPK8IP2/APB…	157
BP	GO:0061001	regulation of dendritic spine morphogenesis	17/3084	36/11512	0.0067526	NLGN3/KALRN/DNM1L/ABI2/BHLHB9/LZTS3/ARHGAP33/LRP8/BAIAP2/ARHGAP44/CDK5R1/DBN1/NLGN1/TIAM1/ARC/PAK3/CAMK2B	17
BP	GO:0015800	acidic amino acid transport	25/3084	59/11512	0.00678541	AVPR1A/LRRC8D/SLC1A3/GLS/SLC38A2/SLC25A12/VAMP2/SLC25A22/PRAF2/RAB3A/PER2/PPFIA3/SNCA/ABAT/STXBP1/SLC1A1/GLS2/PPFIA2/SNAP25/STX1A/APBA1/PPFIA4/SYT1/RIMS1/ADORA1	25
BP	GO:0140029	exocytic process	26/3084	62/11512	0.00685773	STX11/STXBP2/STX4/SYTL2/SNAP23/VPS33A/RAB3A/SYNJ1/DMTN/LYN/RAB3D/PPFIA3/ERC2/SNCA/STXBP1/SNPH/SV2A/NLGN1/SNAP25/STX1A/RAB15/UNC13A/SYT1/KCNB1/GRIK5/CPLX2	26
BP	GO:0033865	nucleoside bisphosphate metabolic process	40/3084	105/11512	0.00724038	ACSF2/PAPSS2/SCD5/PDK4/SLC26A1/SLC26A2/ACAT1/ELOVL6/MCCC2/ELOVL5/SUCLG2/TPST2/DGAT1/ABCD1/SCD/HMGCR/PDK1/SULT1A1/HMGCS1/AASS/PDP1/MLYCD/HSD17B4/HMGCL/PPCS/DLD/MVD/DLST/OXSM/GSTZ1/COASY/ACOT9/PAPSS1/ACOT11/ACSL6/SNCA/ACOT7/FAR2/ELOVL4/SULT4A1	40
BP	GO:0033875	ribonucleoside bisphosphate metabolic process	40/3084	105/11512	0.00724038	ACSF2/PAPSS2/SCD5/PDK4/SLC26A1/SLC26A2/ACAT1/ELOVL6/MCCC2/ELOVL5/SUCLG2/TPST2/DGAT1/ABCD1/SCD/HMGCR/PDK1/SULT1A1/HMGCS1/AASS/PDP1/MLYCD/HSD17B4/HMGCL/PPCS/DLD/MVD/DLST/OXSM/GSTZ1/COASY/ACOT9/PAPSS1/ACOT11/ACSL6/SNCA/ACOT7/FAR2/ELOVL4/SULT4A1	40
BP	GO:0034032	purine nucleoside bisphosphate metabolic process	40/3084	105/11512	0.00724038	ACSF2/PAPSS2/SCD5/PDK4/SLC26A1/SLC26A2/ACAT1/ELOVL6/MCCC2/ELOVL5/SUCLG2/TPST2/DGAT1/ABCD1/SCD/HMGCR/PDK1/SULT1A1/HMGCS1/AASS/PDP1/MLYCD/HSD17B4/HMGCL/PPCS/DLD/MVD/DLST/OXSM/GSTZ1/COASY/ACOT9/PAPSS1/ACOT11/ACSL6/SNCA/ACOT7/FAR2/ELOVL4/SULT4A1	40
BP	GO:0051650	establishment of vesicle localization	81/3084	238/11512	0.00760351	SYT12/ARFGAP3/SLC2A4/STX11/MYO7A/PINK1/STX4/MCFD2/FYCO1/TRAPPC2L/KIF1C/RIMS2/ACTN4/SEC24A/SNAP23/CTSC/DNM1L/TRAPPC2/PREPL/GIT1/DYNC1H1/VAMP2/NSF/PFN2/AP3M2/CACNB2/CLASP2/MYO5A/KIF5C/KIFAP3/KIF3A/RAB3A/SYNJ1/KIAA1107/PPFIA3/ERC2/STXBP5L/APBA2/SNCA/DGKI/STXBP1/SNPH/DOC2B/LIN7A/PCLO/SV2A/ADCY1/CSPG5/TRIM9/SYT17/NLGN1/AP3B2/DNM1/SYP/PPFIA2/SNAP25/SYN1/DYNC1I1/STX1A/APBA1/MAP2/SYT11/BICDL1/CADPS/UNC13…	81
BP	GO:0051962	positive regulation of nervous system development	143/3084	448/11512	0.00793657	STAR/APOE/SLIT2/NLGN3/CAMK1/WASF3/CXCR4/REST/BMP4/SRPX2/ZEB2/HIF1A/SEMA6A/CSF1/RGS2/ID2/SMO/PRKD1/MAN2A1/TSPO/KALRN/GLI3/RIMS2/SMURF1/LLPH/MEF2C/BCL6/DLG5/EIF4G1/CFLAR/ITSN1/ETV5/PARD3/ATF1/DNM1L/TCF4/RAPGEF2/KIDINS220/FZD3/CPEB3/SLC25A12/GRN/APBB1/BHLHB9/DNMT3B/PAK1/RARA/TENM3/MAGI2/CLSTN1/XRCC2/ZEB1/LIMK1/METRN/CBFA2T2/CAMK1D/GDI1/CRTC1/DLG4/PPP2R5B/SEMA5A/RUFY3/LYN/LRP8/PLXNA3/NAP1L2/BAIAP2/FN…	143
BP	GO:0021535	cell migration in hindbrain	8/3084	13/11512	0.00884134	LEF1/RBFOX2/TTBK2/PLXNA2/DAB1/CTNNA2/PHOX2B/CEND1	8
BP	GO:0099558	maintenance of synapse structure	8/3084	13/11512	0.00884134	DCTN1/DLG3/RAB3A/ERC2/BSN/PCLO/ADGRB3/C1QL1	8
BP	GO:0086014	atrial cardiac muscle cell action potential	10/3084	18/11512	0.00912135	KCNQ1/GJA1/KCNN2/KCNJ5/CACNB2/ANK2/GJC1/CACNA1C/SCN3B/RYR2	10
BP	GO:0086026	atrial cardiac muscle cell to AV node cell signaling	10/3084	18/11512	0.00912135	KCNQ1/GJA1/KCNN2/KCNJ5/CACNB2/ANK2/GJC1/CACNA1C/SCN3B/RYR2	10
BP	GO:0086066	atrial cardiac muscle cell to AV node cell communication	10/3084	18/11512	0.00912135	KCNQ1/GJA1/KCNN2/KCNJ5/CACNB2/ANK2/GJC1/CACNA1C/SCN3B/RYR2	10
BP	GO:0050803	regulation of synapse structure or activity	62/3084	177/11512	0.00922417	APOE/NLGN3/GPC4/CAMK1/SRPX2/LRP4/KALRN/MEF2C/DLG5/EIF4G1/ITSN1/ETV5/CDH2/DNM1L/ABI2/DCTN1/BHLHB9/CLSTN1/PRNP/LZTS3/ARHGAP33/TUBA1A/LRP8/BAIAP2/SNCA/FYN/AGRN/NECTIN1/ADGRL1/ARHGAP44/CDK5R1/SYNDIG1/ARHGAP22/CLSTN3/DBN1/CLSTN2/FLRT3/EFNA5/ADGRB3/NLGN1/OXTR/PTPRO/CTNNA2/DNM1/TIAM1/NRXN1/PTN/ADGRB2/DGKB/ARC/PAK3/GAP43/NEURL1/FLRT1/CAMK2B/CHRNB2/INS/LRRTM2/NTRK1/DRD2/CAMKV/CBLN1	62
BP	GO:0030534	adult behavior	44/3084	119/11512	0.00925392	NLGN3/SNCG/CHRNB1/NPC1/FGF12/OXR1/ID2/KALRN/CTNS/PPARA/PBX3/FADD/TMOD1/GLRB/SNCA/ABAT/PCDH17/NRXN2/ZFHX2/NLGN4X/INPP5F/DAB1/OPRD1/SPTBN4/NRXN3/NRXN1/ALK/CARTPT/GABRG2/SEZ6L/UCHL1/CHRNB4/CHRNA5/EFNB3/CEND1/DBH/CHRNA3/CHRNB2/DRD2/PAX5/CNTNAP2/OPRM1/NPY/OPRK1	44
BP	GO:0060999	positive regulation of dendritic spine development	17/3084	37/11512	0.00942446	APOE/CAMK1/KALRN/LLPH/DLG5/ITSN1/DNM1L/CPEB3/BHLHB9/LRP8/BAIAP2/DBN1/NLGN1/TIAM1/PAK3/NEURL1/CAMK2B	17
BP	GO:0014046	dopamine secretion	13/3084	26/11512	0.00964486	SNCG/SYT12/PINK1/SNCA/ABAT/SYT17/SYT11/SYT1/CHRNB2/SYT5/DRD2/SYT2/OPRK1	13
BP	GO:0014059	regulation of dopamine secretion	13/3084	26/11512	0.00964486	SNCG/SYT12/PINK1/SNCA/ABAT/SYT17/SYT11/SYT1/CHRNB2/SYT5/DRD2/SYT2/OPRK1	13
BP	GO:0006023	aminoglycan biosynthetic process	35/3084	91/11512	0.00973985	DCN/GPC4/B4GALT5/ST3GAL4/SDC3/SDC1/LUM/OGN/UST/ST3GAL1/VCAN/SDC4/SLC35D1/HYAL1/B4GALT1/HS6ST1/UGDH/DSE/EXT1/CHSY1/NFKB1/ABCC5/B3GNT2/SLC35D2/CHPF/B4GAT1/SDC2/AGRN/CSPG4/CHST7/CSPG5/HS3ST2/SMPD3/CHST1/B3GNT4	35
BP	GO:0006024	glycosaminoglycan biosynthetic process	35/3084	91/11512	0.00973985	DCN/GPC4/B4GALT5/ST3GAL4/SDC3/SDC1/LUM/OGN/UST/ST3GAL1/VCAN/SDC4/SLC35D1/HYAL1/B4GALT1/HS6ST1/UGDH/DSE/EXT1/CHSY1/NFKB1/ABCC5/B3GNT2/SLC35D2/CHPF/B4GAT1/SDC2/AGRN/CSPG4/CHST7/CSPG5/HS3ST2/SMPD3/CHST1/B3GNT4	35
BP	GO:0099565	chemical synaptic transmission, postsynaptic	35/3084	91/11512	0.00973985	NLGN3/CHRNB1/EIF4A3/RIMS2/MEF2C/SH3GL1/DLG4/GLRB/MAPK8IP2/BAIAP2/SNCA/DGKI/ABAT/NLGN4X/P2RX6/CACNB3/NLGN1/GABRB3/IGSF9B/NRXN1/GRIK2/STX1A/GRIN2A/RGS4/MPP2/CHRNB4/CHRNA5/RIMS1/GRIK5/CHRNA3/CHRNB2/ADORA1/DRD2/CBLN1/OPRM1	35
BP	GO:0034440	lipid oxidation	34/3084	88/11512	0.00993914	IRS1/ALDH3A2/PDK4/POR/HIBCH/ACADS/ACADM/ACADVL/BDH2/HADHB/ACAT1/APOD/ETFDH/ADIPOR2/DECR1/ECH1/ETFA/CPT2/PHYH/ACAT2/ABCD1/CPT1A/ECHDC2/DECR2/ECI2/MLYCD/PPARA/ACAA1/HSD17B4/AUH/AMACR/MCAT/AKT2/SCP2	34
BP	GO:0072329	monocarboxylic acid catabolic process	40/3084	107/11512	0.0103508	IRS1/ALDH3A2/FAH/HIBCH/ACADS/PCCB/PCCA/ACADM/ACADVL/BDH2/HADHB/ACAT1/LIPE/SORD/ETFDH/DECR1/ECH1/ETFA/CPT2/PHYH/ACAT2/ABCD1/CPT1A/ECHDC2/DECR2/ECI2/MLYCD/PPARA/ACAA1/HSD17B4/AUH/AMACR/FAAH/MCAT/AKT2/SCP2/ABHD3/LPIN1/ASRGL1/ABAT	40
BP	GO:0006584	catecholamine metabolic process	20/3084	46/11512	0.0105788	AKR1B1/MAOB/MAOA/SULT1A1/ITGAM/COMT/ATP7A/SNCA/ABAT/GCH1/GATA3/SNCB/GRIN2A/TH/HAND2/DBH/DDC/CHRNB2/INSM1/DRD2	20
BP	GO:0009712	catechol-containing compound metabolic process	20/3084	46/11512	0.0105788	AKR1B1/MAOB/MAOA/SULT1A1/ITGAM/COMT/ATP7A/SNCA/ABAT/GCH1/GATA3/SNCB/GRIN2A/TH/HAND2/DBH/DDC/CHRNB2/INSM1/DRD2	20
BP	GO:0031102	neuron projection regeneration	21/3084	49/11512	0.0107992	APOD/KLF4/CTNNA1/LAMB2/TSPO/CERS2/GRN/MAP4K4/PTPRF/MAPK8IP3/ADM/BCL2/MAP1B/FKBP1B/THY1/INPP5F/PTN/GAP43/TNR/NEFL/ISL1	21
BP	GO:0099173	postsynapse organization	49/3084	136/11512	0.0108717	APOE/NLGN3/CHRNB1/LRP4/KALRN/RER1/DNAJA3/CTTN/ETV5/CDH2/WASF2/DNM1L/ABI2/ACTN1/BHLHB9/DLG3/MAGI2/PRNP/LZTS3/ARHGAP33/DLG4/GLRB/LRP8/BAIAP2/FYN/ARHGAP44/CDK5R1/NRXN2/NOS1AP/ARHGAP22/NLGN4X/DBN1/CNKSR2/NLGN1/TIAM1/NRXN1/PTN/DGKB/ARC/PAK3/GAP43/ZNF365/INA/CTNND2/NEFL/CAMK2B/INS/LRRTM2/CBLN1	49
BP	GO:0019432	triglyceride biosynthetic process	11/3084	21/11512	0.0110864	RGN/C3/SCARB1/LDLR/SREBF1/NR1H3/DGAT1/GK/FBXW7/LPIN1/GPLD1	11
BP	GO:0099563	modification of synaptic structure	11/3084	21/11512	0.0110864	WASF3/REST/ITSN1/SYNPO/PFN2/WASF1/BAIAP2/ARHGAP44/CTNNA2/TIAM1/CAMKV	11
BP	GO:0032272	negative regulation of protein polymerization	24/3084	58/11512	0.0110956	SLIT2/RDX/PRKCD/HIP1R/LMOD1/CARMIL1/TMSB4X/SPTBN1/ADD3/PFN2/VILL/SPTBN5/TMOD1/DMTN/SNCA/TMOD2/STMN1/INPP5J/SPTBN4/CLIP3/MAP2/SPTB/ADD2/STMN2	24
BP	GO:0034111	negative regulation of homotypic cell-cell adhesion	7/3084	11/11512	0.0112951	RDX/PRKCD/PRKG1/C1QTNF1/CEACAM1/ABAT/SERPINE2	7
BP	GO:0098885	modification of postsynaptic actin cytoskeleton	7/3084	11/11512	0.0112951	WASF3/ITSN1/PFN2/WASF1/BAIAP2/CTNNA2/TIAM1	7
BP	GO:0031345	negative regulation of cell projection organization	55/3084	156/11512	0.0118207	SEMA3B/APOE/SLIT2/NLGN3/RAP1GAP/PRKCD/NR2F1/SEMA6A/LRP4/SPART/CERS2/CIB1/RYK/RAB29/RAPGEF2/MAP4/PFN2/EVL/MAP4K4/PAQR3/PRNP/CBFA2T2/GDI1/SEMA5A/RUFY3/YWHAH/CCP110/SEMA3G/PLXNA3/SEMA4F/FYN/ARHGAP44/CDK5R1/TRPC6/SEMA6C/THY1/SEMA6D/INPP5F/DAB1/RAP1GAP2/NLGN1/INPP5J/ITM2C/PTPRO/DPYSL3/CRMP1/MAP2/TLX2/TRIM46/KIAA0319/ZNF365/TNR/EFNB3/STMN2/RIT2	55
BP	GO:0021533	cell differentiation in hindbrain	9/3084	16/11512	0.0120076	RORA/ATP7A/LDB1/AGTPBP1/GATA2/FAIM2/PHOX2B/CEND1/CBLN1	9
BP	GO:0090330	regulation of platelet aggregation	9/3084	16/11512	0.0120076	PRKCD/PRKG1/C1QTNF1/CEACAM1/PRKCA/DMTN/LYN/ABAT/SERPINE2	9
BP	GO:0051261	protein depolymerization	34/3084	89/11512	0.0120303	RDX/ASPH/LMOD1/CARMIL1/CIB1/SH3GL1/SPTBN1/CKAP2/MAP1S/KIF2A/ADD3/TTBK2/DNAJC6/VILL/CLASP2/KIF2C/SPTBN5/TMOD1/STMN3/SEMA5A/SYNJ1/DMTN/MICAL1/TMOD2/MAP1B/STMN1/KIF18B/SPTBN4/APC2/MAP1A/SPTB/ADD2/STMN4/STMN2	34
BP	GO:0019395	fatty acid oxidation	33/3084	86/11512	0.0123004	IRS1/ALDH3A2/PDK4/POR/HIBCH/ACADS/ACADM/ACADVL/BDH2/HADHB/ACAT1/ETFDH/ADIPOR2/DECR1/ECH1/ETFA/CPT2/PHYH/ACAT2/ABCD1/CPT1A/ECHDC2/DECR2/ECI2/MLYCD/PPARA/ACAA1/HSD17B4/AUH/AMACR/MCAT/AKT2/SCP2	33
BP	GO:0045746	negative regulation of Notch signaling pathway	16/3084	35/11512	0.012305	EGFR/NFKBIA/BCL6/WWP2/FBXW7/CBFA2T2/HEY2/JAG2/CHAC1/NOTCH3/HEY1/GDPD5/GATA2/NEURL1/DLX2/BMP7	16
BP	GO:0010644	cell communication by electrical coupling	12/3084	24/11512	0.0127453	GJA1/ATP1A1/ATP1B1/FKBP1B/GJC1/PDE4D/SLC8A1/PKP2/DBN1/CACNA1C/RYR2/ATP1A3	12
BP	GO:0051899	membrane depolarization	31/3084	80/11512	0.0128166	DCN/GJA1/FGF12/GPD1L/CACNA1H/ABCD1/TSPO/SRC/GCLM/FHL1/CACNB2/CACNA2D1/YWHAH/ANK2/BCL2/SCN8A/SLC8A1/CACNA1C/CACNB3/MLLT11/SCN2B/HCN4/KCNH2/SCN3B/SCN2A/SCN9A/CACNA1B/SCN3A/CHRNB2/CACNG4/CACNG2	31
BP	GO:0032414	positive regulation of ion transmembrane transporter activity	30/3084	77/11512	0.0130579	RGN/NLGN3/ABCB1/ATP1B3/TESC/CCL2/PLCG2/GLRX/HSPA2/NIPSNAP2/PINK1/ACTN4/TMSB4X/STIM1/CACNB2/CACNA2D1/STK39/ANK2/ATP1B1/TRPC6/NOS1AP/AKAP6/STAC/CACNB3/ARC/FGF14/KCNC1/RYR2/CACNG4/CACNG2	30
BP	GO:0098930	axonal transport	19/3084	44/11512	0.0136398	HIF1A/KIF1C/DYNC1H1/AP3M2/KIF5C/MAPK8IP3/KIF3A/FEZ1/KIF4A/AP3B2/MAP1A/MAP2/UCHL1/TRIM46/NEFL/KIF5A/MAPT/KIF1A/RAB27B	19
BP	GO:0060998	regulation of dendritic spine development	25/3084	62/11512	0.0139628	APOE/NLGN3/CAMK1/KALRN/LLPH/MEF2C/DLG5/ITSN1/DNM1L/ABI2/CPEB3/BHLHB9/LZTS3/ARHGAP33/LRP8/BAIAP2/ARHGAP44/CDK5R1/DBN1/NLGN1/TIAM1/ARC/PAK3/NEURL1/CAMK2B	25
BP	GO:0090181	regulation of cholesterol metabolic process	21/3084	50/11512	0.0140129	APOE/LDLR/TM7SF2/DHCR7/POR/LDLRAP1/SCAP/ACADVL/SREBF1/FDPS/ELOVL6/SCD/HMGCR/EPHX2/HMGCS1/IDI1/FDFT1/MVD/SQLE/GNB3/FGF1	21
BP	GO:0008088	axo-dendritic transport	22/3084	53/11512	0.0140848	KIF17/HIF1A/KIF1C/DYNC1H1/AP3M2/KIF5C/MAPK8IP3/KIF3A/WASF1/FEZ1/KIF4A/AP3B2/MAP1A/APBA1/MAP2/UCHL1/TRIM46/NEFL/KIF5A/MAPT/KIF1A/RAB27B	22
BP	GO:0035418	protein localization to synapse	22/3084	53/11512	0.0140848	GPC4/IQSEC2/CLSTN1/KIF5C/DLG4/MAPK8IP3/GRIP2/BAIAP2/BSN/ARHGAP44/NRXN2/CLSTN3/PCLO/GRIP1/NLGN1/NRXN1/SNAP25/MAP1A/GRIN2A/KIF5A/MAPT/RAB27B	22
BP	GO:1901021	positive regulation of calcium ion transmembrane transporter activity	14/3084	30/11512	0.015213	RGN/PLCG2/HSPA2/NIPSNAP2/STIM1/CACNB2/CACNA2D1/ANK2/ATP1B1/AKAP6/STAC/CACNB3/FGF14/RYR2	14
BP	GO:0022898	regulation of transmembrane transporter activity	67/3084	198/11512	0.0162162	RGN/GJA1/NLGN3/PPIF/ABCB1/SLC9A3R1/ATP1B3/FGF12/TESC/CCL2/PLCG2/GPD1L/GLRX/HSPA2/NIPSNAP2/PINK1/ACTN4/AHCYL1/MEF2C/TMSB4X/WWP2/STIM1/FHL1/VAMP2/ATP7A/DLG3/CACNB2/PRNP/MYO5A/DLG4/CACNA2D1/YWHAH/STK39/ANK2/GNB5/MAPK8IP2/KCNAB1/SNCA/CACNB1/ATP1B1/BCL2/PRKCE/TRPC6/FKBP1B/NOS1AP/PDE4D/AKAP6/STAC/CACNB3/NLGN1/HPCA/SCN2B/GRIN2A/SCN3B/ARC/FGF14/KCNC1/GRIA2/GRIA4/MMP9/NEFL/RYR2/CACNG4/INS/DRD2/CACNG2/OPRM1	67
BP	GO:0031103	axon regeneration	18/3084	42/11512	0.0175836	APOD/KLF4/CTNNA1/LAMB2/TSPO/CERS2/GRN/PTPRF/MAPK8IP3/BCL2/MAP1B/FKBP1B/INPP5F/PTN/GAP43/TNR/NEFL/ISL1	18
BP	GO:0051966	regulation of synaptic transmission, glutamatergic	24/3084	60/11512	0.0176009	NLGN3/EGFR/CCL2/MEF2C/CDH2/MAPK8IP2/DGKI/STXBP1/SERPINE2/NLGN1/OXTR/NRXN1/GRIK3/GRIK2/UNC13A/SYT1/TNR/CACNG4/ADORA1/NTRK1/DRD2/CACNG2/GRM8/ADCYAP1	24
BP	GO:0010771	negative regulation of cell morphogenesis involved in differentiation	33/3084	88/11512	0.0177692	SEMA3B/SLIT2/NLGN3/FBLN1/SEMA6A/LRP4/SPART/ACTN4/RYK/RAPGEF2/GDI1/SEMA5A/RUFY3/DMTN/YWHAH/SEMA3G/PLXNA3/SEMA4F/CDK5R1/TRPC6/SEMA6C/THY1/SEMA6D/DAB1/EFNA5/NLGN1/PTPRO/MAP2/TLX2/TRIM46/TNR/EFNB3/MELTF	33
BP	GO:0019915	lipid storage	22/3084	54/11512	0.0178853	APOE/C3/SCARB1/SOAT1/ABCA1/PLIN2/ZC3H12A/NR1H3/DGAT1/NFKBIA/SIRT1/PPARA/EHD1/GM2A/NRIP1/PNPLA2/OSBPL11/SQLE/NFKB1/FBXW7/ITGB3/B4GALNT1	22
BP	GO:0060079	excitatory postsynaptic potential	32/3084	85/11512	0.0182538	NLGN3/CHRNB1/EIF4A3/RIMS2/MEF2C/SH3GL1/DLG4/GLRB/MAPK8IP2/BAIAP2/SNCA/DGKI/NLGN4X/P2RX6/CACNB3/NLGN1/NRXN1/GRIK2/STX1A/GRIN2A/RGS4/MPP2/CHRNB4/CHRNA5/RIMS1/GRIK5/CHRNA3/CHRNB2/ADORA1/DRD2/CBLN1/OPRM1	32
BP	GO:0071804	cellular potassium ion transport	53/3084	153/11512	0.0190102	KCNQ1/KCNN2/KCNK3/ATP1B3/SLC12A2/KCNJ5/KCNMB4/SLC1A3/SLC12A4/WWP2/SLC9A8/FHL1/VAMP2/ATP1A1/SLC9A6/SLC12A5/PRNP/SLC9A7/KCNAB2/STK39/ANK2/KCNC4/KCNAB1/SLC9A5/KCNK15/ATP1B1/NOS1AP/KCNK7/KCNJ12/KCNMA1/KCNC3/AKAP6/KCND1/KCNMB2/KCNN3/KCNQ3/HCN4/SNAP25/KCNH2/SLC24A2/RGS4/KCNC1/DPP6/KCNB1/KCNQ2/ATP1A3/KCNH1/KCNA3/KCNH6/KCNB2/KCNK12/KCNJ6/OPRK1	53
BP	GO:0071805	potassium ion transmembrane transport	53/3084	153/11512	0.0190102	KCNQ1/KCNN2/KCNK3/ATP1B3/SLC12A2/KCNJ5/KCNMB4/SLC1A3/SLC12A4/WWP2/SLC9A8/FHL1/VAMP2/ATP1A1/SLC9A6/SLC12A5/PRNP/SLC9A7/KCNAB2/STK39/ANK2/KCNC4/KCNAB1/SLC9A5/KCNK15/ATP1B1/NOS1AP/KCNK7/KCNJ12/KCNMA1/KCNC3/AKAP6/KCND1/KCNMB2/KCNN3/KCNQ3/HCN4/SNAP25/KCNH2/SLC24A2/RGS4/KCNC1/DPP6/KCNB1/KCNQ2/ATP1A3/KCNH1/KCNA3/KCNH6/KCNB2/KCNK12/KCNJ6/OPRK1	53
BP	GO:0006637	acyl-CoA metabolic process	30/3084	79/11512	0.0192176	ACSF2/SCD5/PDK4/ACAT1/ELOVL6/ELOVL5/SUCLG2/DGAT1/ABCD1/SCD/PDK1/HMGCS1/AASS/PDP1/MLYCD/HSD17B4/HMGCL/PPCS/DLD/MVD/DLST/OXSM/GSTZ1/ACOT9/ACOT11/ACSL6/SNCA/ACOT7/FAR2/ELOVL4	30
BP	GO:0035383	thioester metabolic process	30/3084	79/11512	0.0192176	ACSF2/SCD5/PDK4/ACAT1/ELOVL6/ELOVL5/SUCLG2/DGAT1/ABCD1/SCD/PDK1/HMGCS1/AASS/PDP1/MLYCD/HSD17B4/HMGCL/PPCS/DLD/MVD/DLST/OXSM/GSTZ1/ACOT9/ACOT11/ACSL6/SNCA/ACOT7/FAR2/ELOVL4	30
BP	GO:0034505	tooth mineralization	9/3084	17/11512	0.0195317	ALPL/FOXO1/PPARA/TCIRG1/STIM1/CNNM4/NECTIN1/COL1A1/WNT6	9
BP	GO:0061003	positive regulation of dendritic spine morphogenesis	9/3084	17/11512	0.0195317	KALRN/DNM1L/BHLHB9/LRP8/BAIAP2/DBN1/TIAM1/PAK3/CAMK2B	9
BP	GO:0106027	neuron projection organization	29/3084	76/11512	0.0196915	APOE/NLGN3/ABCD1/KALRN/CTTN/DNM1L/ABI2/DCTN1/BHLHB9/PRNP/LZTS3/ARHGAP33/DLG4/LRP8/BAIAP2/FYN/ARHGAP44/CDK5R1/DBN1/NLGN1/TIAM1/MAP1A/ARC/PAK3/ZNF365/CTNND2/ATP1A3/CAMK2B/INS	29
BP	GO:0019216	regulation of lipid metabolic process	106/3084	332/11512	0.0199452	STAR/APOC1/AVPR1A/RGN/APOE/ALAS1/MLXIPL/C3/SCARB1/RARRES2/IRS1/VDR/IDH1/LDLR/PDGFRA/TM7SF2/G0S2/AGTR1/ABCA1/LSR/PRKCD/ABCB4/PLIN2/DHCR7/PDK4/POR/FHL2/LDLRAP1/SCAP/ACADM/REST/ACADVL/RORA/SREBF1/APOD/CLCN2/FDPS/CREBL2/ELOVL6/ADIPOR2/CYP27B1/GLIPR1/NR1H3/ELOVL5/KLF4/CPT2/ABCD1/SCD/ID2/HMGCR/PDK1/CPT1A/EPHX2/PRKD1/SIRT1/HMGCS1/TNFRSF1A/TSPO/PDP1/MLYCD/CEACAM1/IDI1/SRC/PPARA/PIK3R5/PEX11A/FDFT1/CISH/T…	106
BP	GO:0086019	cell-cell signaling involved in cardiac conduction	13/3084	28/11512	0.0200019	KCNQ1/GJA1/KCNN2/KCNJ5/CACNB2/CACNA2D1/ANK2/GJC1/PKP2/CACNA1C/HCN4/SCN3B/RYR2	13
BP	GO:0042475	odontogenesis of dentin-containing tooth	28/3084	73/11512	0.0201555	PDGFRA/LEF1/BMP4/FOXO1/LRP4/CSF1/SMO/CTNNA1/PPARA/GLI3/EDA/NFIC/TCIRG1/STIM1/HTRA1/CNNM4/PERP/ADM/JAG2/ITGA6/NECTIN1/WNT6/SMPD3/GNAO1/HAND1/HAND2/DLX2/BMP7	28
BP	GO:0061478	response to platelet aggregation inhibitor	7/3084	12/11512	0.0208951	FDX1/AHR/GNAI1/ADCY3/ADCY2/ADCY1/EFNA5	7
BP	GO:0098815	modulation of excitatory postsynaptic potential	14/3084	31/11512	0.0210376	NLGN3/EIF4A3/RIMS2/SH3GL1/DLG4/BAIAP2/NLGN4X/CACNB3/NLGN1/NRXN1/STX1A/RGS4/RIMS1/CBLN1	14
BP	GO:0007156	homophilic cell adhesion via plasma membrane adhesion molecules	38/3084	105/11512	0.0212559	ROBO3/CEACAM1/CDH2/TENM3/CLSTN1/DCHS1/PCDHB12/PTPRM/CADM1/PKD1/CELSR2/NECTIN1/PCDH17/PCDHB6/CDH13/PCDHGA1/CLSTN3/CDHR1/CLSTN2/PCDHB3/PCDH9/TRO/PCDH1/CDHR2/PCDHA3/DCHS2/IGSF9B/SDK2/CDH6/PCDHA10/CELSR3/CADM3/CDH18/RET/L1CAM/CDH7/CDH22/PCDH11X	38
BP	GO:0048678	response to axon injury	25/3084	64/11512	0.0214436	APOD/KLF4/CTNNA1/LAMB2/TSPO/CERS2/TXN2/GRN/PTPRF/MAPK8IP3/LYN/CDK1/BCL2/MAP1B/FKBP1B/FLRT3/INPP5F/DPYSL3/PTN/GAP43/TNR/NEFL/ISL1/NTRK1/DRD2	25
BP	GO:0016054	organic acid catabolic process	74/3084	224/11512	0.0215109	ALDH1L1/TST/LYVE1/IRS1/ALDH3A2/CTH/FAH/RIDA/MPST/HIBCH/ACADS/PCCB/PCCA/ACADM/ACADVL/BDH2/MCCC1/HADHB/BCAT2/ACAT1/LIPE/SORD/ETFDH/DECR1/DBT/ECH1/MCCC2/HYAL1/ETFA/CPT2/GCAT/PHYH/ACAT2/ABCD1/QPRT/DDAH1/CPT1A/ECHDC2/DECR2/AASS/ALDH7A1/ECI2/TXN2/MLYCD/ALDH6A1/PPARA/ACAA1/BCKDHA/HSD17B4/ENOSF1/HMGCL/SHMT1/AUH/DLD/GLS/GLUD1/DLST/GSTZ1/AMACR/FAAH/MCAT/AKT2/SCP2/ABHD3/PCYOX1L/FGF2/LPIN1/ASRGL1/QDPR/ABAT/C…	74
BP	GO:0046395	carboxylic acid catabolic process	74/3084	224/11512	0.0215109	ALDH1L1/TST/LYVE1/IRS1/ALDH3A2/CTH/FAH/RIDA/MPST/HIBCH/ACADS/PCCB/PCCA/ACADM/ACADVL/BDH2/MCCC1/HADHB/BCAT2/ACAT1/LIPE/SORD/ETFDH/DECR1/DBT/ECH1/MCCC2/HYAL1/ETFA/CPT2/GCAT/PHYH/ACAT2/ABCD1/QPRT/DDAH1/CPT1A/ECHDC2/DECR2/AASS/ALDH7A1/ECI2/TXN2/MLYCD/ALDH6A1/PPARA/ACAA1/BCKDHA/HSD17B4/ENOSF1/HMGCL/SHMT1/AUH/DLD/GLS/GLUD1/DLST/GSTZ1/AMACR/FAAH/MCAT/AKT2/SCP2/ABHD3/PCYOX1L/FGF2/LPIN1/ASRGL1/QDPR/ABAT/C…	74
BP	GO:0086010	membrane depolarization during action potential	15/3084	34/11512	0.021797	CACNA1H/CACNB2/CACNA2D1/YWHAH/ANK2/SCN8A/SLC8A1/CACNA1C/SCN2B/HCN4/KCNH2/SCN3B/SCN2A/SCN9A/SCN3A	15
BP	GO:0019218	regulation of steroid metabolic process	36/3084	99/11512	0.0227085	STAR/APOC1/APOE/VDR/LDLR/TM7SF2/AGTR1/DHCR7/POR/LDLRAP1/SCAP/REST/ACADVL/RORA/SREBF1/CLCN2/FDPS/ELOVL6/CYP27B1/SCD/HMGCR/EPHX2/SIRT1/HMGCS1/TSPO/IDI1/FDFT1/MVD/SQLE/NFKB1/ATP1A1/ADM/DKK3/GNB3/RORC/FGF1	36
BP	GO:0086065	cell communication involved in cardiac conduction	19/3084	46/11512	0.0228858	KCNQ1/GJA1/KCNN2/KCNJ5/ATP1A1/CACNB2/CACNA2D1/ANK2/ATP1B1/FKBP1B/GJC1/PDE4D/SLC8A1/PKP2/CACNA1C/HCN4/SCN3B/RYR2/ATP1A3	19
BP	GO:0051668	localization within membrane	44/3084	125/11512	0.0231443	APOE/GPC4/KIF17/LRP4/RER1/SEC24A/DNAJA3/ETV5/EPS15/CDH2/CD81/IQSEC2/CEP112/DLG3/MAGI2/CLSTN1/KIF5C/DLG4/GLRB/GRIP2/AGRN/ARHGAP44/ATP1B1/CDH13/NRXN2/ITGB3/THY1/DBN1/GRIP1/NLGN1/CALY/DNM1/HPCA/NRXN1/SNAP25/PTN/GRIK2/ARC/REEP2/GRIK5/KIF5A/CD24/CACNG4/CACNG2	44
BP	GO:0045665	negative regulation of neuron differentiation	63/3084	188/11512	0.0237392	SEMA3B/APOE/SLIT2/NLGN3/THRB/NR2F1/REST/SEMA6A/LRP4/ID2/SPART/MEIS1/CERS2/GLI3/CIB1/RYK/PBX1/RAB29/RAPGEF2/FOXO3/MAP4K4/GDF11/PAQR3/CBFA2T2/GDI1/SEMA5A/RUFY3/YWHAH/SEMA3G/PLXNA3/SEMA4F/NOTCH3/HEY1/CDK5R1/ASPM/TRPC6/SEMA6C/THY1/SEMA6D/INPP5F/DAB1/RAP1GAP2/NLGN1/INPP5J/ITM2C/PTPRO/DPYSL3/CRMP1/ASCL1/MAP2/TLX2/TRIM46/KIAA0319/ZNF365/TNR/PHOX2B/EFNB3/DLX2/BMP7/ISL1/STMN2/RIT2/SIX3	63
BP	GO:0045834	positive regulation of lipid metabolic process	43/3084	122/11512	0.0240011	STAR/APOC1/AVPR1A/RGN/APOE/MLXIPL/SCARB1/IRS1/LDLR/PDGFRA/AGTR1/PRKCD/POR/LDLRAP1/SREBF1/CREBL2/NR1H3/ELOVL5/ABCD1/CPT1A/PRKD1/TNFRSF1A/MLYCD/SRC/PPARA/CAPN2/AMBRA1/PNPLA2/LPGAT1/AKT2/CD81/DGKZ/FGF2/LYN/ADM/GPLD1/EEF1A2/PRKCE/SMPD3/AGAP2/FGF1/INS/ADORA1	43
BP	GO:0046460	neutral lipid biosynthetic process	11/3084	23/11512	0.0246771	RGN/C3/SCARB1/LDLR/SREBF1/NR1H3/DGAT1/GK/FBXW7/LPIN1/GPLD1	11
BP	GO:0046463	acylglycerol biosynthetic process	11/3084	23/11512	0.0246771	RGN/C3/SCARB1/LDLR/SREBF1/NR1H3/DGAT1/GK/FBXW7/LPIN1/GPLD1	11
BP	GO:0035637	multicellular organismal signaling	58/3084	172/11512	0.0256809	AVPR1A/KCNQ1/GJA1/KCNN2/ITGA2/KCNK3/ATP1B3/ITPR3/ASPH/FGF12/KCNJ5/KCNMB4/CACNA1H/DMPK/AHCYL1/STIM1/ATP1A1/CACNB2/ATP2B1/NFASC/CACNA2D1/CNTNAP1/ANK2/TRPC1/CACNB1/KCNK15/ATP1B1/SCN8A/FKBP1B/GJC1/PDE4D/KCNJ12/SLC8A1/PKP2/KCND1/KCNMB2/CACNA1C/CACNB3/CACNA2D2/SPTBN4/SCN2B/HCN4/GRIK2/CACNA2D3/KCNH2/CARTPT/SCN3B/CHRNB4/SCN2A/TNR/SCN9A/SLC8A2/RYR2/ATP1A3/SCN3A/CACNG4/CACNG2/CNTNAP2	58
BP	GO:0006743	ubiquinone metabolic process	8/3084	15/11512	0.0260676	FDXR/COQ8A/COQ2/HMGCR/PDSS2/UBIAD1/COQ9/COQ6	8
BP	GO:0009084	glutamine family amino acid biosynthetic process	8/3084	15/11512	0.0260676	ASS1/SLC1A3/GLS/GLUD1/SLC25A12/ASL/PYCR1/GLS2	8
BP	GO:0032354	response to follicle-stimulating hormone	8/3084	15/11512	0.0260676	STAR/TGFBR3/POR/HMGCS1/GCLM/ASNS/SRD5A1/EFNA5	8
BP	GO:0032366	intracellular sterol transport	8/3084	15/11512	0.0260676	STAR/LDLR/ABCA1/LDLRAP1/NPC1/OSBP/SCP2/ABCA2	8
BP	GO:0032367	intracellular cholesterol transport	8/3084	15/11512	0.0260676	STAR/LDLR/ABCA1/LDLRAP1/NPC1/OSBP/SCP2/ABCA2	8
BP	GO:0016358	dendrite development	66/3084	199/11512	0.026323	APOE/NLGN3/CAMK1/PRKG1/FARP1/LRP4/KALRN/LLPH/MEF2C/DLG5/ITSN1/SRGAP2/DNM1L/ABI2/RAPGEF2/KIDINS220/CPEB3/MAP1S/RBFOX2/BHLHB9/SLC9A6/SLC12A5/LZTS3/CAMK1D/CRTC1/ARHGAP33/DLG4/MARK1/YWHAH/LRP8/MAPK8IP2/BAIAP2/FYN/CELSR2/SDC2/ARHGAP44/CDK5R1/TRPC6/MAP1B/PHACTR1/NSMF/LZTS1/DBN1/DAB1/GRIP1/ADGRB3/NLGN1/CTNNA2/TIAM1/PTN/MAP1A/ALK/ARC/MAP2/TLX2/PAK3/DCLK1/KIAA0319/NEURL1/ZNF365/FLRT1/CTNND2/BMP7/CHRNA3/CA…	66
BP	GO:0051968	positive regulation of synaptic transmission, glutamatergic	12/3084	26/11512	0.0263458	NLGN3/EGFR/CCL2/STXBP1/NLGN1/OXTR/NRXN1/TNR/CACNG4/NTRK1/CACNG2/ADCYAP1	12
BP	GO:0097484	dendrite extension	12/3084	26/11512	0.0263458	CXCR4/RIMS2/SMURF1/LLPH/SLC9A6/AUTS2/WASF1/SYT17/UNC13A/SYT1/RIMS1/SYT2	12
BP	GO:0015837	amine transport	31/3084	84/11512	0.0266428	AVPR1A/SNCG/SYT12/RGS2/PINK1/PER2/STK39/SNCA/ABAT/STXBP1/SV2A/SYT17/OXTR/STX1A/CARTPT/RGS4/TH/SYT11/SLC18A1/CHGA/SYT1/KCNB1/CHRNA3/DDC/CHRNB2/SYT5/ADORA1/SLC18A2/DRD2/SYT2/OPRK1	31
BP	GO:0060996	dendritic spine development	31/3084	84/11512	0.0266428	APOE/NLGN3/CAMK1/KALRN/LLPH/MEF2C/DLG5/ITSN1/SRGAP2/DNM1L/ABI2/CPEB3/BHLHB9/SLC9A6/SLC12A5/LZTS3/ARHGAP33/DLG4/LRP8/BAIAP2/ARHGAP44/CDK5R1/DBN1/NLGN1/TIAM1/ARC/PAK3/NEURL1/ZNF365/CTNND2/CAMK2B	31
BP	GO:0099175	regulation of postsynapse organization	30/3084	81/11512	0.0274734	APOE/NLGN3/LRP4/KALRN/CDH2/DNM1L/ABI2/BHLHB9/PRNP/LZTS3/ARHGAP33/LRP8/BAIAP2/FYN/ARHGAP44/CDK5R1/ARHGAP22/DBN1/NLGN1/TIAM1/NRXN1/PTN/DGKB/ARC/PAK3/GAP43/CAMK2B/INS/LRRTM2/CBLN1	30
BP	GO:0002087	regulation of respiratory gaseous exchange by neurological system process	6/3084	10/11512	0.0276	NLGN3/GLS/PBX3/NLGN1/PHOX2B/ADORA1	6
BP	GO:0003207	cardiac chamber formation	6/3084	10/11512	0.0276	MEF2C/SOX4/TBX2/HAND1/HAND2/SOX11	6
BP	GO:0030208	dermatan sulfate biosynthetic process	6/3084	10/11512	0.0276	DCN/UST/VCAN/DSE/CSPG4/CSPG5	6
BP	GO:0090331	negative regulation of platelet aggregation	6/3084	10/11512	0.0276	PRKCD/PRKG1/C1QTNF1/CEACAM1/ABAT/SERPINE2	6
BP	GO:1990535	neuron projection maintenance	6/3084	10/11512	0.0276	ABCD1/DCTN1/PRNP/MAP1A/ATP1A3/INS	6
BP	GO:0010977	negative regulation of neuron projection development	46/3084	133/11512	0.02816	SEMA3B/APOE/SLIT2/NLGN3/NR2F1/SEMA6A/LRP4/SPART/CERS2/CIB1/RYK/RAB29/RAPGEF2/MAP4K4/PAQR3/CBFA2T2/GDI1/SEMA5A/RUFY3/YWHAH/SEMA3G/PLXNA3/SEMA4F/CDK5R1/TRPC6/SEMA6C/THY1/SEMA6D/INPP5F/DAB1/RAP1GAP2/NLGN1/INPP5J/ITM2C/PTPRO/DPYSL3/CRMP1/MAP2/TLX2/TRIM46/KIAA0319/ZNF365/TNR/EFNB3/STMN2/RIT2	46
BP	GO:0060997	dendritic spine morphogenesis	20/3084	50/11512	0.0286954	NLGN3/KALRN/DNM1L/ABI2/BHLHB9/LZTS3/ARHGAP33/DLG4/LRP8/BAIAP2/ARHGAP44/CDK5R1/DBN1/NLGN1/TIAM1/ARC/PAK3/ZNF365/CTNND2/CAMK2B	20
BP	GO:0008089	anterograde axonal transport	15/3084	35/11512	0.0289161	KIF1C/AP3M2/KIF5C/MAPK8IP3/KIF3A/FEZ1/KIF4A/AP3B2/MAP1A/MAP2/TRIM46/NEFL/KIF5A/KIF1A/RAB27B	15
BP	GO:0042417	dopamine metabolic process	15/3084	35/11512	0.0289161	MAOB/MAOA/ITGAM/COMT/ATP7A/SNCA/ABAT/GCH1/SNCB/GRIN2A/TH/DBH/DDC/CHRNB2/DRD2	15
BP	GO:0045823	positive regulation of heart contraction	15/3084	35/11512	0.0289161	AVPR1A/KCNQ1/RGS2/TPM1/ATP1A1/HEY2/ADM/NOS1AP/PDE4D/SLC1A1/GCH1/RGS4/SCN3B/CHGA/RYR2	15
BP	GO:0043113	receptor clustering	19/3084	47/11512	0.0290046	APOE/LRP4/RER1/DNAJA3/ETV5/CDH2/CD81/DLG3/MAGI2/DLG4/GLRB/AGRN/NRXN2/THY1/NLGN1/NRXN1/PTN/GRIK2/GRIK5	19
BP	GO:0044273	sulfur compound catabolic process	19/3084	47/11512	0.0290046	TST/DCN/CTH/MPST/LUM/OGN/VCAN/ACAT1/HYAL1/ABCD1/GNS/TXN2/MLYCD/PCYOX1L/CHAC1/CSPG4/ACOT7/IDS/CSPG5	19
BP	GO:0086002	cardiac muscle cell action potential involved in contraction	19/3084	47/11512	0.0290046	KCNQ1/GJA1/KCNN2/FGF12/KCNJ5/GPD1L/SNTA1/ATP1A1/CACNB2/CACNA2D1/ANK2/NOS1AP/GJC1/PKP2/CACNA1C/SCN2B/KCNH2/SCN3B/RYR2	19
BP	GO:0060043	regulation of cardiac muscle cell proliferation	16/3084	38/11512	0.0291999	GATA6/GJA1/TGFBR3/FGF9/FGFR2/YAP1/MEIS1/MEF2C/TGFBR2/TGFBR1/FGF2/HEY2/CDK1/MAPK11/FGFR1/TBX2	16
BP	GO:0006636	unsaturated fatty acid biosynthetic process	18/3084	44/11512	0.0292096	AVPR1A/SCD5/FADS2/PTGDS/ALOX5AP/FADS3/ELOVL6/ELOVL5/ABCD1/SCD/SIRT1/DECR2/CBR1/DEGS1/FABP5/PTGES/PTGS1/ELOVL4	18
BP	GO:0030837	negative regulation of actin filament polymerization	18/3084	44/11512	0.0292096	SLIT2/RDX/PRKCD/HIP1R/LMOD1/CARMIL1/TMSB4X/SPTBN1/ADD3/PFN2/VILL/SPTBN5/TMOD1/DMTN/TMOD2/SPTBN4/SPTB/ADD2	18
BP	GO:0050994	regulation of lipid catabolic process	18/3084	44/11512	0.0292096	APOC1/SCARB1/RARRES2/IRS1/IDH1/LDLR/PRKCD/ABCD1/CPT1A/MLYCD/PPARA/PNPLA2/AKT2/PDE3B/GPLD1/PRKCE/INS/ADORA1	18
BP	GO:0060078	regulation of postsynaptic membrane potential	41/3084	117/11512	0.029709	NLGN3/CHRNB1/EIF4A3/RIMS2/MEF2C/SH3GL1/GABBR1/DLG4/GLRB/MAPK8IP2/BAIAP2/SNCA/DGKI/ABAT/NLGN4X/P2RX6/CACNB3/NLGN1/GABRB3/GABRD/IGSF9B/NRXN1/GRIK3/GRIK2/STX1A/GRIN2A/RGS4/FGF14/GABRG2/MPP2/CHRNB4/CHRNA5/RIMS1/GRIK5/CHRNA3/CHRNB2/ADORA1/DRD2/CBLN1/OPRM1/ADCYAP1	41
BP	GO:0001956	positive regulation of neurotransmitter secretion	9/3084	18/11512	0.0299421	DNM1L/CACNB2/SNCA/STXBP1/NLGN1/BAIAP3/STX1A/UNC13A/SYT1	9
BP	GO:0098659	inorganic cation import across plasma membrane	26/3084	69/11512	0.0308716	ATP1B3/SLC12A2/KCNJ5/HFE/SLC30A1/SLC39A14/SLC12A4/ATP1A1/SLC9A6/SLC12A5/PRNP/SLC9A7/SLC31A1/CACNA2D1/SLC39A6/FAM155B/FYN/SLC9A5/ATP1B1/KCNJ12/SLC8A1/HCN4/KCNH2/FAM155A/ATP1A3/KCNJ6	26
BP	GO:0099587	inorganic ion import across plasma membrane	26/3084	69/11512	0.0308716	ATP1B3/SLC12A2/KCNJ5/HFE/SLC30A1/SLC39A14/SLC12A4/ATP1A1/SLC9A6/SLC12A5/PRNP/SLC9A7/SLC31A1/CACNA2D1/SLC39A6/FAM155B/FYN/SLC9A5/ATP1B1/KCNJ12/SLC8A1/HCN4/KCNH2/FAM155A/ATP1A3/KCNJ6	26
BP	GO:0046890	regulation of lipid biosynthetic process	53/3084	157/11512	0.031168	STAR/APOC1/AVPR1A/RGN/APOE/MLXIPL/C3/SCARB1/VDR/IDH1/LDLR/TM7SF2/PRKCD/DHCR7/PDK4/POR/SCAP/REST/ACADVL/SREBF1/CLCN2/FDPS/CREBL2/ELOVL6/ADIPOR2/CYP27B1/NR1H3/ELOVL5/ABCD1/SCD/HMGCR/SIRT1/HMGCS1/TNFRSF1A/TSPO/CEACAM1/IDI1/FDFT1/CAPN2/MVD/SQLE/LPGAT1/NFKB1/FBXW7/ATP1A1/ADM/DKK3/GPLD1/FABP5/SMPD3/AGAP2/FGF1/INS	53
BP	GO:0033555	multicellular organismal response to stress	25/3084	66/11512	0.0317214	APOE/GJA1/TSPO/COMT/CAPN2/MEF2C/EIF4G1/MAPK8IP2/BCL2/GCH1/BRINP1/ASIC1/LYPD1/GRIK2/ADCYAP1R1/IDO1/RET/SCN9A/CACNA1B/DBH/ASIC4/NTRK1/SLC6A2/PENK/ADCYAP1	25
BP	GO:0030203	glycosaminoglycan metabolic process	46/3084	134/11512	0.0320339	DCN/LYVE1/GPC4/B4GALT5/ST3GAL4/SDC3/SDC1/LUM/OGN/UST/ST3GAL1/VCAN/SDC4/SLC35D1/HYAL1/B4GALT1/HS6ST1/UGDH/GNS/HPSE/SGSH/DSE/EXT1/CHSY1/NFKB1/ABCC5/B3GNT2/SLC35D2/FGF2/CHPF/B4GAT1/ITIH5/SDC2/AGRN/CD44/CSPG4/CHST7/IDS/CSPG5/SPOCK2/HS3ST2/SMPD3/SPOCK3/CHST1/B3GNT4/B3GAT1	46
BP	GO:0034110	regulation of homotypic cell-cell adhesion	10/3084	21/11512	0.0327695	RDX/PRKCD/PRKG1/C1QTNF1/CEACAM1/PRKCA/DMTN/LYN/ABAT/SERPINE2	10
BP	GO:0060384	innervation	10/3084	21/11512	0.0327695	VCAM1/ADARB1/LRIG1/SULF1/SERPINE2/GABRB3/UNC13A/RET/ISL1/NTRK1	10
BP	GO:0032412	regulation of ion transmembrane transporter activity	63/3084	191/11512	0.03287	RGN/NLGN3/PPIF/ABCB1/SLC9A3R1/ATP1B3/FGF12/TESC/CCL2/PLCG2/GPD1L/GLRX/HSPA2/NIPSNAP2/PINK1/ACTN4/AHCYL1/MEF2C/TMSB4X/WWP2/STIM1/FHL1/VAMP2/ATP7A/DLG3/CACNB2/PRNP/MYO5A/DLG4/CACNA2D1/YWHAH/STK39/ANK2/GNB5/MAPK8IP2/KCNAB1/CACNB1/ATP1B1/PRKCE/TRPC6/FKBP1B/NOS1AP/PDE4D/AKAP6/STAC/CACNB3/NLGN1/HPCA/SCN2B/GRIN2A/SCN3B/ARC/FGF14/KCNC1/GRIA2/GRIA4/MMP9/NEFL/RYR2/CACNG4/DRD2/CACNG2/OPRM1	63
BP	GO:0051963	regulation of synapse assembly	28/3084	76/11512	0.0346892	NLGN3/GPC4/SRPX2/MEF2C/DLG5/EIF4G1/BHLHB9/CLSTN1/SNCA/AGRN/NECTIN1/ADGRL1/SYNDIG1/CLSTN3/CLSTN2/FLRT3/EFNA5/ADGRB3/NLGN1/OXTR/NRXN1/ADGRB2/GAP43/FLRT1/CHRNB2/LRRTM2/NTRK1/CBLN1	28
BP	GO:0006700	C21-steroid hormone biosynthetic process	11/3084	24/11512	0.0347731	STAR/CYP11A1/FDX1/FDXR/AKR1B1/REST/CLCN2/CACNA1H/TSPO/ADM/DKK3	11
BP	GO:0010460	positive regulation of heart rate	11/3084	24/11512	0.0347731	AVPR1A/KCNQ1/TPM1/HEY2/ADM/PDE4D/SLC1A1/GCH1/RGS4/SCN3B/RYR2	11
BP	GO:0050974	detection of mechanical stimulus involved in sensory perception	11/3084	24/11512	0.0347731	ADGRV1/ITGA2/CXCR4/WHRN/FYN/SERPINE2/PIEZO2/CACNB3/PHF24/PDZD7/NTRK1	11
BP	GO:0060045	positive regulation of cardiac muscle cell proliferation	11/3084	24/11512	0.0347731	GATA6/TGFBR3/FGF9/FGFR2/YAP1/MEF2C/FGF2/HEY2/CDK1/FGFR1/TBX2	11
BP	GO:0001578	microtubule bundle formation	21/3084	54/11512	0.0349321	IQCG/MARK4/GAS8/MAP1S/PLK1/SPAG1/PRC1/DNAAF1/KIF20A/PSRC1/LRRC49/MAP1B/CFAP46/TPPP3/TPPP/ZMYND10/MAP2/TRIM46/NEURL1/MTCL1/DCX	21
BP	GO:0055021	regulation of cardiac muscle tissue growth	21/3084	54/11512	0.0349321	GATA6/GJA1/TGFBR3/FGF9/FGFR2/YAP1/RGS2/MEIS1/PPARA/MEF2C/TGFBR2/TGFBR1/PAK1/FGF2/HEY2/CDK1/MAPK11/FGFR1/TBX2/AKAP6/RGS4	21
BP	GO:0021692	cerebellar Purkinje cell layer morphogenesis	7/3084	13/11512	0.0349579	RORA/WHRN/ATP7A/LDB1/AGTPBP1/FAIM2/CEND1	7
BP	GO:0033605	positive regulation of catecholamine secretion	7/3084	13/11512	0.0349579	PINK1/OXTR/STX1A/CARTPT/KCNB1/CHRNB2/OPRK1	7
BP	GO:0055089	fatty acid homeostasis	7/3084	13/11512	0.0349579	APOE/MLXIPL/DGAT1/ABCD1/SIRT1/INS/ADORA1	7
BP	GO:0060080	inhibitory postsynaptic potential	7/3084	13/11512	0.0349579	NLGN3/RIMS2/ABAT/GABRB3/IGSF9B/GRIK2/RIMS1	7
BP	GO:0090208	positive regulation of triglyceride metabolic process	7/3084	13/11512	0.0349579	RGN/SCARB1/LDLR/SREBF1/NR1H3/PNPLA2/GPLD1	7
BP	GO:1900242	regulation of synaptic vesicle endocytosis	7/3084	13/11512	0.0349579	SLC2A4/SH3GL1/DNM1L/VAMP4/NLGN1/DNM1/SYT11	7
BP	GO:0009261	ribonucleotide catabolic process	12/3084	27/11512	0.0361332	ACAT1/ABCD1/NUDT4/MLYCD/PDE8A/NT5E/ENTPD4/PDE8B/NUDT11/PDE10A/ACOT7/PDE4D	12
BP	GO:0036314	response to sterol	12/3084	27/11512	0.0361332	ABCA1/GRAMD1B/RORA/SMO/HMGCS1/TGFBR2/TGFBR1/OSBPL7/LRP8/ABCA2/GPLD1/RORC	12
BP	GO:1903307	positive regulation of regulated secretory pathway	18/3084	45/11512	0.0368144	CACNA1H/ITGAM/STX4/DNM1L/CACNB2/RAB3A/RAB3D/GAB2/STXBP1/DOC2B/SCAMP5/NLGN1/GATA2/STX1A/RAB15/SYT1/KCNB1/CDK5R2	18
BP	GO:0051693	actin filament capping	13/3084	30/11512	0.0369903	RDX/LMOD1/CARMIL1/SPTBN1/ADD3/VILL/SPTBN5/TMOD1/DMTN/TMOD2/SPTBN4/SPTB/ADD2	13
BP	GO:0007528	neuromuscular junction development	17/3084	42/11512	0.0372421	PDZRN3/LRP4/LAMB2/KALRN/RER1/DNAJA3/ETV5/DCTN1/CACNB2/COL4A1/AGRN/CACNB1/CACNB3/CACNA2D2/PTN/UNC13A/CACNG2	17
BP	GO:0097120	receptor localization to synapse	17/3084	42/11512	0.0372421	GPC4/KIF17/IQSEC2/CEP112/DLG3/CLSTN1/KIF5C/DLG4/GRIP2/ARHGAP44/DBN1/GRIP1/NLGN1/SNAP25/KIF5A/CACNG4/CACNG2	17
BP	GO:0030204	chondroitin sulfate metabolic process	14/3084	33/11512	0.0374537	DCN/VCAN/SLC35D1/HYAL1/UGDH/DSE/CHSY1/CHPF/CSPG4/CHST7/IDS/CSPG5/SPOCK2/SPOCK3	14
BP	GO:0050769	positive regulation of neurogenesis	123/3084	399/11512	0.0376078	STAR/APOE/SLIT2/CAMK1/CXCR4/REST/BMP4/ZEB2/HIF1A/SEMA6A/CSF1/RGS2/ID2/SMO/PRKD1/MAN2A1/TSPO/KALRN/GLI3/RIMS2/SMURF1/LLPH/MEF2C/BCL6/DLG5/EIF4G1/CFLAR/ITSN1/ETV5/ATF1/DNM1L/TCF4/RAPGEF2/KIDINS220/FZD3/CPEB3/GRN/APBB1/BHLHB9/DNMT3B/PAK1/RARA/TENM3/MAGI2/XRCC2/ZEB1/LIMK1/METRN/CBFA2T2/CAMK1D/GDI1/CRTC1/DLG4/PPP2R5B/SEMA5A/RUFY3/LYN/LRP8/PLXNA3/NAP1L2/BAIAP2/FN1/RND2/FYN/MMD/FEZ1/ITGA6/FGFR1/BCL2/ASP…	123
BP	GO:0007019	microtubule depolymerization	15/3084	36/11512	0.0376084	CIB1/CKAP2/MAP1S/KIF2A/TTBK2/CLASP2/KIF2C/STMN3/MAP1B/STMN1/KIF18B/APC2/MAP1A/STMN4/STMN2	15
BP	GO:0050654	chondroitin sulfate proteoglycan metabolic process	15/3084	36/11512	0.0376084	DCN/VCAN/SLC35D1/HYAL1/UGDH/DSE/CHSY1/CHPF/CSPG4/CHST7/IDS/CSPG5/SPOCK2/SPOCK3/B3GAT1	15
BP	GO:0061337	cardiac conduction	41/3084	119/11512	0.0388719	KCNQ1/GJA1/KCNN2/KCNK3/ATP1B3/ITPR3/ASPH/KCNJ5/DMPK/AHCYL1/STIM1/ATP1A1/CACNB2/ATP2B1/CACNA2D1/ANK2/TRPC1/CACNB1/KCNK15/ATP1B1/FKBP1B/GJC1/PDE4D/KCNJ12/SLC8A1/PKP2/KCND1/CACNA1C/CACNB3/CACNA2D2/SPTBN4/SCN2B/HCN4/CACNA2D3/KCNH2/SCN3B/SLC8A2/RYR2/ATP1A3/CACNG4/CACNG2	41
BP	GO:0010769	regulation of cell morphogenesis involved in differentiation	83/3084	261/11512	0.0393522	SEMA3B/APOE/SLIT2/NLGN3/FBLN1/UST/CARMIL1/ZEB2/SEMA6A/LRP4/SPART/RREB1/KALRN/CIB1/ACTN4/RYK/CTTN/C1QBP/CDH2/DNM1L/ABI2/RAPGEF2/BHLHB9/PAK1/LIMK1/LZTS3/METRN/GDI1/ARHGAP33/SEMA5A/RUFY3/DMTN/YWHAH/SEMA3G/LRP8/RAC3/PLXNA3/BAIAP2/FN1/SEMA4F/RND2/SDC2/ARHGAP44/CDK5R1/OLFM1/TRPC6/MAP1B/PLXNC1/SEMA6C/NSMF/THY1/LZTS1/DBN1/SEMA6D/BRSK2/PLXNA2/CSPG5/DAB1/EFNA5/PLXNB1/ADGRB3/XK/NLGN1/PTPRO/TIAM1/ARC/MAP2/TL…	83
BP	GO:0006631	fatty acid metabolic process	92/3084	292/11512	0.0393986	APOC1/AVPR1A/ACSF2/RGN/MLXIPL/C3/IRS1/ALDH3A2/SCD5/FADS2/PTGDS/PDK4/PRKAR2B/POR/HIBCH/ACADS/SCAP/PCCB/PCCA/ALOX5AP/ACADM/ACADVL/BDH2/MSMO1/SREBF1/HADHB/ACAT1/LIPE/FADS3/ETFDH/ELOVL6/ADIPOR2/DECR1/ECH1/NR1H3/ELOVL5/ETFA/CPT2/PHYH/ACAT2/ABCD1/CREM/PON2/SCD/PDK1/CPT1A/ECHDC2/EPHX2/SIRT1/TNFRSF1A/DECR2/PDP1/ECI2/MLYCD/CEACAM1/PPARA/ACAA1/HSD17B4/QKI/AUH/DLD/GPX1/OXSM/CES2/PRKAB1/LYPLA1/GSTZ1/AMACR/CB…	92
BP	GO:0009312	oligosaccharide biosynthetic process	8/3084	16/11512	0.0401277	FBP1/ST3GAL4/B4GALT1/MPDU1/FUT8/B3GALT2/B3GALT1/B3GALT5	8
BP	GO:0032793	positive regulation of CREB transcription factor activity	8/3084	16/11512	0.0401277	PRKD1/CAMK1D/CRTC1/RPS6KA5/LRP8/ADCY1/OPRD1/CD200	8
BP	GO:0042447	hormone catabolic process	8/3084	16/11512	0.0401277	DIO2/IDE/HSD17B11/ACAA1/YWHAH/SRD5A1/ACHE/ACE	8
BP	GO:1903861	positive regulation of dendrite extension	8/3084	16/11512	0.0401277	CXCR4/RIMS2/SMURF1/SYT17/UNC13A/SYT1/RIMS1/SYT2	8
BP	GO:0030258	lipid modification	63/3084	193/11512	0.040347	APOC1/APOE/SOAT1/IRS1/ALDH3A2/ABO/AGTR1/PDK4/ST3GAL4/POR/HIBCH/ACADS/ACADM/ACADVL/BDH2/HADHB/ACAT1/APOD/ETFDH/ADIPOR2/DECR1/ECH1/ETFA/CPT2/PHYH/ACAT2/ABCD1/IMPA2/CPT1A/ECHDC2/EPHX2/MTM1/PIK3CA/DECR2/ECI2/MLYCD/PPARA/ACAA1/CISH/HSD17B4/AUH/DGKA/AMACR/INPP1/MCAT/AKT2/SCP2/PIP4K2C/MTMR9/PIK3R1/DGKZ/SYNJ1/DGKH/DGKI/DGKE/MTMR7/INPP5F/EFR3B/INPP5J/PLPPR4/B3GALT1/DGKB/B4GALNT1	63
BP	GO:0015918	sterol transport	28/3084	77/11512	0.0409691	STAR/APOC1/APOE/SCARB1/SOAT1/LDLR/ABCA1/ABCB4/GRAMD1B/PLTP/LDLRAP1/NPC1/NR1H3/NFKBIA/OSBP/SIRT1/TSPO/OSBP2/OSBPL1A/OSBPL11/APOM/SCP2/NFKB1/OSBPL7/ABCA7/ABCA2/OSBPL3/ABCG4	28
BP	GO:0030148	sphingolipid biosynthetic process	27/3084	74/11512	0.0423939	ST8SIA5/ALDH3A2/ALDH3B1/PRKCD/B4GALT5/SPTSSA/ST3GAL5/PRKD3/UGCG/ELOVL6/ELOVL5/PRKD1/TNFRSF1A/CERS2/SGMS1/VAPA/SPTLC2/CERS4/DEGS1/SGPL1/B3GALT2/ELOVL4/SMPD3/B3GALT1/B4GALNT1/ST8SIA2/ST8SIA3	27
BP	GO:0034765	regulation of ion transmembrane transport	111/3084	359/11512	0.0428575	RGN/KCNQ1/GJA1/KCNN2/NLGN3/PPIF/ABCB1/SLC9A3R1/ATP1B3/FGF12/KCNJ5/TESC/CCL2/CLCN2/PLCG2/GPD1L/GLRX/CACNA1H/RGS2/HSPA2/NIPSNAP2/PINK1/SLC30A1/ACTN4/AHCYL1/MEF2C/TMSB4X/TCIRG1/WWP2/AKT2/STIM1/FHL1/VAMP2/SNTA1/ATP7A/DLG3/CACNB2/PRNP/MYO5A/KCNAB2/DLG4/CACNA2D1/LYN/YWHAH/PER2/STK39/ANK2/GNB5/KCNC4/MAPK8IP2/KCNAB1/TRPC1/SNCA/FYN/CACNB1/KCNK15/ATP1B1/PRKCE/TRPC6/SCN8A/FKBP1B/NOS1AP/PDE4D/KCNK7/KCNJ12/KC…	111
BP	GO:0036315	cellular response to sterol	9/3084	19/11512	0.0436676	ABCA1/GRAMD1B/RORA/SMO/HMGCS1/OSBPL7/LRP8/GPLD1/RORC	9
BP	GO:0099560	synaptic membrane adhesion	9/3084	19/11512	0.0436676	GPC4/PTPRF/PCDH17/FLRT3/EFNA5/NLGN1/IGSF9B/NRXN1/NTNG1	9
BP	GO:1903421	regulation of synaptic vesicle recycling	9/3084	19/11512	0.0436676	SLC2A4/SH3GL1/DNM1L/VAMP4/SNCA/NLGN1/DNM1/FGF14/SYT11	9
BP	GO:0097061	dendritic spine organization	25/3084	68/11512	0.0453423	APOE/NLGN3/KALRN/CTTN/DNM1L/ABI2/BHLHB9/PRNP/LZTS3/ARHGAP33/DLG4/LRP8/BAIAP2/FYN/ARHGAP44/CDK5R1/DBN1/NLGN1/TIAM1/ARC/PAK3/ZNF365/CTNND2/CAMK2B/INS	25
BP	GO:0050433	regulation of catecholamine secretion	18/3084	46/11512	0.0457686	SNCG/SYT12/PINK1/SNCA/ABAT/SYT17/OXTR/STX1A/CARTPT/SYT11/CHGA/SYT1/KCNB1/CHRNB2/SYT5/DRD2/SYT2/OPRK1	18
BP	GO:0030206	chondroitin sulfate biosynthetic process	10/3084	22/11512	0.0460049	DCN/VCAN/SLC35D1/UGDH/DSE/CHSY1/CHPF/CSPG4/CHST7/CSPG5	10
BP	GO:0032373	positive regulation of sterol transport	10/3084	22/11512	0.0460049	APOE/ABCA1/ABCB4/PLTP/LDLRAP1/NR1H3/NFKBIA/SIRT1/SCP2/ABCA7	10
BP	GO:0032376	positive regulation of cholesterol transport	10/3084	22/11512	0.0460049	APOE/ABCA1/ABCB4/PLTP/LDLRAP1/NR1H3/NFKBIA/SIRT1/SCP2/ABCA7	10
BP	GO:0034377	plasma lipoprotein particle assembly	10/3084	22/11512	0.0460049	APOC1/APOE/SOAT1/ABCA1/BMP1/DGAT1/P4HB/APOM/ABCA7/PRKACB	10
BP	GO:2000463	positive regulation of excitatory postsynaptic potential	10/3084	22/11512	0.0460049	NLGN3/RIMS2/DLG4/BAIAP2/CACNB3/NLGN1/NRXN1/STX1A/RGS4/RIMS1	10
BP	GO:0006103	2-oxoglutarate metabolic process	6/3084	11/11512	0.0471657	IDH1/PHYH/DLD/DLST/KYAT3/IDH2	6
BP	GO:0030205	dermatan sulfate metabolic process	6/3084	11/11512	0.0471657	DCN/UST/VCAN/DSE/CSPG4/CSPG5	6
BP	GO:0036109	alpha-linolenic acid metabolic process	6/3084	11/11512	0.0471657	FADS2/ELOVL5/ABCD1/ACAA1/HSD17B4/SCP2	6
BP	GO:0061577	calcium ion transmembrane transport via high voltage-gated calcium channel	6/3084	11/11512	0.0471657	CACNB2/CACNA2D1/CACNB1/NOS1AP/CACNA1C/CACNB3	6
BP	GO:0070166	enamel mineralization	6/3084	11/11512	0.0471657	FOXO1/PPARA/TCIRG1/STIM1/CNNM4/NECTIN1	6
BP	GO:0010721	negative regulation of cell development	87/3084	277/11512	0.0473212	SEMA3B/APOE/SLIT2/NLGN3/LDLR/FBLN1/THRB/DAAM2/NR2F1/REST/SEMA6A/LRP4/RGS2/ID2/CTNNA1/SPART/TSPO/MEIS1/CERS2/PPARA/GLI3/CIB1/ACTN4/RYK/PBX1/RAB29/SRGAP2/RAPGEF2/FOXO3/FBXW7/MAP4K4/GDF11/PAQR3/PAK1/IDH2/CBFA2T2/GDI1/SEMA5A/RUFY3/DMTN/YWHAH/SEMA3G/PLXNA3/SEMA4F/NOTCH3/HEY1/FRZB/CDK5R1/BCL2/ASPM/TRPC6/SEMA6C/THY1/SEMA6D/INPP5F/GPR173/DAB1/RAP1GAP2/EFNA5/NLGN1/INPP5J/ITM2C/PTPRO/BRINP1/DPYSL3/NRG1/CRM…	87
BP	GO:0072523	purine-containing compound catabolic process	16/3084	40/11512	0.0474257	AOX1/ACAT1/ABCD1/NUDT4/MLYCD/GPX1/DNPH1/SAMHD1/PDE8A/ENPP4/NT5E/PDE8B/NUDT11/PDE10A/ACOT7/PDE4D	16
BP	GO:0018146	keratan sulfate biosynthetic process	11/3084	25/11512	0.047451	B4GALT5/ST3GAL4/LUM/OGN/ST3GAL1/B4GALT1/B3GNT2/SLC35D2/B4GAT1/CHST1/B3GNT4	11
BP	GO:0050650	chondroitin sulfate proteoglycan biosynthetic process	11/3084	25/11512	0.047451	DCN/VCAN/SLC35D1/UGDH/DSE/CHSY1/CHPF/CSPG4/CHST7/CSPG5/B3GAT1	11
BP	GO:0090207	regulation of triglyceride metabolic process	11/3084	25/11512	0.047451	RGN/APOE/C3/SCARB1/LDLR/SREBF1/NR1H3/PNPLA2/FBXW7/GPLD1/GNB3	11
BP	GO:0099068	postsynapse assembly	11/3084	25/11512	0.047451	NLGN3/LRP4/CDH2/MAGI2/NRXN2/NLGN4X/NLGN1/NRXN1/GAP43/LRRTM2/CBLN1	11
BP	GO:1902668	negative regulation of axon guidance	11/3084	25/11512	0.047451	SEMA3B/SLIT2/SEMA6A/RYK/SEMA5A/SEMA3G/PLXNA3/SEMA4F/SEMA6C/SEMA6D/PTPRO	11
BP	GO:0060627	regulation of vesicle-mediated transport	132/3084	434/11512	0.0474728	APOC1/APOE/C3/SCARB1/DAB2/VTN/RDX/RAB20/ITGA2/SYT12/MERTK/EZR/SDC1/LDLRAP1/RAB31/RAB9A/TBC1D4/HIP1R/PACSIN2/PACSIN3/REST/SDC4/CCL2/SLC2A4/HFE/PLCG2/SLC11A1/NR1H3/CACNA1H/GAS1/STXBP2/PRKD1/AXL/ITGAM/CD14/CEACAM1/SRC/EHD1/PINK1/STX4/RIMS2/ACTN4/SH3GL1/RAB29/ITSN1/LYPLA1/RAPGEF4/SIRPA/AKT2/GAS6/DNM1L/RUFY2/PREPL/GIT1/VAMP2/AHI1/NSF/PFN2/ATP6AP1/CACNB2/DNAJC6/VAMP4/MAGI2/EHD4/CLASP2/TNK2/CAMK1D/DLG4/…	132
BP	GO:0015872	dopamine transport	15/3084	37/11512	0.0480283	SNCG/SYT12/PINK1/SNCA/ABAT/SYT17/SYT11/SYT1/CHRNB2/SYT5/SLC18A2/DRD2/SLC6A2/SYT2/OPRK1	15
BP	GO:0050919	negative chemotaxis	15/3084	37/11512	0.0480283	SEMA3B/SLIT2/SEMA6A/RYK/SEMA5A/SEMA3G/SLIT3/PLXNA3/SEMA4F/ITGB3/SEMA6C/FLRT3/SEMA6D/EFNA5/NRG1	15
BP	GO:0070266	necroptotic process	12/3084	28/11512	0.0482316	PPIF/YBX3/TLR3/PYGL/CASP8/FAS/CD14/CFLAR/FADD/DNM1L/ITPK1/PELI1	12
BP	GO:0006904	vesicle docking involved in exocytosis	14/3084	34/11512	0.0484134	STXBP2/SYTL2/VPS33A/RAB3A/RAB3D/PPFIA3/STXBP1/SNPH/SNAP25/STX1A/RAB15/UNC13A/KCNB1/CPLX2	14
BP	GO:0090313	regulation of protein targeting to membrane	13/3084	31/11512	0.0485117	ITGAM/CIB1/AKT2/PAK1/PRNP/GDI1/DMTN/FYN/CDK5R1/CACNB3/HPCA/KCNB1/MTCL1	13
BP	GO:0051224	negative regulation of protein transport	47/3084	141/11512	0.0497404	APOE/IRS1/EZR/MDFIC/LGR4/REST/SREBF1/APOD/ZC3H12A/NR1H3/HMGCR/RAB11FIP1/SP100/BTN2A2/TMSB4X/LYPLA1/WWP2/CPTP/TMBIM6/GAS6/NDFIP1/BARD1/MAP4K4/RAB11FIP5/SERGEF/IDH2/GDI1/BAG3/C1QTNF3/DMTN/PTGER4/TNFRSF21/STXBP5L/FN1/RSAD2/FKBP1B/TNFRSF4/CABP1/HDAC9/CD200/SYT11/CHGA/KCNB1/PKIA/INS/DRD2/OPRM1	47
BP	GO:0086003	cardiac muscle cell contraction	22/3084	59/11512	0.0499598	KCNQ1/GJA1/KCNN2/FGF12/KCNJ5/GPD1L/SNTA1/ATP1A1/CACNB2/CACNA2D1/ANK2/NOS1AP/GJC1/PDE4D/PKP2/CACNA1C/STC1/SCN2B/KCNH2/SCN3B/RYR2/ADORA1	22
CC	GO:0098984	neuron to neuron synapse	120/3236	290/11816	1.36396e-07	SLC6A9/NLGN3/PSD3/AKAP7/SYT12/CAMK1/HIP1R/CNN3/LRP4/SRC/SLC30A1/HOMER3/SH3GL1/DLG5/SPTBN1/ARHGAP32/CDH2/SYNPO/RAPGEF4/ARFGEF2/SRGAP2/MAP4/CPEB3/PKP4/ADD3/NSF/ATP1A1/DLG3/DNAJC6/CAMK2N1/MAGI2/CLSTN1/PRR7/PRNP/LZTS3/DGKZ/CRTC1/KCNAB2/DLG4/RUSC1/ARHGEF9/DMTN/LYN/GRIP2/LRP8/MAPK8IP2/LIN7B/PRKAR1B/BAIAP2/SEMA4F/FYN/DGKI/FABP5/NECTIN1/BSN/ADGRL1/ARHGAP44/CDK5R1/CPEB1/SYNDIG1/MAP1B/LIN7A/CLSTN3/PCLO/CHR…	120
CC	GO:0032279	asymmetric synapse	113/3236	271/11816	1.96351e-07	SLC6A9/NLGN3/PSD3/CAMK1/HIP1R/CNN3/LRP4/SRC/SLC30A1/HOMER3/SH3GL1/DLG5/SPTBN1/ARHGAP32/CDH2/SYNPO/ARFGEF2/SRGAP2/MAP4/CPEB3/PKP4/ADD3/NSF/ATP1A1/DLG3/DNAJC6/CAMK2N1/MAGI2/CLSTN1/PRR7/PRNP/LZTS3/DGKZ/CRTC1/KCNAB2/DLG4/RUSC1/ARHGEF9/DMTN/LYN/GRIP2/LRP8/MAPK8IP2/LIN7B/BAIAP2/SEMA4F/FYN/DGKI/FABP5/BSN/ADGRL1/ARHGAP44/CDK5R1/CPEB1/SYNDIG1/MAP1B/LIN7A/CLSTN3/PCLO/CHRM3/NSMF/NLGN4X/ADCY1/LZTS1/DBN1/CLST…	113
CC	GO:0014069	postsynaptic density	111/3236	267/11816	3.01512e-07	SLC6A9/PSD3/CAMK1/HIP1R/CNN3/LRP4/SRC/SLC30A1/HOMER3/SH3GL1/DLG5/SPTBN1/ARHGAP32/CDH2/SYNPO/SRGAP2/MAP4/CPEB3/PKP4/ADD3/NSF/ATP1A1/DLG3/DNAJC6/CAMK2N1/MAGI2/CLSTN1/PRR7/PRNP/LZTS3/DGKZ/CRTC1/KCNAB2/DLG4/RUSC1/ARHGEF9/DMTN/LYN/GRIP2/LRP8/MAPK8IP2/LIN7B/BAIAP2/SEMA4F/FYN/DGKI/FABP5/BSN/ADGRL1/ARHGAP44/CDK5R1/CPEB1/SYNDIG1/MAP1B/LIN7A/CLSTN3/PCLO/CHRM3/NSMF/NLGN4X/ADCY1/LZTS1/DBN1/CLSTN2/SAMD14/P2RX…	111
CC	GO:0097060	synaptic membrane	137/3236	350/11816	8.58525e-07	SLC6A9/NLGN3/PSD3/GPC4/CHRNB1/HIP1R/SRPX2/STX11/LRP4/COMT/STX4/SLC30A1/RIMS2/HOMER3/DNAJA3/DLG5/ARHGAP32/CDH2/SYNPO/SRGAP2/DNM1L/CPEB3/GABBR1/APBB1/DLG3/ATP2B1/CAMK2N1/CLSTN1/PRR7/PTPRA/LZTS3/DLG4/RUSC1/ARHGEF9/SYNJ1/CNTNAP1/KIAA1107/GLRB/GRIP2/ANK2/ERC2/LIN7B/BAIAP2/ADAM23/SEMA4F/DGKI/STXBP1/SNPH/FABP5/NECTIN1/PCDH17/ADGRL1/CPEB1/SYNDIG1/LIN7A/CLSTN3/CHRM3/CPE/KCNMA1/NSMF/SLC8A1/KCNC3/NLGN4X/ADC…	137
CC	GO:0099572	postsynaptic specialization	113/3236	288/11816	6.76685e-06	SLC6A9/PSD3/CAMK1/CHRNB1/HIP1R/CNN3/LRP4/SRC/SLC30A1/HOMER3/SH3GL1/DLG5/SPTBN1/ARHGAP32/CDH2/SYNPO/SRGAP2/MAP4/CPEB3/PKP4/ADD3/NSF/ATP1A1/DLG3/DNAJC6/CAMK2N1/MAGI2/CLSTN1/PRR7/PRNP/LZTS3/DGKZ/CRTC1/KCNAB2/DLG4/RUSC1/ARHGEF9/DMTN/LYN/GRIP2/LRP8/MAPK8IP2/LIN7B/BAIAP2/SEMA4F/FYN/DGKI/FABP5/BSN/ADGRL1/ARHGAP44/CDK5R1/CPEB1/SYNDIG1/MAP1B/LIN7A/CLSTN3/PCLO/CHRM3/NSMF/NLGN4X/ADCY1/LZTS1/DBN1/CLSTN2/SAMD…	113
CC	GO:0044297	cell body	172/3236	482/11816	2.89625e-05	STAR/APOE/KCNN2/INHA/SNCG/SIAH2/ASS1/PITPNM3/EZR/PRKAR2B/ITPR3/HIP1R/APOD/CNN3/FLNB/ELOVL5/LRP4/SLC1A3/CASP8/NQO1/WHRN/TXN2/COMT/GLRX2/PINK1/EIF4A3/CIB1/SMURF1/CAPN2/ENDOG/SLC38A2/TMEM50A/ITGA1/ITSN1/SYNPO/FADD/PMM2/PARD3/NCDN/RAPGEF2/FZD3/DCTN1/MAP1S/PAM/ATP7A/APBB1/DLG3/ATP2B1/CAMK2N1/EFHC1/SORT1/PTPRF/CNNM4/GNAZ/MYO5A/GDI1/CRTC1/RIN1/KIF5C/SLC31A1/MAPK8IP3/RUFY3/PTPRK/KIAA1107/KCNC4/LRP8/MAPK8…	172
CC	GO:0030672	synaptic vesicle membrane	38/3236	78/11816	4.68069e-05	SLC6A9/SYT12/SYPL1/DNM1L/VAMP2/WFS1/VAMP4/SCAMP1/SYNGR1/RAB3A/SLC17A5/DMXL2/SNCA/BSN/SCAMP5/SV2A/AMPH/RAB26/OPRD1/SYN2/SYP/ICA1/SYN1/STX1A/PTPRN2/SYT11/UNC13A/SYNGR3/SLC18A1/SYT1/SV2C/SYT5/RPH3A/RAB27B/SLC18A2/DRD2/SYT2/OPRK1	38
CC	GO:0099501	exocytic vesicle membrane	38/3236	78/11816	4.68069e-05	SLC6A9/SYT12/SYPL1/DNM1L/VAMP2/WFS1/VAMP4/SCAMP1/SYNGR1/RAB3A/SLC17A5/DMXL2/SNCA/BSN/SCAMP5/SV2A/AMPH/RAB26/OPRD1/SYN2/SYP/ICA1/SYN1/STX1A/PTPRN2/SYT11/UNC13A/SYNGR3/SLC18A1/SYT1/SV2C/SYT5/RPH3A/RAB27B/SLC18A2/DRD2/SYT2/OPRK1	38
CC	GO:0048786	presynaptic active zone	32/3236	63/11816	6.5742e-05	STX11/STX4/RIMS2/C1QBP/CDH2/FZD3/ATP2B1/RAB3A/CNTNAP1/PPFIA3/ERC2/DGKI/STXBP1/NECTIN1/BSN/ARHGAP44/PCLO/SV2A/CTNNA2/SYP/PPFIA2/NRXN1/SYN1/STX1A/APBA1/PPFIA4/SYT11/UNC13A/RIMS3/NTNG1/RIMS1/ADORA1	32
CC	GO:0045211	postsynaptic membrane	97/3236	256/11816	0.000141148	SLC6A9/NLGN3/PSD3/CHRNB1/COMT/SLC30A1/HOMER3/DNAJA3/DLG5/ARHGAP32/CDH2/SYNPO/SRGAP2/CPEB3/GABBR1/APBB1/DLG3/CAMK2N1/CLSTN1/PRR7/LZTS3/DLG4/RUSC1/ARHGEF9/GLRB/GRIP2/ANK2/LIN7B/SEMA4F/DGKI/FABP5/PCDH17/CPEB1/SYNDIG1/LIN7A/CLSTN3/CHRM3/KCNMA1/NSMF/SLC8A1/NLGN4X/ADCY1/LZTS1/DBN1/CLSTN2/FLRT3/CSPG5/P2RX6/CNKSR2/CACNA1C/GRIP1/NLGN1/CNTN1/GABRB3/PDLIM4/GABRD/PTPRO/CABP1/NRGN/OPRD1/CTNNA2/IGSF9B/DNM1/TIA…	97
CC	GO:0043025	neuronal cell body	150/3236	425/11816	0.000168444	STAR/APOE/KCNN2/INHA/SNCG/SIAH2/ASS1/PRKAR2B/ITPR3/HIP1R/APOD/CNN3/FLNB/ELOVL5/LRP4/SLC1A3/NQO1/WHRN/TXN2/GLRX2/EIF4A3/CIB1/SMURF1/CAPN2/ENDOG/SLC38A2/TMEM50A/ITGA1/ITSN1/SYNPO/PMM2/PARD3/NCDN/RAPGEF2/FZD3/DCTN1/MAP1S/PAM/ATP7A/APBB1/DLG3/ATP2B1/CAMK2N1/EFHC1/SORT1/PTPRF/CNNM4/MYO5A/GDI1/CRTC1/RIN1/KIF5C/SLC31A1/RUFY3/PTPRK/KCNC4/LRP8/MAPK8IP2/RAC3/BAIAP2/SLC4A8/SEMA4F/PLXDC1/KCNAB1/SNCA/PDE10A/D…	150
CC	GO:0098793	presynapse	144/3236	411/11816	0.000327266	SLC6A9/NLGN3/GPC4/ITGA2/SYT12/SLC2A4/STX11/STX4/RIMS2/BLVRB/SNAP23/SH3GL1/SYPL1/SLC2A8/C1QBP/ITSN1/CDH2/DNM1L/FZD3/GIT1/VAMP2/GABBR1/PFN2/APBB1/SLC9A6/CACNB2/DNAJC6/ATP2B1/WFS1/VAMP4/AP1S1/SCAMP1/KCNAB2/SYNGR1/DLG4/RAB3A/NAAA/SYNJ1/SLC17A5/DMXL2/PPFIBP2/CNTNAP1/KIAA1107/RAB3D/CYP46A1/GNB5/KCNC4/PPFIA3/ERC2/APBA2/LIN7B/BAIAP2/ADAM23/SLC29A2/MICAL1/SNCA/DGKI/STXBP1/SNPH/NECTIN1/BSN/PCDH17/ADGRL1/AR…	144
CC	GO:0060076	excitatory synapse	22/3236	41/11816	0.00032984	SLC6A9/NLGN3/FGFR2/SRPX2/DLG4/BAIAP2/DGKI/BSN/SYNDIG1/NLGN4X/P2RX6/NLGN1/CTNNA2/SYP/AKAP5/CADM3/SYT11/PLCB4/SYT1/GRIA2/LRRTM2/CBLN1	22
CC	GO:0044309	neuron spine	58/3236	147/11816	0.000942184	KCNN2/PALMD/PRKAR2B/LAMA2/HIP1R/FARP1/CNN3/COMT/STX4/CTTN/ITSN1/ARHGAP32/SYNPO/ARFGEF2/SRGAP2/ABI2/APBB1/SLC9A6/ATP2B1/CLSTN1/ARHGAP33/DLG4/APBA2/BAIAP2/DGKI/ARHGAP44/CDK5R1/SYNDIG1/MAP1B/SLC8A1/KCNC3/LZTS1/P2RX6/NLGN1/PDLIM4/PTPRO/NRGN/OPRD1/DNM1/DDN/PSD/HPCA/AKAP5/TIAM1/APBA1/GRIN2A/ARC/SYT11/MPP2/GRIA2/GRIA4/NEURL1/SLC8A2/MAPT/RPH3A/ADORA1/DRD2/OPRM1	58
CC	GO:0034703	cation channel complex	63/3236	163/11816	0.00108833	KCNQ1/PORCN/KCNJ5/KCNMB4/CACNA1H/HSPA2/CTTN/VAMP2/DLG3/CACNB2/KCNAB2/DLG4/CACNA2D1/MCUB/KCNC4/KCNAB1/TRPC1/PKD1/CACNB1/TRPC6/SCN8A/FKBP1B/NOS1AP/PDE4D/KCNMA1/KCNC3/AKAP6/KCND1/KCNMB2/CACNA1C/CACNB3/NLGN1/CACNA2D2/KCNQ3/SCN2B/HCN4/GRIK3/SNAP25/GRIK2/CACNA2D3/STX1A/GRIN2A/KCNH2/SCN3B/KCNC1/GRIA2/DPP6/KCNB1/GRIA4/SCN2A/SCN9A/GRIK5/KCNQ2/CACNA1B/RYR2/SCN3A/KCNH1/CACNG4/KCNA3/KCNB2/CACNG2/CNTNAP2/KCNJ6	63
CC	GO:0043197	dendritic spine	57/3236	145/11816	0.0011506	KCNN2/PALMD/PRKAR2B/LAMA2/HIP1R/FARP1/CNN3/COMT/STX4/CTTN/ITSN1/ARHGAP32/SYNPO/ARFGEF2/SRGAP2/ABI2/APBB1/ATP2B1/CLSTN1/ARHGAP33/DLG4/APBA2/BAIAP2/DGKI/ARHGAP44/CDK5R1/SYNDIG1/MAP1B/SLC8A1/KCNC3/LZTS1/P2RX6/NLGN1/PDLIM4/PTPRO/NRGN/OPRD1/DNM1/DDN/PSD/HPCA/AKAP5/TIAM1/APBA1/GRIN2A/ARC/SYT11/MPP2/GRIA2/GRIA4/NEURL1/SLC8A2/MAPT/RPH3A/ADORA1/DRD2/OPRM1	57
CC	GO:0042734	presynaptic membrane	55/3236	140/11816	0.0014142	SLC6A9/GPC4/STX11/STX4/RIMS2/CDH2/DNM1L/GABBR1/APBB1/ATP2B1/CNTNAP1/KIAA1107/ERC2/ADAM23/DGKI/STXBP1/SNPH/NECTIN1/PCDH17/ADGRL1/CHRM3/KCNC3/CNTN1/OPRD1/CTNNA2/DNM1/SYP/NRXN1/GRIK3/SNAP25/GRIK2/STX1A/APBA1/GRIN2A/CADM3/SYT11/KCNC1/UNC13A/RIMS3/SYT1/SCN2A/SNAP91/EFNB3/NTNG1/RIMS1/GRIK5/CHRNB2/KCNH1/KCNA3/ADORA1/DRD2/SLC6A2/GRM8/OPRM1/OPRK1	55
CC	GO:0070382	exocytic vesicle	60/3236	156/11816	0.00161826	SLC6A9/SYT12/STX11/STX4/SYTL2/SYPL1/SLC2A8/DNM1L/VAMP2/WFS1/VAMP4/SCAMP1/SYNGR1/DLG4/RAB3A/SLC17A5/DMXL2/KIAA1107/RAB3D/APBA2/SNCA/DGKI/BSN/SCAMP5/SV2A/TRIM9/SYT17/AMPH/RAB26/OPRD1/DNM1/SYN2/SYP/DPYSL3/ICA1/SNAP25/SYN1/STX1A/APBA1/GRIN2A/TH/RAB15/PTPRN2/SYT11/UNC13A/SYNGR3/SLC18A1/SYT1/SNAP91/SV2C/KIF1A/DDC/SYT5/RPH3A/RAB27B/SLC18A2/DRD2/PENK/SYT2/OPRK1	60
CC	GO:0005871	kinesin complex	20/3236	40/11816	0.00193095	KIF16B/KIF17/KIF1C/KIF22/KIF2A/KLC1/KLC2/KIF11/KIF2C/KIFC1/KIF5C/KIFAP3/KIF3A/KIF15/KIF20A/KIF3C/KIF4A/KIF18B/KIF5A/KIF1A	20
CC	GO:0098831	presynaptic active zone cytoplasmic component	9/3236	13/11816	0.0019998	RIMS2/PPFIA3/ERC2/BSN/PCLO/CTNNA2/UNC13A/RIMS3/RIMS1	9
CC	GO:0008021	synaptic vesicle	57/3236	149/11816	0.00240331	SLC6A9/SYT12/STX11/STX4/SYPL1/SLC2A8/DNM1L/VAMP2/WFS1/VAMP4/SCAMP1/SYNGR1/DLG4/RAB3A/SLC17A5/DMXL2/KIAA1107/RAB3D/APBA2/SNCA/DGKI/BSN/SCAMP5/SV2A/TRIM9/AMPH/RAB26/OPRD1/DNM1/SYN2/SYP/ICA1/SNAP25/SYN1/STX1A/APBA1/GRIN2A/TH/RAB15/PTPRN2/SYT11/UNC13A/SYNGR3/SLC18A1/SYT1/SNAP91/SV2C/KIF1A/DDC/SYT5/RPH3A/RAB27B/SLC18A2/DRD2/PENK/SYT2/OPRK1	57
CC	GO:0044306	neuron projection terminus	46/3236	116/11816	0.00268195	ITGA2/FSTL3/BLVRB/ITSN1/GIT1/VAMP2/SLC9A6/AP1S1/KCNAB2/DLG4/RAB3A/SYNJ1/KIAA1107/KCNC4/BAIAP2/MICAL1/SNCA/DGKI/BSN/CHRM3/SCRG1/FLRT3/GCH1/OPRD1/SYP/GRIK3/GRIK2/TH/PTPRN2/SYT11/KCNC1/UNC13A/SLC18A1/UCHL1/SYT1/FLRT1/GRIK5/KCNA3/ADORA1/SLC18A2/PTPRN/DRD2/CPLX2/PENK/ADCYAP1/OPRK1	46
CC	GO:0120111	neuron projection cytoplasm	29/3236	67/11816	0.00362049	KIF17/WLS/HIP1R/HIF1A/KIF1C/DYNC1H1/AP3M2/KIF5C/DLG4/MAPK8IP3/KIF3A/WASF1/BAIAP2/KCNAB1/KIF4A/AP3B2/HPCA/GRIK3/GRIK2/MAP1A/MAP2/UCHL1/TRIM46/NEFL/KIF5A/MAPT/KIF1A/RAB27B/OPRM1	29
CC	GO:0033267	axon part	108/3236	315/11816	0.00381266	ITGA2/NDRG2/HIF1A/WHRN/PINK1/KIF1C/CIB1/BLVRB/CTTN/SPTBN1/ITSN1/PARD3/MYO9A/GIT1/DYNC1H1/AP3M2/APBB1/KLC1/DLG3/SLC9A6/AP1S1/MYO5A/NFASC/KIF5C/KCNAB2/DLG4/MAPK8IP3/STMN3/KIF3A/RAB3A/RUFY3/SYNJ1/ORAI2/CNTNAP1/AUTS2/ANK2/KCNC4/ERC2/RAC3/MAP3K12/MICAL1/KCNAB1/SNCA/DGKI/TUBB3/FEZ1/TMOD2/NECTIN1/BASP1/ADGRL1/KIF4A/CDK5R1/OLFM1/SCN8A/MAP1B/CHRM3/THY1/DBN1/GDPD5/FLRT3/BRSK2/PCDH9/INPP5J/AP3B2/KCNQ3/PTPRO…	108
CC	GO:0030424	axon	162/3236	494/11816	0.00389182	SNCG/ITGA2/NDRG2/LDLRAP1/ACADM/ROBO3/HIF1A/SEMA6A/WHRN/COMT/PINK1/KIF1C/CIB1/SMURF1/SLC38A2/BLVRB/CTTN/SPTBN1/ITSN1/PARD3/ATAT1/MYO9A/MAP4/FZD3/DCTN1/NEK3/GIT1/DYNC1H1/AP3M2/APBB1/KLC1/DLG3/SLC9A6/PAK1/TENM3/AP1S1/DTNA/MAP7/MYO5A/GDI1/NFASC/KIF5C/KCNAB2/DLG4/MAPK8IP3/STMN3/KIF3A/RAB3A/RUFY3/SYNJ1/ORAI2/PTPRK/CNTNAP1/KIAA1107/AUTS2/TNFRSF21/MAP9/ANK2/KCNC4/ERC2/LRP8/RAC3/MAP3K12/MICAL1/KCNAB1/SNCA…	162
CC	GO:0098686	hippocampal mossy fiber to CA3 synapse	15/3236	29/11816	0.00462981	SLC6A9/AKAP7/SYT12/SH3GL1/RAPGEF4/PRKAR1B/NECTIN1/ADCY1/CTNNA2/GRIK2/SYT1/EFNB3/GRIK5/LRRTM2/CACNG2	15
CC	GO:0098563	intrinsic component of synaptic vesicle membrane	18/3236	37/11816	0.00467104	SLC6A9/SYPL1/WFS1/VAMP4/SYNGR1/RAB3A/SV2A/RAB26/OPRD1/SYP/SYN1/STX1A/PTPRN2/SYT11/SYT1/SV2C/RAB27B/OPRK1	18
CC	GO:0005759	mitochondrial matrix	121/3236	360/11816	0.00486446	CYP11A1/FDX1/FDXR/ACSF2/ALAS1/TST/PPIF/HSPD1/HSPE1/PDK4/RIDA/MPST/HIBCH/ACADS/ALDH2/GRPEL1/LRRC59/PCCB/LONP1/PCCA/ACADM/ACADVL/LACTB2/MCCC1/HADHB/PRDX3/BCAT2/ACAT1/TFB2M/ETFDH/TXNRD2/POLDIP2/ACSS3/DECR1/DBT/MCCC2/MRPS22/ETFA/SUCLG2/IBA57/SUOX/PDK1/MRPL46/TWNK/PC/PDSS2/AASS/ALDH7A1/ALDH1B1/PDP1/TXN2/MLYCD/MRPS28/ALDH6A1/MRPL49/WARS2/GLRX2/PITRM1/REXO2/FASTKD5/FH/BCKDHA/RARS2/MIPEP/MRPL16/HMGCL/AUH…	121
CC	GO:0098978	glutamatergic synapse	101/3236	296/11816	0.00587625	APOE/NLGN3/GPC4/CAMK1/PRKAR2B/WASF3/PORCN/PACSIN2/SRC/EIF4A3/STX4/SH3GL1/SPTBN1/C1QBP/ITSN1/EPS15/SYNPO/ACTN1/PFN2/DLG3/ATP2B1/CLSTN1/PRR7/MYO5A/DGKZ/CRTC1/ABLIM3/DLG4/LYN/GRIP2/PPM1H/PPFIA3/ERC2/PRKAR1B/BAIAP2/ADAM23/FYN/DGKI/DGKE/STXBP1/BSN/PCDH17/ARHGAP44/NOS1AP/ARHGAP22/CLSTN3/ITGB3/CHRM3/ACTC1/NLGN4X/SV2A/ADCY1/DBN1/CLSTN2/FLRT3/CSPG5/P2RX6/CNKSR2/GRIP1/NLGN1/CALY/GABRD/PTPRO/NRGN/DNM1/SYN2/…	101
CC	GO:0030285	integral component of synaptic vesicle membrane	14/3236	27/11816	0.00599614	SLC6A9/SYPL1/WFS1/VAMP4/SYNGR1/SV2A/OPRD1/SYP/STX1A/PTPRN2/SYT11/SYT1/SV2C/OPRK1	14
CC	GO:0032839	dendrite cytoplasm	14/3236	27/11816	0.00599614	KIF17/WLS/HIP1R/KIF5C/DLG4/WASF1/BAIAP2/KCNAB1/HPCA/GRIK3/GRIK2/MAP2/KIF5A/OPRM1	14
CC	GO:0034705	potassium channel complex	31/3236	75/11816	0.00616419	KCNQ1/KCNJ5/KCNMB4/CTTN/VAMP2/KCNAB2/DLG4/KCNC4/KCNAB1/NOS1AP/KCNMA1/KCNC3/KCND1/KCNMB2/KCNQ3/HCN4/GRIK3/SNAP25/GRIK2/STX1A/KCNH2/KCNC1/DPP6/KCNB1/GRIK5/KCNQ2/KCNH1/KCNA3/KCNB2/CNTNAP2/KCNJ6	31
CC	GO:0032809	neuronal cell body membrane	12/3236	22/11816	0.00641567	ATP2B1/KCNC4/SLC4A8/KCNC3/THY1/HPCA/KCNC1/KCNB1/FLRT1/ATP1A3/KCNB2/SLC6A2	12
CC	GO:0044298	cell body membrane	12/3236	22/11816	0.00641567	ATP2B1/KCNC4/SLC4A8/KCNC3/THY1/HPCA/KCNC1/KCNB1/FLRT1/ATP1A3/KCNB2/SLC6A2	12
CC	GO:0044304	main axon	25/3236	58/11816	0.00707913	SPTBN1/PARD3/APBB1/NFASC/KCNAB2/DLG4/CNTNAP1/ANK2/KCNAB1/SCN8A/MAP1B/THY1/KCNQ3/SPTBN4/DNM1/TIAM1/MAP1A/MAP2/KCNC1/TRIM46/SCN2A/KCNQ2/MAPT/ADORA1/CNTNAP2	25
CC	GO:0150034	distal axon	82/3236	238/11816	0.00931764	ITGA2/NDRG2/WHRN/PINK1/CIB1/BLVRB/CTTN/ITSN1/PARD3/MYO9A/GIT1/APBB1/KLC1/DLG3/SLC9A6/AP1S1/MYO5A/KIF5C/KCNAB2/MAPK8IP3/STMN3/RAB3A/RUFY3/SYNJ1/ORAI2/AUTS2/KCNC4/ERC2/RAC3/MAP3K12/MICAL1/SNCA/DGKI/TUBB3/FEZ1/TMOD2/NECTIN1/BASP1/ADGRL1/CDK5R1/OLFM1/MAP1B/CHRM3/THY1/DBN1/GDPD5/FLRT3/BRSK2/PCDH9/INPP5J/PTPRO/OPRD1/SYP/DPYSL3/TIAM1/GRIK3/SNAP25/GRIK2/TH/MAP2/PTPRN2/SYT11/KCNC1/UNC13A/SLC18A1/GAP43/GRI…	82
CC	GO:0008076	voltage-gated potassium channel complex	28/3236	68/11816	0.00951672	KCNQ1/KCNJ5/KCNMB4/CTTN/VAMP2/KCNAB2/DLG4/KCNC4/KCNAB1/NOS1AP/KCNMA1/KCNC3/KCND1/KCNMB2/KCNQ3/HCN4/SNAP25/STX1A/KCNH2/KCNC1/DPP6/KCNB1/KCNQ2/KCNH1/KCNA3/KCNB2/CNTNAP2/KCNJ6	28
CC	GO:0098982	GABA-ergic synapse	26/3236	63/11816	0.0117985	NLGN3/C1QBP/GABBR1/ATP2B1/CLSTN1/GLRB/ERC2/BSN/PCDH17/CDH13/CLSTN3/NLGN4X/SV2A/CSPG5/EFNA5/GABRB3/GABRD/PTPRO/IGSF9B/NRG1/NRXN1/GABRG2/GAP43/IQSEC3/LRRTM2/DRD2	26
CC	GO:0098685	Schaffer collateral - CA1 synapse	28/3236	69/11816	0.0119142	SLC30A1/SH3GL1/SYNPO/IQSEC2/GABBR1/PFN2/PTPRA/APBA2/PRKAR1B/BAIAP2/FYN/DGKI/BSN/ADCY1/SYN2/SYP/NRXN1/SYN1/DGKB/APBA1/SYT11/TNR/NTNG1/INA/NEFL/TUBB2B/LRRTM2/CACNG2	28
CC	GO:0034702	ion channel complex	77/3236	224/11816	0.0121666	KCNQ1/CHRNB1/LRRC8D/LRRC8B/PORCN/KCNJ5/KCNMB4/CLCN2/CACNA1H/HSPA2/CTTN/VAMP2/DLG3/CACNB2/KCNAB2/DLG4/CACNA2D1/MCUB/GLRB/KCNC4/KCNAB1/TRPC1/PKD1/CACNB1/TRPC6/SCN8A/FKBP1B/NOS1AP/ANO1/PDE4D/KCNMA1/KCNC3/AKAP6/KCND1/KCNMB2/CACNA1C/CACNB3/NLGN1/CACNA2D2/GABRB3/KCNQ3/GABRD/SCN2B/HCN4/GRIK3/SNAP25/GRIK2/CACNA2D3/STX1A/GRIN2A/KCNH2/SCN3B/KCNC1/GABRG2/GRIA2/DPP6/GABRQ/KCNB1/GRIA4/CHRNB4/SCN2A/SCN9A/CHRNA…	77
CC	GO:0030315	T-tubule	20/3236	46/11816	0.0135922	RDX/EZR/KCNJ5/PRX/SLC2A4/SLC30A1/RTN2/ATP1A1/CACNB2/CACNA2D1/ANK2/NOS1AP/SLC8A1/AKAP6/STAC/CACNA1C/CACNB3/AHNAK2/SCN2A/CACNG4	20
CC	GO:0043194	axon initial segment	9/3236	16/11816	0.0139569	NFASC/ANK2/SCN8A/KCNQ3/SPTBN4/MAP1A/MAP2/TRIM46/KCNQ2	9
CC	GO:0043204	perikaryon	41/3236	110/11816	0.0147508	ASS1/ENDOG/ITGA1/SYNPO/PAM/ATP7A/RUFY3/SEMA4F/KCNAB1/PDE10A/OLFM1/MAP1B/SERPINI1/NSMF/KCNC3/TMEM100/CACNA1C/ASTN2/ENO2/DDN/HPCA/TTLL7/GRIK3/GRIK2/PCSK2/TH/DRP2/KCNB1/NEURL1/SLC8A2/CTNND2/GRIK5/KCNH1/KCNB2/PTPRN/DRD2/PENK/CNTNAP2/OPRM1/ADCYAP1/OPRK1	41
CC	GO:0031252	cell leading edge	112/3236	343/11816	0.0166022	ADGRV1/RDX/PSD3/IQGAP2/SLC9A3R1/ASAP3/EZR/WASF3/WLS/PSD4/CXCR4/ANTXR1/HIP1R/PACSIN2/ABLIM1/TESC/CARMIL1/PLEKHO1/CTNNA1/MTM1/ENAH/PIK3CA/SRC/SNX5/STX4/CIB1/EPHA2/SLC39A14/ACTR3/FGD2/CTTN/SORBS2/SPTBN1/PKN2/ITSN1/CDH2/AKT2/WASF2/SRGAP2/ABI2/TPM1/ACTN1/MTMR9/EVL/ATP7A/APBB1/LDB1/ARAP3/ATP2B1/MCC/PDLIM7/PAK1/ARHGEF26/CLASP2/LIMK1/MYO5A/PLEKHA1/DGKZ/PARD6A/AMOT/ABLIM3/PTPRM/SLC39A6/ATP6V1B2/SH2B2/SSX2…	112
CC	GO:0048787	presynaptic active zone membrane	13/3236	27/11816	0.0170203	STX11/STX4/CDH2/ATP2B1/CNTNAP1/DGKI/STXBP1/NECTIN1/NRXN1/STX1A/APBA1/SYT11/NTNG1	13
CC	GO:0043195	terminal bouton	19/3236	44/11816	0.0172844	BLVRB/AP1S1/RAB3A/SYNJ1/MICAL1/SNCA/SYP/GRIK3/GRIK2/TH/PTPRN2/SYT11/UNC13A/SLC18A1/GRIK5/ADORA1/SLC18A2/CPLX2/ADCYAP1	19
CC	GO:1902495	transmembrane transporter complex	82/3236	244/11816	0.0180206	KCNQ1/CHRNB1/LRRC8D/ATP1B3/LRRC8B/PORCN/KCNJ5/KCNMB4/CLCN2/CACNA1H/HSPA2/CTTN/VAMP2/ATP1A1/DLG3/CACNB2/KCNAB2/DLG4/CACNA2D1/MCUB/GLRB/KCNC4/ABCA2/KCNAB1/TRPC1/PKD1/CACNB1/ATP1B1/TRPC6/SCN8A/FKBP1B/NOS1AP/ANO1/PDE4D/KCNMA1/KCNC3/AKAP6/KCND1/KCNMB2/CACNA1C/CACNB3/NLGN1/CACNA2D2/GABRB3/KCNQ3/GABRD/SCN2B/HCN4/GRIK3/SNAP25/GRIK2/CACNA2D3/STX1A/GRIN2A/KCNH2/SCN3B/KCNC1/GABRG2/GRIA2/DPP6/GABRQ/KCNB1/GRI…	82
CC	GO:0005891	voltage-gated calcium channel complex	14/3236	30/11816	0.0184826	CACNA1H/HSPA2/CACNB2/CACNA2D1/CACNB1/NOS1AP/PDE4D/CACNA1C/CACNB3/CACNA2D2/CACNA2D3/CACNA1B/CACNG4/CACNG2	14
CC	GO:0031256	leading edge membrane	52/3236	147/11816	0.0200397	ADGRV1/PSD3/EZR/WLS/PSD4/ANTXR1/HIP1R/PACSIN2/TESC/PLEKHO1/SRC/CIB1/EPHA2/FGD2/SPTBN1/AKT2/TPM1/MTMR9/ATP2B1/PAK1/CLASP2/PLEKHA1/SLC39A6/PTPRK/ABCA7/KCNC4/PTPRJ/CD44/ARHGAP44/CSPG4/ITGB3/KCNC3/THY1/AMPH/ARHGEF4/OPRD1/DDN/APC2/PSD/HPCA/AKAP5/FAP/TIAM1/KCNC1/GABRG2/MPP2/KCNB1/MAPT/ADORA1/SNTG1/CNTNAP2/OPRM1	52
CC	GO:0030658	transport vesicle membrane	56/3236	160/11816	0.0203038	SLC6A9/SYT12/SCAP/SREBF1/CLTCL1/CEACAM1/MCFD2/SEC24A/SYPL1/DNM1L/VAMP2/PAM/WFS1/VAMP4/RAB11FIP5/AP1S1/SCAMP1/SYNGR1/RAB3A/SLC17A5/DMXL2/SNCA/CUZD1/BSN/ECE2/SCAMP5/CPE/SV2A/AMPH/NCALD/RAB26/NRGN/OPRD1/SYN2/SYP/ICA1/SYN1/STX1A/PTPRN2/SYT11/UNC13A/SYNGR3/SLC18A1/CHGA/SYT1/SV2C/SCG3/DBH/SYT5/RPH3A/RAB27B/SLC18A2/PTPRN/DRD2/SYT2/OPRK1	56
CC	GO:0097038	perinuclear endoplasmic reticulum	9/3236	17/11816	0.022553	OSBP/CAPN2/OSBP2/PIK3R1/OSBPL7/FYN/OSBPL3/GDPD5/NOX4	9
CC	GO:0099091	postsynaptic specialization, intracellular component	10/3236	20/11816	0.0261178	SRC/SH3GL1/DLG3/PRR7/LYN/BAIAP2/FYN/CTNNA2/PSD/TANC2	10
CC	GO:0034704	calcium channel complex	19/3236	46/11816	0.0286056	CACNA1H/HSPA2/CACNB2/CACNA2D1/MCUB/PKD1/CACNB1/FKBP1B/NOS1AP/PDE4D/AKAP6/CACNA1C/CACNB3/CACNA2D2/CACNA2D3/CACNA1B/RYR2/CACNG4/CACNG2	19
CC	GO:1990351	transporter complex	83/3236	252/11816	0.0286622	KCNQ1/CHRNB1/LRRC8D/ATP1B3/LRRC8B/PORCN/KCNJ5/KCNMB4/CLCN2/CACNA1H/HSPA2/TIMM8B/CTTN/VAMP2/ATP1A1/DLG3/CACNB2/KCNAB2/DLG4/CACNA2D1/MCUB/GLRB/KCNC4/ABCA2/KCNAB1/TRPC1/PKD1/CACNB1/ATP1B1/TRPC6/SCN8A/FKBP1B/NOS1AP/ANO1/PDE4D/KCNMA1/KCNC3/AKAP6/KCND1/KCNMB2/CACNA1C/CACNB3/NLGN1/CACNA2D2/GABRB3/KCNQ3/GABRD/SCN2B/HCN4/GRIK3/SNAP25/GRIK2/CACNA2D3/STX1A/GRIN2A/KCNH2/SCN3B/KCNC1/GABRG2/GRIA2/DPP6/GABRQ/KC…	83
CC	GO:0031045	dense core granule	8/3236	15/11816	0.0296685	STXBP5L/MYRIP/OPRD1/SYT1/SCG2/SYT5/PENK/SYT2	8
CC	GO:0032280	symmetric synapse	6/3236	10/11816	0.0306999	NLGN3/ARFGEF2/NLGN4X/IGSF9B/IQSEC3/PENK	6
CC	GO:0099061	integral component of postsynaptic density membrane	15/3236	35/11816	0.0349103	SLC30A1/CLSTN1/CLSTN3/CHRM3/ADCY1/CLSTN2/PTPRO/OPRD1/PLPPR4/GRIN2A/EFNB3/GRIK5/CACNG4/LRRTM2/CACNG2	15
CC	GO:0009295	nucleoid	16/3236	38/11816	0.0355034	LRRC59/LONP1/ACADVL/HADHB/TFB2M/POLDIP2/DBT/TWNK/FASTKD5/CLPX/ELAC2/HSPA9/TFB1M/ATAD3A/GRSF1/DNA2	16
CC	GO:0042645	mitochondrial nucleoid	16/3236	38/11816	0.0355034	LRRC59/LONP1/ACADVL/HADHB/TFB2M/POLDIP2/DBT/TWNK/FASTKD5/CLPX/ELAC2/HSPA9/TFB1M/ATAD3A/GRSF1/DNA2	16
CC	GO:0032589	neuron projection membrane	19/3236	47/11816	0.0360088	ADGRV1/WLS/SPTBN1/ATP2B1/KCNC4/KCNC3/THY1/OPRD1/DDN/HPCA/AKAP5/KCNC1/GABRG2/MPP2/KCNB1/MAPT/ADORA1/CNTNAP2/OPRM1	19
CC	GO:0098797	plasma membrane protein complex	146/3236	469/11816	0.0369588	KCNQ1/KRT8/SNTB1/GJA1/IRS1/PGM5/VTN/INHA/VCAM1/TGFBR3/ITGA2/CHRNB1/EGFR/ITGA9/ATP1B3/OSMR/PORCN/HIP1R/KCNJ5/KCNMB4/TFRC/GNG12/HFE/CACNA1H/LRP5/CASP8/CTNNA1/HSPA2/HLA-DMA/FAS/EBI3/ITGAM/CEACAM1/PRKCA/SDHA/HLA-DMB/GNAI1/ITGA1/CTTN/CFLAR/EPS15/CDH2/FADD/SLC3A2/NDUFS1/VAMP2/GNG7/AP2A2/SNTA1/GABBR1/TGFBR1/ATP1A1/ATP6AP1/ACVR1/DLG3/C5/CACNB2/TNK2/GNAZ/ITGB8/KCNAB2/DLG4/CACNA2D1/SYNJ1/SHC1/LYN/ACVR1B/KI…	146
CC	GO:0032281	AMPA glutamate receptor complex	7/3236	13/11816	0.0392135	PORCN/DLG3/DLG4/GRIA2/GRIA4/CACNG4/CACNG2	7
CC	GO:0045239	tricarboxylic acid cycle enzyme complex	7/3236	13/11816	0.0392135	DBT/SUCLG2/FH/BCKDHA/DLD/DLST/OGDHL	7
CC	GO:0005874	microtubule	96/3236	300/11816	0.0416372	KIF16B/KIF17/GRAMD2B/CDK2AP2/NUSAP1/NUDC/SERP1/NEK7/KIF1C/MTUS1/KLHL21/PARP4/TPT1/BCL10/ARFGEF2/TTLL4/ATAT1/KIF22/DNM1L/MAP4/SPACA9/STIM1/DCTN1/CKAP2/DCLK2/SVIL/GAS8/BEX4/MAP1S/DYNC1H1/KIF2A/CEP170/KLC1/KLC2/TBCB/PLK1/KIF11/MAP7/CLASP2/SPAG5/KIF2C/MYO5A/KIFC1/KIF5C/KCNAB2/KIFAP3/KIF3A/RUSC1/SYNJ1/KIF15/CDK1/CFAP20/TUBA1A/TCP11L1/MAP9/PRC1/KIF20A/RAB3D/KIF3C/PSRC1/BIRC5/RACGAP1/LRRC49/BAIAP2/MAPRE…	96
CC	GO:0032590	dendrite membrane	14/3236	33/11816	0.0445992	WLS/ATP2B1/KCNC4/KCNC3/THY1/OPRD1/DDN/HPCA/AKAP5/KCNC1/GABRG2/MPP2/KCNB1/OPRM1	14
CC	GO:0097526	spliceosomal tri-snRNP complex	0/3236	27/11816	1		0
MF	GO:0017075	syntaxin-1 binding	11/3079	18/11509	0.00225086	STXBP2/SYPL1/VAMP2/NSF/STXBP1/SNPH/SYP/SNAP25/UNC13A/SYT1/CPLX2	11
MF	GO:0031690	adrenergic receptor binding	11/3079	18/11509	0.00225086	SLC9A3R1/SH3GL1/C1QBP/RAPGEF2/MAGI2/DLG4/GNAS/PDE4D/AKAP5/UCHL1/APLP1	11
MF	GO:0008376	acetylgalactosaminyltransferase activity	14/3079	26/11509	0.00303676	ABO/GALNT10/GALNT2/CHSY1/B3GNT2/CHPF/B3GALT2/B3GALT1/GALNT8/B4GALNT1/GALNT6/B3GNT4/B3GALT5/GALNT14	14
MF	GO:0015298	solute:cation antiporter activity	12/3079	21/11509	0.00312922	SLC8B1/SLC11A1/SLC9A8/SLC3A2/SLC9A6/SLC9A7/CLCN5/CLCN4/SLC9A5/SLC8A1/SLC24A2/SLC8A2	12
MF	GO:0050662	coenzyme binding	86/3079	248/11509	0.00330604	AOX1/DHCR24/ALAS1/SOAT1/P3H2/IDH1/TM7SF2/FMO2/CTH/CAT/STEAP4/H6PD/DHCR7/POR/ACADS/ALDH2/PCCA/ALDH1A1/ACADM/ACADVL/BDH2/MCCC1/NQO2/ACAT1/PYGL/GRHPR/AIFM1/SORD/ETFDH/MAOB/GPD1L/TXNRD2/DECR1/DBT/ETFA/GCAT/PHYH/SUOX/HMGCR/SIRT1/UGDH/PC/SQOR/ALDH1B1/ECI2/FMO5/ALDH6A1/SDHA/MMACHC/LDHB/HMGCL/TXNRD1/SHMT1/DLD/NFS1/TPMT/GLUD1/COQ6/ME1/SQLE/SPTLC2/KYAT3/NDUFS2/SCP2/ATAT1/PLOD3/PAM/P4HTM/IDH2/ACOT11/CBR3/SG…	86
MF	GO:0015631	tubulin binding	88/3079	258/11509	0.00501807	GJA1/CCDC69/KIF16B/EZR/KIF17/NUSAP1/CNN3/RGS2/KIF1C/MTUS1/VAPA/TTLL4/KIF22/DNM1L/MAP4/MARK4/STIM1/DCTN1/GAS8/BEX4/MAP1S/KIF2A/MAP4K4/TTBK2/RAB11FIP5/EFHC1/PLK1/AGTPBP1/PRNP/KIF11/CLASP2/SPAG5/KIF2C/KIFC1/BRCA2/KIF5C/STMN3/KIF3A/LYN/KIF15/JAKMIP2/MAP9/PRC1/KIF20A/ARL4C/KIF3C/PSRC1/BIRC5/RACGAP1/FCHO1/MAPRE3/TRIM36/SNCA/FYN/FEZ1/KIF4A/CDK5R1/MAP1B/STMN1/LZTS1/KIF18B/NEFM/PACRG/NCALD/TPPP3/TPPP/DNM1…	88
MF	GO:0005001	transmembrane receptor protein tyrosine phosphatase activity	10/3079	17/11509	0.00526314	PTPRE/PTPRH/PTPRA/PTPRF/PTPRM/PTPRK/PTPRU/PTPRO/PTPRR/PTPRN2	10
MF	GO:0015491	cation:cation antiporter activity	10/3079	17/11509	0.00526314	SLC8B1/SLC11A1/SLC9A8/SLC3A2/SLC9A6/SLC9A7/SLC9A5/SLC8A1/SLC24A2/SLC8A2	10
MF	GO:0019198	transmembrane receptor protein phosphatase activity	10/3079	17/11509	0.00526314	PTPRE/PTPRH/PTPRA/PTPRF/PTPRM/PTPRK/PTPRU/PTPRO/PTPRR/PTPRN2	10
MF	GO:0015079	potassium ion transmembrane transporter activity	44/3079	117/11509	0.00640546	KCNQ1/KCNN2/KCNK3/ATP1B3/SLC12A2/KCNJ5/KCNMB4/SLC12A4/SLC9A8/ATP1A1/SLC9A6/SLC12A5/SLC9A7/KCNAB2/KCNC4/KCNAB1/SLC9A5/KCNK15/ATP1B1/KCNK7/KCNJ12/KCNMA1/KCNC3/KCND1/KCNMB2/KCNN3/KCNQ3/HCN4/GRIK3/SNAP25/GRIK2/KCNH2/SLC24A2/KCNC1/KCNB1/GRIK5/KCNQ2/ATP1A3/KCNH1/KCNA3/KCNH6/KCNB2/KCNK12/KCNJ6	44
MF	GO:0032934	sterol binding	21/3079	49/11509	0.0106269	STAR/APOE/SOAT1/ABCA1/GRAMD1B/NPC1/SCAP/RORA/APOD/NR1H3/OSBP/TSPO/OSBP2/OSBPL1A/OSBPL11/SCP2/CD81/OSBPL7/OSBPL3/RORC/SYP	21
MF	GO:0008017	microtubule binding	64/3079	187/11509	0.0138862	CCDC69/KIF16B/EZR/KIF17/NUSAP1/CNN3/KIF1C/MTUS1/VAPA/KIF22/DNM1L/MAP4/MARK4/STIM1/DCTN1/GAS8/MAP1S/KIF2A/MAP4K4/TTBK2/PLK1/PRNP/KIF11/CLASP2/SPAG5/KIF2C/KIFC1/KIF5C/KIF3A/KIF15/JAKMIP2/MAP9/PRC1/KIF20A/KIF3C/PSRC1/BIRC5/RACGAP1/FCHO1/MAPRE3/SNCA/KIF4A/MAP1B/LZTS1/KIF18B/NEFM/TPPP/DNM1/FSD1/APC2/CLIP3/TIAM1/MAST1/DYNC1I1/CCDC181/REEP1/MAP1A/MAP2/KIF5A/MAPT/MTUS2/KIF1A/MTCL1/DCX	64
MF	GO:0004029	aldehyde dehydrogenase (NAD) activity	8/3079	14/11509	0.015697	ALDH1L1/ALDH3A2/ALDH3B1/ALDH2/ALDH1A1/ALDH7A1/ALDH1B1/ALDH9A1	8
MF	GO:0005161	platelet-derived growth factor receptor binding	8/3079	14/11509	0.015697	PDGFRA/PDGFC/IL1R1/ERN1/PDGFD/LYN/PTPRJ/ITGB3	8
MF	GO:0000149	SNARE binding	30/3079	79/11509	0.018863	ABCA1/SYT12/TNFAIP2/STX11/STXBP2/STX4/SNAP23/SYPL1/HECTD3/TXLNG/VAMP2/NSF/STXBP5L/SNCA/STXBP1/SNPH/DOC2B/TRIM9/SYT17/BAIAP3/SYP/SNAP25/STX1A/SYT11/UNC13A/SYT1/SNAP91/SYT5/CPLX2/SYT2	30
MF	GO:0071617	lysophospholipid acyltransferase activity	7/3079	12/11509	0.0207387	MBOAT7/AGPAT5/LPGAT1/AGPAT3/AGPAT4/LPCAT4/MBOAT2	7
MF	GO:0017124	SH3 domain binding	37/3079	103/11509	0.0251472	GJA1/SH3BP5/PLSCR4/HIP1R/CASP9/ENAH/QKI/GPX1/SH3GL1/EPS15/SIRPA/WASF2/ABI2/RUFY2/FUT8/EVL/SH3BP2/DNAJC6/PTTG1/SYNJ1/LYN/DOCK3/CNTNAP1/ELMO1/MICAL1/KHDRBS3/ELMO3/EFS/INPP5J/SH2D2A/ADAM12/DNM1/DPYSL3/AKAP5/PAK3/GRIK5/MAPT	37
MF	GO:0016408	C-acyltransferase activity	8/3079	15/11509	0.0258591	SPTSSA/HADHB/ACAT1/GCAT/ACAT2/ACAA1/SPTLC2/SCP2	8
MF	GO:0004143	diacylglycerol kinase activity	6/3079	10/11509	0.0274185	DGKA/DGKZ/DGKH/DGKI/DGKE/DGKB	6
MF	GO:0019905	syntaxin binding	21/3079	53/11509	0.0278981	ABCA1/STXBP2/SNAP23/SYPL1/HECTD3/TXLNG/VAMP2/NSF/STXBP5L/STXBP1/SNPH/DOC2B/SYT17/BAIAP3/SYP/SNAP25/UNC13A/SYT1/SYT5/CPLX2/SYT2	21
MF	GO:0030276	clathrin binding	18/3079	44/11509	0.0288296	DAB2/LDLR/SYT12/LDLRAP1/HIP1R/CLTCL1/DNM1L/AP2A2/DNAJC6/TRPC6/SYT17/NCALD/CALY/SYT11/SYT1/SNAP91/SYT5/SYT2	18
MF	GO:0005267	potassium channel activity	32/3079	88/11509	0.0298795	KCNQ1/KCNN2/KCNK3/KCNJ5/KCNMB4/KCNAB2/KCNC4/KCNAB1/KCNK15/KCNK7/KCNJ12/KCNMA1/KCNC3/KCND1/KCNMB2/KCNN3/KCNQ3/HCN4/GRIK3/SNAP25/GRIK2/KCNH2/KCNC1/KCNB1/GRIK5/KCNQ2/KCNH1/KCNA3/KCNH6/KCNB2/KCNK12/KCNJ6	32
MF	GO:0044325	ion channel binding	35/3079	98/11509	0.0314302	KCNQ1/FGF12/BAK1/GPD1L/ID2/TSPO/SRC/RIMS2/CIB1/ACTN4/SH3GL1/TRAPPC2/ACTN1/FHL1/SNTA1/PRNP/LYN/YWHAH/ANK2/KCNAB1/PKD1/FYN/FKBP1B/PDE4D/SLC8A1/PKP2/AKAP6/STAC/STX1A/SCN3B/KCNC1/RIMS3/KCNB1/RIMS1/RYR2	35
MF	GO:0005261	cation channel activity	76/3079	235/11509	0.0317534	KCNQ1/KCNN2/TMEM63A/KCNK3/CHRNB1/ITPR3/KCNJ5/KCNMB4/CACNA1H/GAS6/CACNB2/RASA3/KCNAB2/CACNA2D1/ORAI2/KCNC4/KCNAB1/FAM155B/TRPC1/PKD1/CACNB1/KCNK15/TRPC6/SCN8A/FKBP1B/ANO1/KCNK7/KCNJ12/KCNMA1/KCNC3/PIEZO2/KCND1/P2RX6/KCNMB2/CACNA1C/KCNN3/CACNB3/CACNA2D2/KCNQ3/SCN2B/HCN4/GRIK3/ASIC1/SNAP25/GRIK2/CACNA2D3/GRIN2A/KCNH2/SLC24A2/SCN3B/KCNC1/GRIA2/KCNB1/GRIA4/FAM155A/CHRNB4/SCN2A/SCN9A/CHRNA5/GRIK5/KCNQ2…	76
MF	GO:0003777	microtubule motor activity	22/3079	57/11509	0.033687	KIF16B/KIF17/KIF1C/KIF22/DYNC1H1/KIF2A/KLC1/KLC2/KIF11/KIF2C/KIFC1/KIF5C/KIF3A/KIF15/KIF20A/KIF3C/DNAH6/KIF4A/KIF18B/DYNC1I1/KIF5A/KIF1A	22
MF	GO:0009055	electron transfer activity	33/3079	92/11509	0.0337775	AOX1/FDX1/AKR1B1/STEAP4/POR/ALDH2/ASPH/NQO2/ETFDH/MAOB/TXNRD2/GLRX/ETFA/NQO1/AKR7A2/UQCRFS1/GLRX2/SDHA/TXNRD1/DLD/CYC1/ME1/SDHB/NDUFS2/NDUFS1/DEGS1/QDPR/LOXL2/SRD5A1/P4HA2/NOX4/IDO1/NDUFA4L2	33
MF	GO:0003756	protein disulfide isomerase activity	7/3079	13/11509	0.0347096	GLRX2/PDIA5/P4HB/PDIA6/ERO1A/ITGB3/PDIA2	7
MF	GO:0015299	solute:proton antiporter activity	7/3079	13/11509	0.0347096	SLC11A1/SLC9A8/SLC9A6/SLC9A7/CLCN5/CLCN4/SLC9A5	7
MF	GO:0016411	acylglycerol O-acyltransferase activity	7/3079	13/11509	0.0347096	DGAT1/MBOAT7/AGPAT5/LPGAT1/AGPAT3/AGPAT4/MBOAT2	7
MF	GO:0016722	oxidoreductase activity, oxidizing metal ions	7/3079	13/11509	0.0347096	STEAP4/CYBRD1/HEPH/ETFDH/MMACHC/STEAP3/CYB561	7
MF	GO:0016864	intramolecular oxidoreductase activity, transposing S-S bonds	7/3079	13/11509	0.0347096	GLRX2/PDIA5/P4HB/PDIA6/ERO1A/ITGB3/PDIA2	7
MF	GO:0022843	voltage-gated cation channel activity	36/3079	102/11509	0.0351069	KCNQ1/KCNK3/KCNJ5/CACNA1H/GAS6/CACNB2/KCNAB2/CACNA2D1/KCNC4/KCNAB1/CACNB1/KCNJ12/KCNMA1/KCNC3/KCND1/CACNA1C/CACNB3/CACNA2D2/KCNQ3/HCN4/SNAP25/CACNA2D3/GRIN2A/KCNH2/KCNC1/KCNB1/KCNQ2/CACNA1B/KCNH1/CACNG4/KCNA3/KCNH6/KCNB2/CACNG2/KCNJ6/OPRM1	36
MF	GO:0005244	voltage-gated ion channel activity	48/3079	142/11509	0.0370716	KCNQ1/KCNK3/KCNJ5/CLCN2/CACNA1H/GAS6/CACNB2/KCNAB2/CACNA2D1/CLCN5/KCNC4/CLCN4/KCNAB1/CACNB1/SCN8A/ANO1/KCNK7/KCNJ12/KCNMA1/KCNC3/KCND1/CACNA1C/CACNB3/CACNA2D2/KCNQ3/SCN2B/HCN4/SNAP25/CACNA2D3/GRIN2A/KCNH2/SCN3B/KCNC1/KCNB1/SCN2A/SCN9A/KCNQ2/CACNA1B/SCN3A/KCNH1/CACNG4/KCNA3/KCNH6/KCNB2/KCNK12/CACNG2/KCNJ6/OPRM1	48
MF	GO:0022832	voltage-gated channel activity	48/3079	142/11509	0.0370716	KCNQ1/KCNK3/KCNJ5/CLCN2/CACNA1H/GAS6/CACNB2/KCNAB2/CACNA2D1/CLCN5/KCNC4/CLCN4/KCNAB1/CACNB1/SCN8A/ANO1/KCNK7/KCNJ12/KCNMA1/KCNC3/KCND1/CACNA1C/CACNB3/CACNA2D2/KCNQ3/SCN2B/HCN4/SNAP25/CACNA2D3/GRIN2A/KCNH2/SCN3B/KCNC1/KCNB1/SCN2A/SCN9A/KCNQ2/CACNA1B/SCN3A/KCNH1/CACNG4/KCNA3/KCNH6/KCNB2/KCNK12/CACNG2/KCNJ6/OPRM1	48
MF	GO:0000062	fatty-acyl-CoA binding	8/3079	16/11509	0.0398221	SOAT1/ACADVL/ECI2/ALDH6A1/HMGCL/SCP2/ACOT11/ACOT7	8
MF	GO:0008574	ATP-dependent microtubule motor activity, plus-end-directed	10/3079	22/11509	0.0456095	KIF16B/KIF17/KIF1C/KIF11/KIF5C/KIF3A/KIF18B/DYNC1I1/KIF5A/KIF1A	10
MF	GO:0043548	phosphatidylinositol 3-kinase binding	10/3079	22/11509	0.0456095	IRS1/AXL/TYRO3/PIK3IP1/PIK3R1/ATP1A1/FBXL2/FYN/DAB1/INSRR	10
MF	GO:0003841	1-acylglycerol-3-phosphate O-acyltransferase activity	6/3079	11/11509	0.0468733	MBOAT7/AGPAT5/LPGAT1/AGPAT3/AGPAT4/MBOAT2	6
MF	GO:0031404	chloride ion binding	6/3079	11/11509	0.0468733	NQO2/CTSC/CLCN5/CLCN4/NLGN4X/ACE	6
MF	GO:0042171	lysophosphatidic acid acyltransferase activity	6/3079	11/11509	0.0468733	MBOAT7/AGPAT5/LPGAT1/AGPAT3/AGPAT4/MBOAT2	6
MF	GO:0099516	ion antiporter activity	16/3079	40/11509	0.0468881	SLC8B1/SLC26A1/SLC26A2/SLC11A1/SLC9A8/SLC3A2/SLC4A3/SLC9A6/SLC9A7/SLC4A5/SLC4A8/SLC9A5/SLC8A1/SLC24A2/SLC8A2/ATP1A3	16
MF	GO:0030507	spectrin binding	11/3079	25/11509	0.0470207	MYO7A/ADD3/SPTBN5/KIF3A/DMTN/ANK2/GNB3/SPTBN4/DYNC1I1/ADD2/PTPRN	11
MF	GO:0046873	metal ion transmembrane transporter activity	103/3079	333/11509	0.0475011	KCNQ1/SLC6A9/KCNN2/SLC8B1/SLC6A6/KCNK3/ATP1B3/ITPR3/SLC25A37/SLC12A2/KCNJ5/KCNMB4/SLC11A1/CACNA1H/SLC23A2/SLC1A3/SLC30A1/SLC6A8/SLC39A14/SLC12A4/SLC9A8/SLC3A2/GAS6/ATP1A1/ATP7A/SLC9A6/CACNB2/ATP2B1/SLC12A5/ZDHHC13/CNNM4/SLC9A7/RASA3/SLC31A1/KCNAB2/CACNA2D1/SLC39A6/ORAI2/SLC4A5/KCNC4/SLC4A8/KCNAB1/FAM155B/TRPC1/PKD1/CACNB1/SLC9A5/KCNK15/ATP1B1/TRPC6/SCN8A/FKBP1B/KCNK7/SLC1A1/KCNJ12/KCNMA1/SLC8A1/K…	103
MF	GO:0043014	alpha-tubulin binding	12/3079	28/11509	0.0477717	BEX4/EFHC1/ARL4C/RACGAP1/TRIM36/SNCA/FYN/CDK5R1/PACRG/NCALD/TTLL7/SLC6A2	12
MF	GO:0019894	kinesin binding	14/3079	34/11509	0.0479077	RAB29/TTBK2/KLC2/CLSTN1/SPTBN5/MAPK8IP3/KIFAP3/PRC1/LRP8/MAPK8IP2/SNCA/KIF18B/KCNC1/KIF5A	14
MF	GO:0015297	antiporter activity	22/3079	59/11509	0.0492848	SLC47A1/SLC8B1/SLC26A1/SLC26A2/SLC35D1/SLC11A1/SLC9A8/SLC3A2/SLC25A14/SLC4A3/SLC9A6/SLC35D2/SLC9A7/CLCN5/SLC4A5/CLCN4/SLC4A8/SLC9A5/SLC8A1/SLC24A2/SLC8A2/ATP1A3	22

## Sheet: Supplementary Table 2
Supplementary Table 2 KEGG signaling analysis of differentially expressed genes in PCPG comparing with normal adrenal gland tissue.
ID	Description	GeneRatio	BgRatio	pvalue	p.adjust	qvalue	geneID	Count
hsa00280	Valine, leucine and isoleucine degradation	29/1417	48/8048	3.75495e-11	1.20909e-08	8.57709e-09	316/224/26275/35/217/5096/5095/34/56922/3032/587/38/11112/1629/64087/39/3157/501/219/223/4329/30/593/3155/549/1738/84693/18/54511	29
hsa04360	Axon guidance	64/1417	181/8048	5.65456e-09	9.10385e-07	6.45811e-07	25791/7869/9353/10398/7852/2050/3983/64221/5336/57556/5163/6608/55740/5290/6714/5578/1969/6259/2770/10627/103910/56288/23380/7976/57522/5295/84552/5058/3984/50855/22885/818/9037/56920/6586/5881/55558/10505/7220/2534/57689/7225/10154/10500/658/2042/84628/80031/5362/1946/5364/2051/219699/2046/5063/137970/90249/56896/1949/6092/22854/655/816/3897	64
hsa04728	Dopaminergic synapse	47/1417	132/8048	4.78259e-07	4.14378e-05	2.93952e-05	406/3710/3762/55970/4129/4128/1312/5578/2770/5523/208/2788/10000/805/3800/818/5526/10681/5600/6300/5567/2778/54331/801/2784/9586/775/50632/5521/2786/2903/7054/5332/2775/6570/2891/2785/2893/3798/774/5522/816/1644/6571/1813/3763/94235	47
hsa04725	Cholinergic synapse	42/1417	113/8048	5.14755e-07	4.14378e-05	2.93952e-05	3784/3710/55970/5290/5578/23533/2770/208/2788/10000/5295/109/818/10681/5567/2534/54331/108/596/1131/3768/2784/107/9586/775/3786/43/2786/5332/1139/2775/2785/1143/814/3785/774/1136/816/1141/56479/3763/94235	42
hsa04713	Circadian entrainment	37/1417	97/8048	1.17151e-06	6.5005e-05	4.61134e-05	3710/5592/3762/55970/8912/5578/2770/2788/805/109/818/9252/8864/10681/5567/2778/8863/54331/108/801/9722/2784/107/775/2786/2903/117/5332/2775/2891/2785/2893/6262/816/3763/94235/116	37
hsa04911	Insulin secretion	34/1417	86/8048	1.21127e-06	6.5005e-05	4.61134e-05	3781/483/3710/27345/5578/9699/11069/6844/476/109/818/5864/5567/2778/3767/481/108/27445/1131/3778/107/9586/10242/775/3782/6616/6804/117/5332/6262/478/816/3630/116	34
hsa04925	Aldosterone synthesis and secretion	37/1417	98/8048	1.56788e-06	7.21225e-05	5.11624e-05	6770/1583/949/3949/185/3777/8536/483/3710/3762/23683/3991/8912/5587/221955/5578/466/476/805/490/109/57118/818/5567/2778/481/108/5581/801/107/9586/775/51305/5332/814/478/816	37
hsa00640	Propanoate metabolism	18/1417	34/8048	3.00728e-06	0.000121043	8.58658e-05	26275/35/5096/5095/38/84532/79611/1629/55902/8801/39/23417/4329/593/3945/1738/84693/18	18
hsa04261	Adrenergic signaling in cardiomyocytes	49/1417	149/8048	3.90822e-06	0.000139828	9.91912e-05	3784/185/483/1390/5578/23533/2770/5523/11069/208/7168/10000/476/805/783/490/109/818/781/5526/9252/5600/6300/5567/2778/782/481/108/596/801/70/6546/107/9586/4625/775/784/9254/5521/55799/5332/6543/6262/5522/478/816/27092/10369/6547	49
hsa05032	Morphine addiction	34/1417	91/8048	5.407e-06	0.000174105	0.000123507	3762/55970/5578/2770/5151/2788/2550/109/157/8622/5140/10681/5567/2778/10846/54331/108/5137/5144/2784/107/2562/2563/5139/2786/2566/2775/55879/2785/774/134/3763/4988/94235	34
hsa04724	Glutamatergic synapse	38/1417	114/8048	3.32231e-05	0.00097253	0.000689896	5337/3710/55970/6507/5578/9454/2770/2744/54407/2788/109/85358/157/1742/10681/5567/2778/7220/54331/108/6505/27165/2784/107/81539/775/2899/2898/2786/2903/5332/2775/2891/2785/2893/2901/2918/94235	38
hsa01212	Fatty acid metabolism	23/1417	57/8048	4.33695e-05	0.00116375	0.000825542	79966/9415/35/3992/34/37/3032/38/79071/60481/1376/39/6319/1374/30/3295/54995/27349/6342/9374/23305/6785/126129	23
hsa00561	Glycerolipid metabolism	24/1417	61/8048	4.85482e-05	0.0012025	0.000853033	231/224/26007/217/57678/8694/501/219/223/2710/1606/57104/55326/56894/84513/8525/23175/56895/160851/9162/8526/129642/1607/139189	24
hsa04727	GABAergic synapse	31/1417	89/8048	6.7818e-05	0.00155981	0.0011065	55970/6714/5578/2770/2744/54407/2788/4905/2550/109/57468/10681/5567/18/54331/108/27165/2784/107/81539/775/2562/2563/2786/2566/2775/55879/2785/774/3763/94235	31
hsa00380	Tryptophan metabolism	18/1417	42/8048	0.000115909	0.00248819	0.00176508	316/224/847/11185/217/38/4129/39/4128/501/219/223/1738/1743/56267/51166/3620/1644	18
hsa00071	Fatty acid degradation	18/1417	44/8048	0.000236515	0.004571	0.00324259	224/125/35/217/34/37/3032/38/1376/39/1374/501/219/10455/223/30/23305/126129	18
hsa04978	Mineral absorption	22/1417	59/8048	0.000249401	0.004571	0.00324259	7421/4502/4493/30061/483/4494/79901/9843/1181/4501/113235/7779/476/538/490/1317/481/261729/6546/6543/478/6547	22
hsa01040	Biosynthesis of unsaturated fatty acids	13/1417	27/8048	0.000255522	0.004571	0.00324259	79966/9415/3992/79071/60481/6319/10965/30/641371/3295/6342/11332/6785	13
hsa04923	Regulation of lipolysis in adipocytes	21/1417	56/8048	0.000313066	0.00530564	0.00376373	3667/4886/5592/3991/5290/2770/57104/208/10000/5295/109/5733/5140/5567/2778/108/107/5742/3630/134/4852	21
hsa00920	Sulfur metabolism	7/1417	10/8048	0.000377822	0.00608293	0.00431513	7263/9060/4357/6821/58472/8991/9061	7
hsa05412	Arrhythmogenic right ventricular cardiomyopathy	26/1417	77/8048	0.000447125	0.00685592	0.00486346	2697/3673/3680/51176/3908/1495/3672/1000/783/3696/781/782/3655/3690/6546/5318/775/784/9254/1496/55799/6543/6262/27092/10369/6547	26
hsa00564	Glycerophospholipid metabolism	31/1417	98/8048	0.000489403	0.00702022	0.00498002	5337/151056/57678/23171/56994/1119/1040/10390/79143/54675/1606/10434/55326/5130/9926/56894/84513/8525/23175/55224/23646/56895/8760/160851/9162/8526/254531/129642/43/1607/139189	31
hsa00620	Pyruvate metabolism	16/1417	39/8048	0.000501444	0.00702022	0.00498002	224/217/38/9380/84532/55902/39/5091/501/219/223/2271/3945/1738/4199/97	16
hsa04721	Synaptic vesicle cycle	26/1417	78/8048	0.000560359	0.00751815	0.00533324	6536/6507/8218/160/10312/6844/4905/161/535/526/5864/6812/155066/6505/534/1759/6616/6804/23025/6570/6857/22999/774/6571/6530/10814	26
hsa04015	Rap1 signaling pathway	56/1417	210/8048	0.00059654	0.00768344	0.00545049	5156/56034/5909/2254/2263/80310/22808/1956/23683/1435/5587/55740/5290/3684/6714/5578/1969/2770/11069/208/56288/9693/10000/5295/5217/51466/805/64411/5900/109/84552/9863/57568/50855/2247/9170/5600/5881/6300/2778/83660/2260/108/801/3690/107/1946/5228/7074/2903/5332/2775/285/2246/3630/1813	56
hsa00100	Steroid biosynthesis	10/1417	20/8048	0.000922899	0.0114297	0.00810806	1718/6646/7108/1717/10682/6307/1594/50814/2222/6713	10
hsa04071	Sphingolipid signaling pathway	35/1417	119/8048	0.000986106	0.0117602	0.00834249	5337/1903/4217/7132/5290/29956/5578/259230/2770/166929/5523/9517/208/4790/79603/91012/8560/10000/5295/5526/8879/5600/9846/5881/6300/2534/130367/596/5581/4985/10715/5521/5332/5522/134	35
hsa04961	Endocrine and other factor-regulated calcium reabsorption	19/1417	53/8048	0.00113235	0.0130221	0.00923763	7421/5745/483/8218/160/5578/161/476/490/5567/2778/481/6546/1759/5332/9365/6543/478/6547	19
hsa04024	cAMP signaling pathway	56/1417	216/8048	0.00123599	0.0137238	0.0097354	5337/10398/483/4886/3991/4792/5290/5465/2737/2770/22800/11069/208/4790/10000/5295/2550/476/805/64411/490/109/5058/818/5733/5140/5881/5567/2778/10846/481/108/801/5732/5144/107/9586/775/5021/5139/7074/268/10021/6751/2903/117/2891/2893/814/6262/478/816/134/1813/4852/116	56
hsa04072	Phospholipase D signaling pathway	41/1417	148/8048	0.00141197	0.0151039	0.0107144	552/5156/56034/185/5337/80310/22808/1956/5336/5290/5578/23533/22800/1606/55326/11069/208/56894/10000/5295/5900/109/8525/6464/25759/56895/9170/9846/2778/160851/2534/9162/8526/108/107/1759/1607/5332/3630/139189/2918	41
hsa01200	Carbon metabolism	34/1417	117/8048	0.0014541	0.0151039	0.0107144	9104/3417/26007/847/2203/9563/26275/35/5096/5095/48/38/84532/55902/5634/8801/39/5091/4329/6389/2271/6470/1738/2746/1743/4199/6390/84693/3418/3098/230/5214/2026/55753	34
hsa04010	MAPK signaling pathway	72/1417	294/8048	0.00150426	0.0151366	0.0107376	5778/5156/56034/3554/2254/6195/2263/80310/22808/1956/4217/80824/55970/2317/4609/8912/1435/6788/51701/3306/7132/355/929/5578/1969/4208/7048/22800/9261/208/4790/9693/10000/7046/9448/783/5058/1849/2247/9479/781/23162/9252/994/5600/23542/5881/6300/5567/27330/7786/2122/1850/782/2260/3925/1946/775/784/5228/9254/55799/5801/3481/285/2246/4137/774/27092/3630/4914/10369	72
hsa04520	Adherens junction	23/1417	71/8048	0.00176383	0.0172107	0.012209	1956/10810/51176/51701/1495/6714/81/7048/10163/56288/87/7046/5792/5797/117178/8936/5881/10458/5795/2534/5818/2260/1496	23
hsa04512	ECM-receptor interaction	27/1417	88/8048	0.00182916	0.0173232	0.0122888	7448/7148/3673/3914/6382/10319/3680/3908/6385/3913/3672/3696/7059/3910/1282/3909/2335/375790/960/3655/1277/3690/9900/7450/80144/7143/22987	27
hsa04070	Phosphatidylinositol signaling system	29/1417	97/8048	0.00196708	0.0180972	0.0128378	3710/113026/5336/3613/4534/5290/5578/1040/55300/1606/3628/79837/5295/3705/805/3631/8525/8867/8760/160851/9162/8526/9108/801/22876/84812/1607/5332/139189	29
hsa05231	Choline metabolism in cancer	29/1417	98/8048	0.00233439	0.0203392	0.0144282	80736/5156/56034/5337/80310/1956/10810/3091/5290/56994/1119/5578/1606/10434/5130/208/10163/10000/5295/5900/8525/126969/8936/5881/160851/9162/8526/1607/139189	29
hsa04926	Relaxin signaling pathway	36/1417	129/8048	0.00233711	0.0203392	0.0144282	59350/1956/55970/4792/5290/6714/5578/2770/7048/208/4790/2788/10000/5295/7046/109/6464/25759/1282/10681/5600/6300/5567/2778/54331/108/1277/2784/107/9586/2786/5332/2775/2785/4318/94235	36
hsa04514	Cell adhesion molecules	40/1417	148/8048	0.00263154	0.0222988	0.0158184	54413/7412/9672/6382/3680/50848/1462/6385/3108/3684/3109/58494/1000/4684/5792/3696/23114/5797/23705/29126/257194/8506/57689/6383/3655/5818/9379/214/57502/84628/22871/1272/9369/9080/9378/94030/57863/22854/3897/26047	40
hsa05031	Amphetamine addiction	22/1417	69/8048	0.00275304	0.0227302	0.0161244	4129/4128/23411/5578/805/818/5567/2778/801/9586/775/6804/2903/7054/23237/6570/2891/2893/814/816/1644/6571	22
hsa04810	Regulation of actin cytoskeleton	54/1417	214/8048	0.00284217	0.0228794	0.0162303	5962/5156/56034/10788/3673/2254/2263/7430/80310/22808/1956/10398/3680/7852/55970/221178/55740/5290/3684/6714/81/10627/7114/22800/3672/103910/10163/10152/87/28964/79837/5295/5217/340156/5058/3984/3696/2247/8936/9170/5881/10458/2335/3655/2260/3690/1131/50649/10297/7074/5063/2246/3645/3630	54
hsa00410	beta-Alanine metabolism	12/1417	30/8048	0.00321943	0.0242925	0.0172327	224/221/8639/26275/35/217/501/219/223/23417/4329/18	12
hsa00630	Glyoxylate and dicarboxylate metabolism	12/1417	30/8048	0.00321943	0.0242925	0.0172327	847/5096/5095/48/38/9380/84532/55902/39/6470/1738/84693	12
hsa00072	Synthesis and degradation of ketone bodies	6/1417	10/8048	0.00324403	0.0242925	0.0172327	56898/38/39/3157/3155/54511	6
hsa05414	Dilated cardiomyopathy	28/1417	96/8048	0.00346269	0.02501	0.0177416	3673/3680/3908/3672/7168/783/109/3696/781/5567/2778/782/3655/108/3690/70/6546/107/4625/775/784/9254/55799/6543/6262/27092/10369/6547	28
hsa04146	Peroxisome	25/1417	83/8048	0.00349518	0.02501	0.0177416	3417/847/92960/8504/1891/5264/215/2053/26063/10455/23417/30/8800/3295/5827/3155/5192/390916/6648/23600/6342/3418/23305/55711/54511	25
hsa00330	Arginine and proline metabolism	17/1417	50/8048	0.00385565	0.0269895	0.0191459	1160/224/217/112483/2628/4129/4128/6303/501/219/223/6611/2593/5831/8974/548596/1159	17
hsa00760	Nicotinate and nicotinamide metabolism	13/1417	35/8048	0.00470043	0.0322029	0.0228442	316/65220/93100/133686/23475/23411/10135/64802/4907/56953/84618/23057/554235	13
hsa00450	Selenocompound metabolism	8/1417	17/8048	0.00488736	0.0327861	0.0232578	9060/1491/11185/92935/10587/7296/56267/9061	8
hsa04921	Oxytocin signaling pathway	40/1417	154/8048	0.0055905	0.0367375	0.026061	8536/1956/10398/3710/3762/5997/6714/5578/23533/2770/4208/5564/340156/805/783/109/57118/140465/818/781/5567/2778/782/108/801/3768/107/775/784/5021/9254/55799/5332/2775/814/6262/816/27092/10369/3763	40
hsa04210	Apoptosis	36/1417	136/8048	0.00602191	0.0387811	0.0275106	2081/3710/578/4217/842/9131/8797/841/1512/4792/8795/8743/7132/5290/355/10039/824/2021/143/1075/8837/8772/1965/208/4790/10000/5295/3563/27113/7846/56616/332/1521/596/8739/4914	36
hsa04750	Inflammatory mediator regulation of TRP channels	28/1417	100/8048	0.00645153	0.0406432	0.0288316	5580/3554/3710/5336/5290/6714/5578/5295/805/109/818/5734/5600/6300/5567/2778/108/5581/9311/801/5732/3269/107/41/5332/816/55515/4914	28
hsa04927	Cortisol synthesis and secretion	20/1417	65/8048	0.0065635	0.0406432	0.0288316	6770/1583/949/3949/185/3777/3710/57552/8912/5087/5151/109/8622/5567/2778/108/107/9586/775/5332	20
hsa04371	Apelin signaling pathway	36/1417	137/8048	0.00682136	0.0407801	0.0289286	185/22808/3710/3991/55970/23533/2770/4208/22800/5564/208/2788/10000/7046/340156/805/109/5140/10681/5567/4854/54331/108/5581/801/6546/2784/107/2786/5332/2785/814/6543/6262/6547/94235	36
hsa04260	Cardiac muscle contraction	25/1417	87/8048	0.00683889	0.0407801	0.0289286	483/444/7386/1537/7168/476/10479/783/84679/781/782/481/70/6546/4625/775/784/9254/55799/6543/6262/478/27092/10369/6547	25
hsa05230	Central carbon metabolism in cancer	21/1417	70/8048	0.00746128	0.0436824	0.0309875	3417/5156/2263/1956/3091/4609/5163/5290/3945/2744/208/10000/5295/3418/3098/5214/2260/27165/8140/5979/4914	21
hsa05030	Cocaine addiction	16/1417	49/8048	0.00773294	0.0444644	0.0315423	4129/4128/2770/4790/1742/5567/2778/8851/9586/2903/7054/6570/2891/1644/6571/1813	16
hsa04152	AMPK signaling pathway	32/1417	120/8048	0.00826031	0.0466635	0.0331022	3667/79966/2203/6720/3991/6517/2308/79602/6319/3156/55437/1374/23411/5290/23417/5523/5564/208/10000/2309/5295/23216/890/5526/5210/5214/9586/8900/5521/126129/5522/3630	32
hsa00340	Histidine metabolism	9/1417	22/8048	0.00876694	0.0486716	0.0345268	224/144193/221/217/4129/4128/501/219/223	9
hsa00230	Purine metabolism	34/1417	130/8048	0.00905338	0.04941	0.0350505	9060/2766/5236/55276/5634/2272/957/5151/102157402/353/203/9061/221264/109/29922/22875/4907/9583/8622/5140/271/10846/5158/56953/108/5137/5144/107/84618/205/26289/5139/956/9615	34
